# Supplementary material
Source: publisher figshare collection journal article supplement (https://acs.figshare.com/ndownloader/files/22202931)
Supplement: Supplementary file 1 [file 22202931]

## Sheet: File 2
Log2 LFQ intensities of proteins with significantly altered abundance. Razor and unique peptides were used for quantification. One factorial ANOVA, Significance of microarrays method (Proteome 120 h) and two-factorial ANOVA (Temporal proteomic profile) were calculated followed by a correction for multiple testing by the method of Benjamini-Hochberg. Additionally, Tukey's post-hoc test were calcul…

## Sheet: Proteome (120h)
Protein identification data										One way ANOVA	p-value, Tukey's post-hoc test			Ratio (based on LFQ intensities)			log2 LFQ intensity																		LFQ intensity
UniProt Accession	Protein names	Gene names	Peptides	Razor + unique peptides	Unique peptides	Sequence coverage [%]	Q-value	Score	MS/MS Count	adjusted p-value (Benjamini-Hochberg)	120hEtOH-0h	120h RA-0h	120h RA - 120h EtOH	120h EtOH/0h	120h RA/0h	120h RA/120h EtOH	0h_1	0h_2	0h_3	0h_4	0h_5	0h_6	120h EtOH_1	120h EtOH_2	120h EtOH_3	120h EtOH_4	120h EtOH_5	120h EtOH_6	120h RA_1	120h RA_2	120h RA_3	120h RA_4	120h RA_5	120h RA_6	0h_1	0h_2	0h_3	0h_4	0h_5	0h_6	120h EtOH_1	120h EtOH_2	120h EtOH_3	120h EtOH_4	120h EtOH_5	120h EtOH_6	120h RA_1	120h RA_2	120h RA_3
Q2M2I8;Q9NSY1	Multidrug resistance protein 1	ABCB1	25	25	25	24.7	0	78.777	224	1.00779e-06	0.00208693	9.61612e-09	2.35115e-06	1.29561	2.13349	1.6467	24.5755	24.569	24.7573	24.8083	24.9234	24.7466	24.9272	25.147	25.177	24.9499	25.2443	25.1793	26.0389	25.8661	25.8052	25.9949	25.6005	25.6063	2.50013e+07	2.48889e+07	2.83589e+07	2.93794e+07	3.18193e+07	2.81494e+07	3.19032e+07	3.71536e+07	3.79343e+07	3.24092e+07	3.97458e+07	3.79948e+07	6.8943e+07	6.11606e+07	5.86326e+07
P49588	Very long-chain specific acyl-CoA dehydrogenase, mitochondrial	ACADVL	29	29	29	53.9	0	163.51	381	2.354e-07	8.23164e-06	8.6142e-10	7.35515e-06	1.41263	2.01318	1.42513	25.4099	25.255	25.4107	25.5247	25.6163	25.3143	25.9796	25.8983	25.7921	25.9343	25.9999	25.9384	26.3919	26.6534	26.4085	26.2266	26.3912	26.5115	4.45802e+07	4.00417e+07	4.46049e+07	4.82726e+07	5.14369e+07	4.17219e+07	6.61666e+07	6.2541e+07	5.81026e+07	6.41213e+07	6.71042e+07	6.43038e+07	8.80549e+07	1.05554e+08	8.90739e+07
Q5JTZ9	Apoptotic chromatin condensation inducer in the nucleus	ACIN1	23	23	23	21.6	0	56.453	237	0.0241495	0.0187407	0.999997	0.0186546	1.16432	0.998206	0.857333	24.8957	25.2159	25.0037	25.156	25.0457	24.8421	25.3278	25.1588	25.1222	25.197	25.2722	25.4131	25.078	25.0673	25.0829	25.1131	25.0135	24.8033	3.12142e+07	3.89711e+07	3.36406e+07	3.73861e+07	3.46343e+07	3.00758e+07	4.21141e+07	3.74588e+07	3.65204e+07	3.84639e+07	4.05219e+07	4.46792e+07	3.54185e+07	3.51568e+07	3.5539e+07
Q9BTE6	Lysosomal acid phosphatase	ACP2	3	3	3	7.6	0	6.9708	22	0.000571622	0.178616	6.6315e-05	0.0023829	1.38597	2.84861	2.05532	NaN	NaN	20.0007	NaN	NaN	NaN	20.7291	NaN	20.3342	20.5533	NaN	NaN	21.338	21.2205	21.232	21.045	21.1663	21.2795	NaN	NaN	1.04908e+06	NaN	NaN	NaN	1.73812e+06	NaN	1.32192e+06	1.53872e+06	NaN	NaN	2.65081e+06	2.44347e+06	2.46303e+06
Q9NRN7	Long-chain-fatty-acid--CoA ligase 1	ACSL1	11	11	11	24.6	0	18.209	55	0.0352983	0.0230249	0.974361	0.0351487	1.34319	1.0263	0.764075	22.1385	22.4394	22.1044	22.4614	22.5029	22.3135	22.5093	22.766	22.7692	22.7828	22.3705	23.2169	22.3177	22.4444	22.0762	22.278	22.2575	22.7641	4.61692e+06	5.68765e+06	4.50907e+06	5.77504e+06	5.94358e+06	5.21234e+06	5.97e+06	7.13262e+06	7.14845e+06	7.21616e+06	5.4224e+06	9.74952e+06	5.22754e+06	5.70739e+06	4.42179e+06
Q9NY61	Alpha-actinin-4	ACTN4	51	35	34	64.7	0	170.44	496	0.00418163	0.242942	0.000818335	0.0233472	1.12148	1.35236	1.20587	25.8389	25.8479	25.8544	25.804	26.0461	25.8314	26.3922	25.8653	25.8162	25.9757	26.0899	26.0137	26.3098	26.242	26.0197	26.3397	26.3969	26.4967	6.00183e+07	6.03939e+07	6.06666e+07	5.85839e+07	6.92879e+07	5.97071e+07	8.80732e+07	6.11267e+07	5.90814e+07	6.5988e+07	7.14237e+07	6.77492e+07	8.31838e+07	7.9365e+07	6.80315e+07
P80404	Double-stranded RNA-specific adenosine deaminase	ADAR	30	30	30	36	0	183.15	255	0.0152196	0.0550402	0.430797	0.00448192	1.14313	0.935605	0.81846	25.1756	25.0486	25.2427	25.2653	25.3844	25.1193	25.3874	25.1363	25.4923	25.3174	25.6123	25.4277	25.0529	25.0699	24.9871	25.2706	25.1631	25.1234	3.78975e+07	3.4704e+07	3.97018e+07	4.03286e+07	4.37992e+07	3.64471e+07	4.38903e+07	3.68791e+07	4.72005e+07	4.18116e+07	5.12945e+07	4.51336e+07	3.48076e+07	3.52202e+07	3.32557e+07
P08183;P21439	Alpha-adducin	ADD1	18	18	17	31.8	0	51.673	167	7.67162e-08	3.43793e-06	2.07195e-10	1.64838e-06	1.42409	2.0775	1.45882	24.0705	24.212	24.3174	24.122	24.3664	24.2025	24.6376	24.631	24.888	24.6971	24.7353	24.7679	25.3065	25.298	25.1916	25.4804	25.2445	25.091	1.76174e+07	1.94329e+07	2.09058e+07	1.82577e+07	2.1628e+07	1.93054e+07	2.6101e+07	2.59818e+07	3.10481e+07	2.71999e+07	2.79298e+07	2.85681e+07	4.14969e+07	4.12531e+07	3.83202e+07
Q9NP58	Gamma-adducin	ADD3	19	19	19	33.1	0	63.914	119	5.19258e-06	0.000170047	8.58924e-08	0.000537643	2.36664	5.182	2.1896	21.8017	21.1752	22.2927	22.2121	22.6823	22.2578	23.0543	23.2684	23.131	23.7222	23.8386	23.0806	24.5782	24.1676	24.2842	24.2027	24.8493	24.8396	3.65566e+06	2.36794e+06	5.13773e+06	4.85857e+06	6.73058e+06	5.01494e+06	8.71035e+06	1.01038e+07	9.18597e+06	1.38387e+07	1.50015e+07	8.8706e+06	2.50481e+07	1.8844e+07	2.04302e+07
P33527	Neuroblast differentiation-associated protein AHNAK	AHNAK	40	40	40	20.8	0	62.925	129	4.75273e-05	0.000805286	1.7425e-06	0.00787949	4.11704	12.4525	3.02462	21.2821	21.3086	22.6088	20.9086	NaN	19.7214	23.5259	23.7786	22.9086	23.6003	23.7297	21.6909	25.157	24.1632	25.3303	24.2333	25.5246	24.753	2.55006e+06	2.59733e+06	6.39627e+06	1.96841e+06	NaN	864436	1.20782e+07	1.43904e+07	7.87364e+06	1.27174e+07	1.39108e+07	3.38541e+06	3.74121e+07	1.87866e+07	4.21871e+07
P28288	Delta-1-pyrroline-5-carboxylate synthase;Glutamate 5-kinase;Gamma-glutamyl phosphate reductase	ALDH18A1	25	25	25	36.5	0	79.195	212	6.6134e-05	2.81807e-06	0.00120371	0.00981697	1.57341	1.29451	0.82274	24.7061	24.4131	24.3664	24.8054	24.3582	24.4031	25.1508	25.2083	25.1618	25.2062	25.1582	25.157	25.0623	24.8314	24.6072	24.9032	24.915	24.9935	2.73701e+07	2.23396e+07	2.1628e+07	2.93204e+07	2.15055e+07	2.21853e+07	3.72516e+07	3.87663e+07	3.75367e+07	3.87099e+07	3.74432e+07	3.74121e+07	3.50352e+07	2.98536e+07	2.55567e+07
P61221	4-trimethylaminobutyraldehyde dehydrogenase	ALDH9A1	17	17	17	46.2	0	80.943	190	0.0118317	0.00322558	0.406431	0.0440091	0.802472	0.926733	1.15485	24.334	24.4336	24.2863	24.2569	24.512	24.3419	23.9298	23.8999	23.7317	24.1335	24.186	24.3149	24.3025	24.335	24.2145	24.1248	24.2664	24.2694	2.11477e+07	2.26593e+07	2.046e+07	2.00472e+07	2.39247e+07	2.12639e+07	1.59804e+07	1.56526e+07	1.39301e+07	1.84038e+07	1.90858e+07	2.08696e+07	2.0691e+07	2.11624e+07	1.94666e+07
Q8NE71	Rabankyrin-5	ANKFY1	9	9	9	12.2	0	16.776	49	0.00110007	0.00013085	0.0666188	0.0155412	0.708946	0.861511	1.2152	22.1962	22.6674	22.4058	22.6254	22.622	22.4546	22.0354	21.8891	21.8512	22.0178	22.0905	22.1423	22.1084	22.322	22.4879	22.2088	22.152	22.4166	4.80532e+06	6.66143e+06	5.55671e+06	6.47029e+06	6.45506e+06	5.74789e+06	4.29849e+06	3.88397e+06	3.78326e+06	4.24637e+06	4.46584e+06	4.6291e+06	4.52159e+06	5.24314e+06	5.8821e+06
Q9NUJ1	Annexin A2;Putative annexin A2-like protein	ANXA2;ANXA2P2	33	33	33	76.4	0	323.31	528	0.000254812	0.750323	0.000179469	4.7712e-05	1.07646	0.644143	0.598392	27.6764	27.6333	27.6212	27.9106	27.5777	27.7286	27.4781	27.5214	27.9925	27.5409	27.9512	28.1721	26.9298	27.0279	26.9018	27.276	27.1192	27.0783	2.145e+08	2.08186e+08	2.06448e+08	2.52306e+08	2.00316e+08	2.22403e+08	1.86953e+08	1.92649e+08	2.67044e+08	1.95271e+08	2.59507e+08	3.02446e+08	1.27843e+08	1.36839e+08	1.25386e+08
Q8NFV4	AP-2 complex subunit beta	AP2B1	36	36	22	44.3	0	144.19	279	2.82806e-05	0.00727232	8.98413e-07	0.000366885	1.15933	1.4344	1.23727	25.3059	25.1112	25.2948	25.2546	25.2712	25.275	25.4692	25.606	25.4678	25.4579	25.4099	25.3796	25.5376	25.6759	25.778	25.7962	25.8944	25.9266	4.14796e+07	3.6243e+07	4.11617e+07	4.00306e+07	4.04939e+07	4.06007e+07	4.64508e+07	5.1071e+07	4.64057e+07	4.60884e+07	4.45802e+07	4.36537e+07	4.87061e+07	5.36063e+07	5.75375e+07
Q8N2K0	Arfaptin-1	ARFIP1	3	3	3	13.1	0	6.2778	16	9.91315e-05	0.00197319	5.13331e-06	0.0127822	0.463083	0.252327	0.544884	21.5899	21.8271	21.2166	22.2339	21.5381	21.3738	NaN	NaN	20.6579	20.5963	20.3459	21.2926	NaN	20.3797	NaN	NaN	NaN	NaN	3.15651e+06	3.72059e+06	2.43687e+06	4.93254e+06	3.04519e+06	2.71741e+06	NaN	NaN	1.65443e+06	1.58527e+06	1.33268e+06	2.56869e+06	NaN	1.36427e+06	NaN
Q8IZP0	Rho GTPase-activating protein 36	ARHGAP36	12	12	12	36.9	0	54.206	81	0.0230602	0.788867	0.0375414	0.0102085	0.878286	1.7009	1.93662	22.5269	22.6738	21.9861	22.4314	22.0164	21.6516	22.0786	21.7602	22.0154	22.1453	21.7747	22.51	22.7489	22.9053	24.0341	22.3579	22.5581	22.8446	6.04328e+06	6.69104e+06	4.15409e+06	5.65619e+06	4.24226e+06	3.29444e+06	4.42915e+06	3.552e+06	4.23932e+06	4.63873e+06	3.58788e+06	5.9729e+06	7.04857e+06	7.85565e+06	1.71785e+07
Q9NYB9	Actin-related protein 2/3 complex subunit 2	ARPC2	15	15	15	65.7	0	143.8	148	0.0202417	0.997925	0.0144481	0.0163207	1.00414	1.27424	1.26898	24.4987	24.8226	25.0338	24.5772	24.7537	24.6407	24.733	25.0038	24.6534	24.7897	24.7628	24.424	24.753	25.2075	25.2025	25.0022	25.0453	25.2242	2.37052e+07	2.9672e+07	3.43498e+07	2.50308e+07	2.82883e+07	2.61571e+07	2.78853e+07	3.36429e+07	2.63884e+07	2.9003e+07	2.84673e+07	2.2509e+07	2.82745e+07	3.87448e+07	3.86108e+07
P09110	Argininosuccinate lyase	ASL	5	5	5	12.5	0	4.6971	15	0.0196642	0.923808	0.0223423	0.0105074	0.942837	2.2093	2.34324	NaN	NaN	NaN	NaN	NaN	NaN	NaN	NaN	NaN	NaN	19.984	NaN	NaN	21.2794	20.8368	20.5132	21.3082	20.4015	NaN	NaN	NaN	NaN	NaN	NaN	NaN	NaN	NaN	NaN	1.03701e+06	NaN	NaN	2.54529e+06	1.87284e+06
P42765	ATPase ASNA1	ASNA1	11	11	11	46	0	31.669	85	0.00688488	0.241167	0.00144707	0.0413606	0.915985	0.800635	0.87407	23.9888	23.985	24.1489	24.2181	24.1902	24.2973	23.9029	23.948	23.9561	24.0741	24.0552	24.1452	23.6768	23.8243	23.5949	23.9377	24.0086	23.8473	1.66475e+07	1.66037e+07	1.86013e+07	1.95153e+07	1.91415e+07	2.06166e+07	1.56852e+07	1.61833e+07	1.62744e+07	1.76614e+07	1.74316e+07	1.85537e+07	1.34099e+07	1.48535e+07	1.26699e+07
Q13085;O00763	Asparagine synthetase [glutamine-hydrolyzing]	ASNS	14	14	14	35.5	0	49.034	123	6.21332e-08	6.13328e-09	2.07362e-10	0.0103167	0.431747	0.345836	0.801015	24.6194	24.7038	24.9763	24.8958	24.8664	25.0882	23.4832	23.7109	23.6847	23.8497	23.5419	23.6309	23.1314	23.3156	23.0929	23.5747	23.3597	23.4746	2.57738e+07	2.73266e+07	3.30077e+07	3.12164e+07	3.05867e+07	3.56698e+07	1.17259e+07	1.37307e+07	1.34836e+07	1.51173e+07	1.22129e+07	1.299e+07	9.18851e+06	1.04399e+07	8.94655e+06
Q9H845	Manganese-transporting ATPase 13A1	ATP13A1	15	15	15	16.3	0	36.446	124	0.00183226	0.0255645	0.0796651	0.000251214	1.19251	0.868949	0.728674	23.202	23.534	23.29	23.583	23.2982	23.4556	23.4732	23.7948	23.4986	23.7575	23.6813	23.691	23.1092	23.1927	23.1942	23.4161	22.9351	23.2939	9.64935e+06	1.21462e+07	1.02563e+07	1.25658e+07	1.03147e+07	1.15037e+07	1.16449e+07	1.45529e+07	1.18518e+07	1.41814e+07	1.34518e+07	1.35426e+07	9.0482e+06	9.58735e+06	9.59732e+06
P11310	ATP synthase subunit g, mitochondrial	ATP5L	6	6	6	53.4	0	13.911	51	0.00024027	2.04302e-05	0.108031	0.00112909	1.64308	1.1815	0.719079	24.1593	23.7618	24.0694	23.8151	23.9205	23.7945	24.6634	24.6785	24.8954	24.582	24.6027	24.3977	24.5515	24.1651	24.1873	24.1147	24.0229	23.8778	1.87359e+07	1.42238e+07	1.7604e+07	1.47591e+07	1.58777e+07	1.45498e+07	2.65719e+07	2.68515e+07	3.12077e+07	2.51142e+07	2.54771e+07	2.21024e+07	2.45888e+07	1.88113e+07	1.91031e+07
P45954	V-type proton ATPase subunit B, brain isoform	ATP6V1B2	22	22	22	57.1	0	120.06	296	0.0010946	0.564433	0.000228922	0.00171225	0.961177	0.817666	0.850693	25.4022	25.4293	25.2025	25.5576	25.3776	25.4904	25.3234	25.2063	25.3347	25.329	25.4615	25.4699	25.109	25.1388	25.0527	25.1722	25.1413	25.1251	4.43429e+07	4.51837e+07	3.86108e+07	4.9386e+07	4.35932e+07	4.71384e+07	4.19859e+07	3.87126e+07	4.2316e+07	4.21491e+07	4.62035e+07	4.64733e+07	3.61878e+07	3.69431e+07	3.48028e+07
P49748	Copper-transporting ATPase 1	ATP7A	12	12	12	9.9	0	20.549	49	6.21332e-08	0.0508644	3.77852e-10	5.12104e-09	1.41382	9.42133	6.66374	20.4082	20.7017	21.2412	20.4165	20.0983	20.4661	21.2051	21.1903	21.0433	21.2361	20.9877	20.914	24.0189	23.6708	24.5179	23.1065	23.7767	23.5356	1.39149e+06	1.70543e+06	2.47878e+06	1.39952e+06	1.12251e+06	1.44847e+06	2.41753e+06	2.39285e+06	2.16105e+06	2.47003e+06	2.07935e+06	1.97579e+06	1.69985e+07	1.33543e+07	2.40228e+07
P24752	Ribosome biogenesis protein BOP1	BOP1	9	9	9	23.5	0	32.894	74	0.00580819	0.00175336	0.657559	0.0102906	1.52166	1.09096	0.716952	22.7492	22.661	23.1548	22.6271	22.6467	22.8587	23.4974	23.4428	23.6531	23.4033	23.4472	22.8358	22.9915	23.0584	23.0387	23.0294	22.4473	22.8712	7.05004e+06	6.63194e+06	9.33876e+06	6.47792e+06	6.56653e+06	7.60597e+06	1.18419e+07	1.14021e+07	1.31915e+07	1.10942e+07	1.1437e+07	7.48619e+06	8.33933e+06	8.73514e+06	8.61668e+06
Q9BWD1	Bystin	BYSL	7	7	7	18.8	0	12.483	32	0.00238681	0.320202	0.000457992	0.00885945	0.848981	0.577186	0.679857	22.2323	22.2609	22.2706	22.4987	22.6878	22.3302	21.725	22.0837	22.0496	22.1774	22.5565	22.2022	21.1755	21.4803	21.074	21.9728	21.9094	21.7274	4.92707e+06	5.02572e+06	5.05963e+06	5.9263e+06	6.75629e+06	5.27303e+06	3.46638e+06	4.44484e+06	4.34101e+06	4.7431e+06	6.16855e+06	4.82534e+06	2.36843e+06	2.9256e+06	2.20753e+06
Q9H3P7	CAD protein;Glutamine-dependent carbamoyl-phosphate synthase;Aspartate carbamoyltransferase;Dihydroorotase	CAD	40	40	39	29.5	0	135.28	345	0.000550848	0.0112172	4.95119e-05	0.0327826	0.818019	0.693177	0.847385	25.1375	24.9985	25.2539	25.3336	25.2152	25.1165	24.6895	24.796	24.9102	24.8432	25.0268	25.0423	24.5877	24.4937	24.4859	24.9785	24.5694	24.7283	3.69098e+07	3.35196e+07	4.00112e+07	4.22838e+07	3.89522e+07	3.63764e+07	2.7057e+07	2.913e+07	3.15295e+07	3.00987e+07	3.41836e+07	3.45528e+07	2.52136e+07	2.36232e+07	2.34958e+07
Q9UKV3	Calmodulin	CALM1	6	6	6	54.4	0	130.13	101	6.75652e-05	0.00167548	2.84426e-06	0.00710639	2.10368	3.72135	1.76898	23.9304	23.1478	23.9574	23.7853	23.7329	24.0663	25.4184	24.692	24.5751	25.0767	25.095	23.9296	25.3926	25.6059	26.3192	25.4179	25.7862	25.3979	1.5987e+07	9.29356e+06	1.62891e+07	1.44574e+07	1.39417e+07	1.75662e+07	4.48436e+07	2.7104e+07	2.49944e+07	3.53866e+07	3.58383e+07	1.59782e+07	4.40488e+07	5.10674e+07	8.37276e+07
P53396	F-actin-capping protein subunit alpha-1	CAPZA1	14	14	12	68.9	0	167.83	210	0.0117275	0.0129343	0.906882	0.00555335	0.810431	1.02168	1.26067	25.5895	25.2323	25.2541	25.5766	25.7305	25.5047	25.1489	25.1287	25.0644	25.0596	25.2545	25.4419	25.3633	25.5991	25.4282	25.5163	25.5236	25.687	5.04902e+07	3.94166e+07	4.00167e+07	5.00407e+07	5.5674e+07	4.7608e+07	3.72026e+07	3.66853e+07	3.50862e+07	3.49696e+07	4.00278e+07	4.55801e+07	4.31632e+07	5.08273e+07	4.51493e+07
P21399	F-actin-capping protein subunit alpha-2	CAPZA2	13	11	11	63.3	0	82.769	139	0.0106791	0.0241617	0.589884	0.00330833	0.817351	1.06523	1.30327	24.2413	24.2321	23.9674	24.0109	24.4266	23.9809	24.0855	23.6291	23.7258	23.8832	24.1013	23.674	24.1239	24.1859	24.2381	24.4141	24.2018	24.2854	1.98316e+07	1.97056e+07	1.64024e+07	1.69045e+07	2.25496e+07	1.65566e+07	1.78016e+07	1.29738e+07	1.38732e+07	1.54725e+07	1.79976e+07	1.33839e+07	1.82817e+07	1.90845e+07	1.97877e+07
Q99798	F-actin-capping protein subunit beta	CAPZB	15	15	15	52	0	41.466	169	0.00709592	0.0391777	0.261454	0.00152087	0.789836	1.1654	1.47549	24.8864	24.8389	25.0113	24.6722	24.7098	25.0946	24.336	24.5451	24.4007	24.5489	24.49	24.8425	25.4049	25.0884	24.8296	24.6587	25.3435	25.119	3.10137e+07	3.00092e+07	3.38183e+07	2.67345e+07	2.74404e+07	3.58284e+07	2.11771e+07	2.448e+07	2.21484e+07	2.45446e+07	2.35627e+07	3.00841e+07	4.4426e+07	3.56748e+07	2.98163e+07
Q86TX2;P49753	CCAAT/enhancer-binding protein zeta	CEBPZ	10	10	10	14.2	0	26.95	50	1.56081e-05	4.02824e-07	0.00212129	0.000405513	3.31485	1.70237	0.513559	21.417	20.9373	21.5725	20.6809	21.5974	20.8535	22.7463	23.2467	23.2517	23.0794	22.539	22.6784	22.2848	21.7637	22.092	22.2207	21.7484	21.7103	2.80001e+06	2.00796e+06	3.11867e+06	1.68101e+06	3.17296e+06	1.89465e+06	7.03588e+06	9.953e+06	9.98755e+06	8.86322e+06	6.09418e+06	6.71241e+06	5.10967e+06	3.56063e+06	4.47049e+06
O00154	Chromogranin-A;Vasostatin-1;Vasostatin-2;EA-92;ES-43;Pancreastatin;SS-18;WA-8;WE-14;LF-19;Catestatin;AL-11;GV-19;GR-44;ER-37;GE-25;Serpinin-RRG;Serpinin;p-Glu serpinin precursor	CHGA	13	13	13	43.3	0	78.226	128	9.98253e-06	7.70092e-06	0.160352	4.10535e-07	2.58848	0.802655	0.310088	23.8883	24.3346	24.0313	24.2765	23.8205	24.0918	25.4415	25.7161	25.3222	25.7379	25.3544	25.0636	24.3169	23.3381	23.1079	24.0989	23.8103	23.5799	1.55273e+07	2.11565e+07	1.71452e+07	2.03214e+07	1.48144e+07	1.78795e+07	4.55674e+07	5.5121e+07	4.19509e+07	5.59603e+07	4.28978e+07	3.50667e+07	2.08986e+07	1.0604e+07	9.04005e+06
O14734	Cirhin	CIRH1A	10	10	10	23.6	0	24.661	52	0.00221586	0.897235	0.000819702	0.00197134	0.950526	0.61885	0.65106	21.9554	22.0849	21.9531	22.495	22.3265	21.7476	22.2583	22.2047	21.8478	22.1515	22.0355	21.6696	21.511	21.3026	21.3689	21.8759	21.1518	21.2021	4.06662e+06	4.44854e+06	4.06015e+06	5.91112e+06	5.25952e+06	3.52111e+06	5.01667e+06	4.83371e+06	3.77436e+06	4.65871e+06	4.29879e+06	3.3358e+06	2.98852e+06	2.58655e+06	2.70819e+06
Q9Y305	Chloride intracellular channel protein 4	CLIC4	11	11	11	66.8	0	35.992	92	0.000401596	0.0128674	3.16388e-05	0.0173724	1.39445	1.85806	1.33247	24.3218	23.8733	24.2377	23.9266	24.1828	24.4478	24.8287	24.829	24.7278	24.5985	24.8363	23.9503	24.9559	25.1155	25.1414	25.08	24.9546	25.1762	2.09697e+07	1.53667e+07	1.97822e+07	1.5945e+07	1.90436e+07	2.28834e+07	2.97977e+07	2.98039e+07	2.77849e+07	2.54031e+07	2.99551e+07	1.62091e+07	3.25443e+07	3.63512e+07	3.70097e+07
Q15067	Clustered mitochondria protein homolog	CLUH	7	7	7	7.2	0	9.1714	23	0.000514356	0.166435	5.64645e-05	0.00217045	0.642804	0.274603	0.427195	21.9764	22.0519	21.9013	21.9749	21.4251	21.7229	21.2019	20.9206	21.4821	21.0331	20.712	21.7223	NaN	NaN	NaN	21.0827	20.4067	NaN	4.12625e+06	4.34794e+06	3.91695e+06	4.12196e+06	2.81577e+06	3.46134e+06	2.41217e+06	1.98485e+06	2.92925e+06	2.14582e+06	1.71764e+06	3.4599e+06	NaN	NaN	NaN
P24666	Cellular nucleic acid-binding protein	CNBP	5	5	5	35	0	84.172	65	4.04957e-06	1.79289e-05	7.04839e-08	0.00481764	0.586791	0.435632	0.742397	24.5443	24.8551	24.7271	24.7495	24.9171	25.1665	23.8928	23.7665	24.1969	24.1173	24.2847	24.1005	23.8434	23.6902	23.3899	23.8143	23.4676	23.5803	2.44664e+07	3.0348e+07	2.77715e+07	2.8206e+07	3.16807e+07	3.76592e+07	1.55758e+07	1.42702e+07	1.92306e+07	1.81983e+07	2.04373e+07	1.79876e+07	1.50515e+07	1.35351e+07	1.09916e+07
P11117	Calponin-2	CNN2	6	5	5	23	0	13.71	36	6.75652e-05	0.00500493	0.00234829	2.82234e-06	0.559698	2.04292	3.65003	20.8971	20.9608	21.2437	21.1838	20.9282	20.4971	NaN	19.9678	20.0961	21.0175	NaN	NaN	22.4519	21.4722	21.6078	22.1293	22.0374	22.0897	1.95278e+06	2.04094e+06	2.48308e+06	2.3821e+06	1.99534e+06	1.47993e+06	NaN	1.02543e+06	1.1208e+06	2.12275e+06	NaN	NaN	5.73714e+06	2.90922e+06	3.19592e+06
Q96CM8	Calponin-3	CNN3	16	16	15	58.7	0	91.849	186	0.000225948	0.000169649	0.703856	3.93666e-05	0.678665	1.05208	1.55023	25.0189	24.5305	25.0723	24.6563	24.8563	24.9826	24.2302	24.3006	24.5481	24.2052	24.0888	24.4209	24.8033	24.8992	24.8513	24.9593	25.179	24.9129	3.39969e+07	2.42335e+07	3.52788e+07	2.64415e+07	3.03733e+07	3.31522e+07	1.96796e+07	2.06638e+07	2.4531e+07	1.93415e+07	1.78423e+07	2.24607e+07	2.92777e+07	3.129e+07	3.02682e+07
P33121;Q9ULC5	2,3-cyclic-nucleotide 3-phosphodiesterase	CNP	20	20	20	55.6	0	75.345	130	6.22725e-07	0.000267457	3.94729e-09	3.39933e-06	1.84381	4.63514	2.51389	24.1013	24.0149	23.8336	23.7496	23.1941	23.313	24.7626	24.5872	24.6403	24.842	24.0775	24.7036	26.2474	25.9614	26.1149	25.798	25.901	25.5976	1.79976e+07	1.69514e+07	1.49496e+07	1.4104e+07	9.59665e+06	1.04211e+07	2.84633e+07	2.52049e+07	2.61499e+07	3.00737e+07	1.77031e+07	2.73228e+07	7.96626e+07	6.53371e+07	7.26722e+07
O95573	Contactin-1	CNTN1	11	11	11	15.2	0	17.692	39	4.24837e-06	7.01339e-07	0.796658	2.83315e-07	3.70959	0.90408	0.243714	21.333	21.9957	21.1733	22.2989	21.4101	21.446	23.6013	23.643	23.1038	23.5541	23.5784	23.7874	21.3974	21.0278	21.0035	21.83	22.0881	21.4602	2.64164e+06	4.18182e+06	2.36482e+06	5.15986e+06	2.78665e+06	2.85686e+06	1.27262e+07	1.30994e+07	9.0144e+06	1.23166e+07	1.25258e+07	1.44784e+07	2.76223e+06	2.13795e+06	2.10225e+06
O60488	Catechol O-methyltransferase	COMT	8	8	8	46.9	0	33.859	52	0.0176356	0.118385	0.253149	0.00483596	1.30972	0.789213	0.60258	22.9991	22.3319	23.4761	23.4282	23.1222	23.2549	23.4391	23.4005	23.3302	23.9101	23.7947	23.2126	22.7755	22.4855	22.9666	23.2381	22.7707	22.4442	8.38338e+06	5.27924e+06	1.16684e+07	1.12873e+07	9.1301e+06	1.00097e+07	1.13729e+07	1.10727e+07	1.05461e+07	1.57637e+07	1.45519e+07	9.72051e+06	7.17974e+06	5.87232e+06	8.19663e+06
P60709;Q9BYX7	Coronin-1A	CORO1A	8	8	8	32.5	0	30.932	78	0.0128922	0.759439	0.0205561	0.00495174	0.950268	1.21668	1.28036	22.5358	22.2074	22.3164	22.3902	22.7373	22.1963	22.3299	22.2697	22.5282	22.3462	22.447	22.053	22.5776	22.6873	22.8182	22.8266	22.5928	22.6351	6.08067e+06	4.84277e+06	5.22283e+06	5.49695e+06	6.99213e+06	4.80565e+06	5.27193e+06	5.05647e+06	6.04873e+06	5.33183e+06	5.71769e+06	4.35125e+06	6.25943e+06	6.75395e+06	7.39542e+06
P68032;P63267;P62736;P68133	Carboxypeptidase D	CPD	14	14	14	15.6	0	37.672	100	0.00526009	0.472193	0.00131006	0.0143231	1.08534	1.4065	1.29591	22.831	22.463	22.9265	23.2977	22.8902	22.5788	23.106	22.8148	22.868	23.1432	22.9746	22.9107	23.582	23.203	23.2597	23.3418	23.3472	23.3277	7.46132e+06	5.78145e+06	7.97194e+06	1.03111e+07	7.77386e+06	6.26464e+06	9.02816e+06	7.37801e+06	7.65515e+06	9.26398e+06	8.24221e+06	7.88511e+06	1.25571e+07	9.65604e+06	1.00431e+07
O96019	Copine-1	CPNE1	15	15	15	35.4	0	109.83	119	0.0209517	0.769113	0.0352287	0.00890829	0.922826	1.30861	1.41805	23.7348	24.126	23.3815	24.1787	24.0001	23.5579	23.8591	24.0956	23.4437	23.6723	23.5553	23.7409	24.4983	24.3466	24.0272	24.0662	24.1345	24.35	1.396e+07	1.83084e+07	1.09278e+07	1.89895e+07	1.67784e+07	1.23491e+07	1.52161e+07	1.79266e+07	1.14092e+07	1.33682e+07	1.23268e+07	1.40192e+07	2.36986e+07	2.13332e+07	1.70965e+07
P12814;P35609;Q08043	Cleavage and polyadenylation specificity factor subunit 7	CPSF7	9	9	9	26.3	0	46.351	83	0.00058076	5.34177e-05	0.0133523	0.030066	1.55953	1.26007	0.807981	22.8854	23.158	23.008	23.0778	23.2243	23.1662	24.0859	23.6806	23.51	23.9615	23.454	23.5847	23.3805	23.4846	23.2935	23.337	23.4188	23.6099	7.74804e+06	9.3595e+06	8.43525e+06	8.8534e+06	9.79966e+06	9.41285e+06	1.78065e+07	1.34453e+07	1.19458e+07	1.63354e+07	1.1491e+07	1.25806e+07	1.09202e+07	1.17373e+07	1.02812e+07
O43707	Cellular retinoic acid-binding protein 2	CRABP2	7	6	6	55.1	0	44.152	31	6.21332e-08	0.896807	9.05273e-10	1.41285e-09	1.07557	24.893	23.1441	NaN	NaN	NaN	NaN	NaN	NaN	NaN	NaN	NaN	NaN	NaN	NaN	24.1681	24.4498	24.7867	23.3899	24.0935	24.1824	NaN	NaN	NaN	NaN	NaN	NaN	NaN	NaN	NaN	NaN	NaN	NaN	1.88505e+07	2.29152e+07	2.89428e+07
Q9NZ32	Dihydropyrimidinase-related protein 1	CRMP1	27	22	22	70.8	0	109.18	326	0.0110531	0.192646	0.0916171	0.00254735	0.865475	1.19553	1.38136	25.6656	25.7667	26.0611	26.0289	26.1294	26.0931	25.5567	25.7185	25.6612	25.794	25.9196	25.8747	26.12	26.0022	26.153	25.9892	26.5653	26.4252	5.3225e+07	5.70886e+07	7.00121e+07	6.84667e+07	7.34063e+07	7.15823e+07	4.93552e+07	5.52128e+07	5.30629e+07	5.81792e+07	6.34713e+07	6.15263e+07	7.29295e+07	6.72113e+07	7.46169e+07
P61163	Cold shock domain-containing protein E1	CSDE1	24	24	24	37.6	0	156.18	226	7.67162e-08	2.77006e-08	3.1414e-10	0.00179972	0.616906	0.513017	0.831598	25.3684	25.4011	25.3718	25.373	25.0896	25.2988	24.8314	24.6267	24.6235	24.478	24.538	24.6212	24.3412	24.2718	24.3401	24.4421	24.2813	24.4604	4.33161e+07	4.43091e+07	4.34183e+07	4.34544e+07	3.57044e+07	4.1276e+07	2.98536e+07	2.59045e+07	2.58471e+07	2.33675e+07	2.43598e+07	2.58059e+07	2.12535e+07	2.02554e+07	2.12373e+07
P42025	Catenin beta-1	CTNNB1	20	20	17	37.5	0	90.149	168	0.000474388	0.0081968	4.08604e-05	0.0359674	1.26577	1.52526	1.205	24.1875	24.2637	24.0423	24.4394	24.0383	23.9572	24.3456	24.4866	24.4287	24.5691	24.369	24.7796	24.5521	24.8199	24.5762	24.9067	24.9408	24.7968	1.91057e+07	2.01419e+07	1.72764e+07	2.27506e+07	1.72286e+07	1.62868e+07	2.13185e+07	2.35072e+07	2.25825e+07	2.48906e+07	2.16671e+07	2.88007e+07	2.45991e+07	2.96165e+07	2.50134e+07
P61160	Catenin delta-1	CTNND1	18	18	18	26.7	0	80.626	237	5.05298e-05	0.00276168	1.83914e-06	0.00242916	1.29563	1.69945	1.31167	24.1152	24.2313	24.1016	24.5762	23.985	24.1975	24.6127	24.7947	24.5424	24.4577	24.5281	24.5641	25.1539	25.0574	24.71	25.063	24.9671	24.8775	1.81718e+07	1.96946e+07	1.80013e+07	2.50134e+07	1.66037e+07	1.92386e+07	2.56543e+07	2.91037e+07	2.44342e+07	2.3041e+07	2.41932e+07	2.48045e+07	3.73318e+07	3.49164e+07	2.74442e+07
P61158;Q9P1U1;Q9C0K3	Cathepsin B;Cathepsin B light chain;Cathepsin B heavy chain	CTSB	13	13	13	51.6	0	117.34	167	4.42645e-08	0.0496717	1.04337e-10	1.17835e-09	1.24689	4.03644	3.2372	24.6277	24.7412	24.7558	24.651	24.5346	24.9004	25.2367	24.9251	24.9239	25.3126	24.9237	24.7436	26.9175	26.8848	26.941	26.4077	26.6634	26.3942	2.59225e+07	2.80442e+07	2.83295e+07	2.63445e+07	2.43025e+07	3.13161e+07	3.9537e+07	3.18568e+07	3.18304e+07	4.16727e+07	3.18259e+07	2.80909e+07	1.26758e+08	1.23917e+08	1.2884e+08
P07311	Src substrate cortactin	CTTN	17	17	17	32.4	0	82.606	166	0.00165018	0.184916	0.000245215	0.00947663	1.25623	1.81461	1.44449	24.0478	23.7444	24.0474	23.9485	23.783	24.0929	24.1799	24.6874	24.2468	24.4525	24.3183	23.5592	24.6631	24.6181	24.7481	24.5401	24.9623	25.2129	1.73424e+07	1.40532e+07	1.73376e+07	1.61889e+07	1.44343e+07	1.78931e+07	1.90053e+07	2.70177e+07	1.99074e+07	2.29581e+07	2.09188e+07	1.23602e+07	2.65664e+07	2.57506e+07	2.81787e+07
O14672	Cytoglobin	CYGB	7	7	7	50.5	0	11.613	28	0.000220086	0.999937	7.25584e-05	7.11813e-05	1.00168	0.535395	0.534495	22.2759	21.52	22.0355	22.1565	21.9801	22.0116	21.9652	22.0518	22.194	22.3502	21.711	21.7171	20.8649	21.1585	21.2151	21.5453	20.8074	20.9543	5.07825e+06	3.00722e+06	4.29879e+06	4.67489e+06	4.13685e+06	4.22816e+06	4.09434e+06	4.34764e+06	4.79799e+06	5.34664e+06	3.43291e+06	3.44745e+06	1.90968e+06	2.34069e+06	2.43434e+06
Q9P0K1	Cytochrome P450 26A1	CYP26A1	5	5	5	12.5	0	7.6982	15	0.00253758	0.760985	0.00322637	0.000790679	0.775813	4.30209	5.54526	NaN	NaN	NaN	NaN	NaN	NaN	NaN	NaN	NaN	NaN	NaN	NaN	22.9772	22.6337	22.5223	21.4224	20.4831	20.4368	NaN	NaN	NaN	NaN	NaN	NaN	NaN	NaN	NaN	NaN	NaN	NaN	8.25708e+06	6.50763e+06	6.02404e+06
P55265	Lanosterol 14-alpha demethylase	CYP51A1	12	12	12	27.4	0	31.898	109	0.0383243	0.526392	0.116545	0.0143938	1.14137	0.797492	0.698717	22.7288	22.9879	22.4681	22.7938	22.9956	22.617	22.5087	23.1794	22.8757	23.1811	22.6082	23.2778	22.7406	22.0603	22.6747	22.5419	22.1957	22.3688	6.95105e+06	8.31855e+06	5.80192e+06	7.27139e+06	8.36306e+06	6.43273e+06	5.96752e+06	9.49937e+06	7.69612e+06	9.51057e+06	6.39361e+06	1.01699e+07	7.00814e+06	4.37333e+06	6.69522e+06
P35611	Dopamine beta-hydroxylase;Soluble dopamine beta-hydroxylase	DBH	29	29	29	59	0	240.83	463	3.51156e-05	0.0249944	1.33276e-06	0.000188356	1.16414	1.55529	1.33599	27.6357	27.572	27.4195	27.7302	27.321	27.5611	27.8513	27.7478	27.6578	27.7878	27.8255	27.7134	28.305	28.1485	27.9009	28.3322	28.1352	28.2369	2.08533e+08	1.99526e+08	1.79511e+08	2.2265e+08	1.67664e+08	1.98024e+08	2.42146e+08	2.25382e+08	2.11752e+08	2.31719e+08	2.37854e+08	2.20072e+08	3.3163e+08	2.97538e+08	2.50615e+08
P35612	Drebrin-like protein	DBNL	14	14	14	41.2	0	168.18	148	0.000130368	2.62159e-05	0.913726	5.33388e-05	0.733047	0.982872	1.3408	24.6757	24.4745	24.592	24.5454	24.5562	24.6587	24.1834	24.0514	24.1929	24.0062	23.9862	24.367	24.5227	24.5856	24.4402	24.6172	24.4095	24.7589	2.67994e+07	2.33109e+07	2.52889e+07	2.44851e+07	2.46691e+07	2.64855e+07	1.90515e+07	1.73857e+07	1.91773e+07	1.68495e+07	1.66175e+07	2.1637e+07	2.41028e+07	2.51769e+07	2.27632e+07
Q9UEY8	Dynactin subunit 1	DCTN1	36	36	36	39.2	0	233.15	327	0.0107296	0.985145	0.00623304	0.00867283	1.00729	1.17851	1.16998	25.0985	24.968	25.2187	25.2092	25.1075	24.9172	25.117	25.2551	24.898	25.1635	25.0951	25.055	25.3493	25.3609	25.1578	25.3222	25.314	25.4474	3.59254e+07	3.28184e+07	3.90468e+07	3.87905e+07	3.61502e+07	3.16829e+07	3.6389e+07	4.00445e+07	3.1264e+07	3.7581e+07	3.58408e+07	3.48583e+07	4.27464e+07	4.30915e+07	3.74328e+07
P11766	dCTP pyrophosphatase 1	DCTPP1	4	4	4	50	0	22.677	18	0.00096161	0.0704074	0.000107792	0.0118654	0.520984	0.239258	0.459243	21.6968	21.0955	21.1904	21.4508	21.5137	21.7837	21.0338	NaN	20.8446	21.0185	NaN	NaN	20.8175	NaN	NaN	NaN	NaN	NaN	3.39929e+06	2.24067e+06	2.39302e+06	2.86638e+06	2.99412e+06	3.61033e+06	2.14686e+06	NaN	1.883e+06	2.12422e+06	NaN	NaN	1.84796e+06	NaN	NaN
P55263	Probable ATP-dependent RNA helicase DDX23	DDX23	12	12	12	16.7	0	19.243	68	0.00559212	0.00124502	0.340039	0.0225544	1.47457	1.13391	0.768977	22.7326	22.5933	22.3213	22.432	22.4036	22.5045	23.384	22.6788	22.7339	23.1535	23.1765	23.1312	22.5853	22.8971	22.8008	22.6625	22.3568	22.75	6.96939e+06	6.32792e+06	5.2406e+06	5.65855e+06	5.54824e+06	5.95017e+06	1.09468e+07	6.71427e+06	6.97567e+06	9.33035e+06	9.48029e+06	9.18724e+06	6.29293e+06	7.81113e+06	7.30676e+06
Q9H2P0	Probable ATP-dependent RNA helicase DDX46	DDX46	18	18	18	19.6	0	50.757	163	0.00103612	0.0684664	0.000119711	0.0137069	0.856087	0.687471	0.803038	24.4422	24.6323	24.2458	24.4335	24.3214	24.4036	24.2595	24.153	23.8093	24.3791	24.133	24.3576	23.7741	23.8807	24.0093	23.8086	24.0671	23.6891	2.27948e+07	2.60053e+07	1.98936e+07	2.26577e+07	2.09638e+07	2.2193e+07	2.00834e+07	1.86542e+07	1.46999e+07	2.18193e+07	1.83974e+07	2.14965e+07	1.43456e+07	1.54457e+07	1.68857e+07
Q9BRR6	Probable ATP-dependent RNA helicase DDX6	DDX6	17	17	17	49.7	0	124.62	207	0.00939197	0.00299506	0.638247	0.0187154	0.775117	0.943368	1.21707	25.1432	25.0044	25.2944	25.48	25.1155	25.0848	24.8422	24.6864	24.6591	24.9549	24.9677	24.8307	24.9845	25.1632	24.8314	25.2487	25.2453	25.1518	3.70559e+07	3.36569e+07	4.11503e+07	4.67998e+07	3.63512e+07	3.55858e+07	3.00779e+07	2.6999e+07	2.64929e+07	3.25217e+07	3.28115e+07	2.98391e+07	3.31959e+07	3.75732e+07	2.98536e+07
Q9NX46	ATP-dependent RNA helicase DHX36	DHX36	7	7	7	10.1	0	24.158	75	0.0175183	0.784817	0.0278376	0.00738574	1.07392	0.754611	0.702668	21.5184	21.3716	21.6441	21.6347	21.7344	21.9173	21.7023	22.0893	21.8306	21.6307	21.7268	21.4348	20.7807	20.9715	21.0353	21.5641	21.2595	21.6313	3.00389e+06	2.71327e+06	3.27735e+06	3.25607e+06	3.48904e+06	3.96063e+06	3.41227e+06	4.46213e+06	3.72963e+06	3.24705e+06	3.47071e+06	2.83477e+06	1.80142e+06	2.05613e+06	2.1491e+06
Q16186	DnaJ homolog subfamily A member 2	DNAJA2	7	7	7	31.1	0	25.605	58	0.0304397	0.0329473	0.951155	0.0182427	0.65632	1.00493	1.53116	22.8285	23.6424	22.4023	22.5315	22.6771	22.6433	22.4769	22.3604	22.2944	22.6252	21.5026	21.9295	22.9201	23.0233	22.5331	22.9181	22.8733	22.8364	7.4484e+06	1.3094e+07	5.54325e+06	6.06258e+06	6.70637e+06	6.55107e+06	5.83742e+06	5.38457e+06	5.14379e+06	6.4694e+06	2.97117e+06	3.99427e+06	7.93666e+06	8.52519e+06	6.06931e+06
P30566	DnaJ homolog subfamily B member 1	DNAJB1	9	9	8	30	0	19.259	90	0.00277035	0.0812851	0.000439222	0.0441316	0.789834	0.616093	0.780029	23.2584	23.166	23.2352	23.7805	23.6567	23.7097	23.2884	23.3657	22.9295	23.136	23.0484	23.0829	22.7819	22.8616	22.3873	23.1072	22.5221	22.9607	1.0034e+07	9.41154e+06	9.87398e+06	1.44093e+07	1.32244e+07	1.37193e+07	1.02449e+07	1.08088e+07	7.98854e+06	9.21786e+06	8.67481e+06	8.88475e+06	7.21166e+06	7.62127e+06	5.48591e+06
P30520;Q8N142	DnaJ homolog subfamily C member 5	DNAJC5	2	2	2	29.8	0	13.376	16	0.0176839	0.966097	0.0171191	0.0103994	0.992472	1.95327	1.96808	NaN	NaN	NaN	NaN	NaN	NaN	NaN	20.0746	NaN	NaN	20.3245	NaN	20.604	19.9901	20.2371	20.8449	20.9192	20.8838	NaN	NaN	NaN	NaN	NaN	NaN	NaN	1.10422e+06	NaN	NaN	1.31306e+06	NaN	1.59376e+06	1.04141e+06	1.23587e+06
Q9Y4W6	DnaJ homolog subfamily C member 9	DNAJC9	9	9	9	41.5	0	22.34	48	4.79131e-05	1.8004e-06	0.000656313	0.0101548	0.302326	0.497744	1.64638	23.4636	23.4425	22.7165	23.5885	23.976	23.2491	21.9706	21.8813	21.5588	21.659	21.9568	21.1943	21.8854	22.3617	22.8044	22.2862	22.8205	22.3117	1.15677e+07	1.13998e+07	6.89204e+06	1.26138e+07	1.65004e+07	9.96957e+06	4.1097e+06	3.86303e+06	3.0892e+06	3.31138e+06	4.07057e+06	2.3995e+06	3.87402e+06	5.38943e+06	7.32501e+06
P52594	Dynamin-1-like protein	DNM1L	29	29	29	55	0	304.34	239	0.000784582	7.85164e-05	0.0166376	0.0367824	0.787253	0.879585	1.11728	24.6869	24.9201	24.7285	24.8911	24.848	24.6819	24.4858	24.5509	24.5291	24.486	24.3149	24.3203	24.5244	24.7203	24.5174	24.6592	24.539	24.6906	2.70083e+07	3.17466e+07	2.77984e+07	3.11149e+07	3.01991e+07	2.69149e+07	2.34942e+07	2.45786e+07	2.421e+07	2.34974e+07	2.08696e+07	2.09479e+07	2.41313e+07	2.76409e+07	2.40145e+07
Q53H12	Dihydropyrimidinase-related protein 3	DPYSL3	35	30	27	78.2	0	323.31	798	0.00238681	0.026622	0.110982	0.000371522	0.797861	1.18925	1.49054	28.4272	28.3556	28.4527	28.5154	28.4869	28.0609	28.0356	28.0327	27.8887	27.9626	27.9529	28.4442	28.4149	28.7334	28.4502	28.4432	28.9096	28.8117	3.60944e+08	3.43468e+08	3.67381e+08	3.83699e+08	3.76194e+08	2.80009e+08	2.75142e+08	2.74589e+08	2.48505e+08	2.61566e+08	2.59813e+08	3.65222e+08	3.5788e+08	4.46288e+08	3.66744e+08
P35573	Dihydropyrimidinase-related protein 4	DPYSL4	18	17	17	47.4	0	50.489	189	0.000189918	1.21258e-05	0.0239649	0.00300017	0.612482	0.809586	1.32181	24.8277	24.7564	24.9264	25.0206	25.1622	24.8582	24.1707	23.9172	23.9813	24.3814	24.4758	24.3324	24.3679	24.5797	24.7161	24.5718	24.7497	24.7394	2.97771e+07	2.83412e+07	3.18856e+07	3.4037e+07	3.75471e+07	3.04133e+07	1.88845e+07	1.58414e+07	1.65612e+07	2.18541e+07	2.33319e+07	2.11243e+07	2.16505e+07	2.50742e+07	2.75605e+07
Q99943	Probable rRNA-processing protein EBP2	EBNA1BP2	2	2	2	7.2	0	3.673	12	0.0181096	0.00845264	0.854548	0.0245463	1.70235	1.12754	0.662346	20.01	20.5532	20.0591	20.4019	20.0198	19.6707	20.788	21.1867	20.7938	21.1667	20.4518	20.9755	19.8436	20.5784	21.1182	19.9475	20.1228	19.8165	1.05587e+06	1.53861e+06	1.09242e+06	1.38543e+06	1.06307e+06	834585	1.81055e+06	2.38689e+06	1.81785e+06	2.35403e+06	1.43419e+06	2.06184e+06	940847	1.56573e+06	2.27621e+06
O00116	Enoyl-CoA delta isomerase 1, mitochondrial	ECI1	8	8	8	40.4	0	58.716	62	0.00169247	0.0508499	0.000222138	0.0360256	1.38013	2.01756	1.46187	21.8093	22.1692	22.1456	22.863	22.9467	22.4901	23.0606	22.8378	22.7789	22.7729	23.3177	22.6837	23.8233	23.5	23.1937	23.0199	23.6661	23.4876	3.67497e+06	4.71622e+06	4.6397e+06	7.62867e+06	8.08435e+06	5.89108e+06	8.74847e+06	7.49657e+06	7.19668e+06	7.16681e+06	1.04551e+07	6.73712e+06	1.48432e+07	1.18633e+07	9.59399e+06
Q6RW13	Eukaryotic translation initiation factor 3 subunit A	EIF3A	33	33	33	26.3	0	129.65	341	0.000885279	0.067966	9.69467e-05	0.0109775	0.867279	0.720894	0.831214	26.1202	25.9447	26.3217	25.975	26.207	26.3742	26.0035	26.0028	25.911	25.9885	25.9721	25.8818	25.7797	25.5192	25.7137	25.9374	25.5351	25.6346	7.29397e+07	6.45852e+07	8.38728e+07	6.5956e+07	7.74628e+07	8.69812e+07	6.72719e+07	6.72392e+07	6.3094e+07	6.65761e+07	6.58235e+07	6.18298e+07	5.76054e+07	4.80889e+07	5.50294e+07
Q8WYP5	Eukaryotic translation initiation factor 3 subunit F	EIF3F	8	8	8	32.8	0	40.263	107	0.000832478	0.0208672	8.51502e-05	0.0321448	0.795651	0.650676	0.817791	24.206	24.0913	24.0515	23.9765	24.311	23.9883	23.9774	23.7588	23.6296	23.7397	23.8794	23.6604	23.2297	23.4334	23.1895	23.6871	23.3962	23.8736	1.93523e+07	1.78733e+07	1.73869e+07	1.65061e+07	2.08133e+07	1.66417e+07	1.65164e+07	1.41942e+07	1.29783e+07	1.40075e+07	1.54318e+07	1.32584e+07	9.83641e+06	1.13281e+07	9.5661e+06
P23526	ELAV-like protein 4	ELAVL4	13	12	3	36.6	0	82.231	160	0.00364939	0.0074627	0.571077	0.000963087	0.807884	1.06539	1.31874	25.5136	25.6166	25.8603	25.8472	25.7891	25.7642	25.3087	25.3479	25.3359	25.369	25.4552	25.7175	25.7735	25.6939	25.6775	25.9473	25.7536	26.0807	4.79026e+07	5.14476e+07	6.09152e+07	6.03646e+07	5.79819e+07	5.69898e+07	4.15602e+07	4.2705e+07	4.23512e+07	4.33341e+07	4.60022e+07	5.51746e+07	5.73583e+07	5.42793e+07	5.36658e+07
O43865;Q96HN2	EMILIN-1	EMILIN1	7	7	7	12.8	0	25.456	37	1.13093e-06	0.000584548	1.03663e-08	7.25571e-06	1.72642	4.02384	2.33074	20.4432	NaN	20.2402	NaN	19.6165	NaN	20.923	20.7565	21.1495	20.6603	21.0365	20.5171	22.1756	22.0055	22.3631	21.6819	22.0864	22.0683	1.42566e+06	NaN	1.23853e+06	NaN	803813	NaN	1.98816e+06	1.77145e+06	2.32613e+06	1.65718e+06	2.15089e+06	1.50059e+06	4.73719e+06	4.21032e+06	5.39466e+06
Q09666	Echinoderm microtubule-associated protein-like 4	EML4	29	29	29	36.1	0	146.65	321	0.000166871	0.180635	0.000419623	1.44169e-05	0.921412	1.25811	1.36541	25.6812	25.7029	25.7416	25.715	25.8512	25.5668	25.5479	25.9012	25.4201	25.6254	25.5159	25.5032	26.067	26.062	26.0792	26.0276	25.9428	26.0776	5.38036e+07	5.4619e+07	5.6104e+07	5.5079e+07	6.05322e+07	4.9702e+07	4.90551e+07	6.26669e+07	4.48965e+07	5.17624e+07	4.7979e+07	4.75585e+07	7.0299e+07	7.00557e+07	7.0896e+07
O95433	Gamma-enolase	ENO2	22	17	16	68.7	0	227.96	299	0.00443327	0.319239	0.0185665	0.000938092	0.923017	1.18943	1.28864	26.4263	26.3047	26.416	26.4066	26.1235	26.3163	26.2449	25.9277	26.4497	26.2121	26.1452	26.2917	26.538	26.5833	26.8035	26.4321	26.5886	26.5453	9.01797e+07	8.28903e+07	8.95382e+07	8.89567e+07	7.31067e+07	8.35595e+07	7.95247e+07	6.38286e+07	9.16543e+07	7.77371e+07	7.42146e+07	8.21467e+07	9.74393e+07	1.00547e+08	1.17127e+08
Q96BJ3	Bifunctional glutamate/proline--tRNA ligase;Glutamate--tRNA ligase;Proline--tRNA ligase	EPRS	62	62	62	54.5	0	244.72	611	0.000182368	0.00225169	1.16292e-05	0.0302122	0.808931	0.704186	0.870514	27.1009	27.1076	27.0904	27.0874	26.9914	27.0179	26.8941	26.7643	26.6839	26.7146	26.7624	26.7356	26.5284	26.3689	26.3215	26.8923	26.5835	26.5961	1.43941e+08	1.44611e+08	1.42897e+08	1.426e+08	1.3342e+08	1.35893e+08	1.24718e+08	1.13987e+08	1.07809e+08	1.10128e+08	1.13837e+08	1.11742e+08	9.6793e+07	8.66622e+07	8.38612e+07
O95831	ELKS/Rab6-interacting/CAST family member 1	ERC1	3	3	3	3.7	0	5.2697	20	0.000875863	0.908517	0.000600381	0.000269478	0.956497	2.74432	2.86914	NaN	NaN	NaN	NaN	NaN	NaN	NaN	NaN	NaN	NaN	NaN	NaN	21.2618	21.1169	NaN	NaN	21.5195	21.16	NaN	NaN	NaN	NaN	NaN	NaN	NaN	NaN	NaN	NaN	NaN	NaN	2.51443e+06	2.27416e+06	NaN
Q12904	3-5 exoribonuclease 1	ERI1	3	3	3	9.7	0	5.6737	18	2.14274e-06	0.945327	1.50716e-07	2.30926e-07	1.06702	5.33423	4.99916	NaN	NaN	NaN	NaN	NaN	NaN	NaN	NaN	NaN	NaN	NaN	NaN	21.5869	21.9973	22.338	21.5344	21.3969	21.2809	NaN	NaN	NaN	NaN	NaN	NaN	NaN	NaN	NaN	NaN	NaN	NaN	3.14996e+06	4.18646e+06	5.30161e+06
Q13155	Electron transfer flavoprotein subunit alpha, mitochondrial	ETFA	10	10	10	47.1	0	68.205	153	9.26778e-05	4.83819e-06	0.000986003	0.0237945	1.77307	1.41226	0.796507	23.8518	23.6959	24.0216	23.6591	23.6946	23.5475	24.6927	24.5093	24.888	24.6333	24.3095	24.3625	24.4658	24.3155	24.0655	24.0757	24.4078	24.1233	1.51394e+07	1.35887e+07	1.70303e+07	1.32464e+07	1.35764e+07	1.22604e+07	2.71171e+07	2.388e+07	3.10481e+07	2.60233e+07	2.07916e+07	2.15697e+07	2.31707e+07	2.08783e+07	1.75565e+07
O00170	Exosome complex component RRP4	EXOSC2	5	5	5	25.9	0	7.4326	18	0.00299841	0.000666207	0.409971	0.00903729	1.43612	1.09131	0.759904	21.2709	20.6785	20.9266	21.0162	21.4559	21.2856	21.8988	21.5003	21.4578	21.7374	21.6885	21.5737	21.2934	21.2288	21.1358	21.2398	21.3554	21.2651	2.53034e+06	1.67822e+06	1.99312e+06	2.12083e+06	2.87653e+06	2.55625e+06	3.91017e+06	2.96644e+06	2.88032e+06	3.49631e+06	3.37978e+06	3.12127e+06	2.57011e+06	2.45757e+06	2.30414e+06
P00568;Q9Y6K8	Exosome complex component RRP41	EXOSC4	6	6	6	28.2	0	60.689	70	0.0142076	0.675659	0.00511949	0.0280363	0.927352	0.703277	0.758371	23.1646	23.2356	22.9386	23.2271	22.7245	23.1844	22.7746	22.7073	22.7362	23.0462	23.3156	23.1937	22.5341	22.561	22.2027	22.8783	22.4387	22.782	9.40242e+06	9.87672e+06	8.03909e+06	9.8187e+06	6.93037e+06	9.53235e+06	7.17526e+06	6.84823e+06	6.9868e+06	8.66159e+06	1.04399e+07	9.59399e+06	6.07351e+06	6.18782e+06	4.82702e+06
P54819	Exosome complex component MTR3	EXOSC6	4	4	4	20.2	0	5.912	27	0.0377238	0.999809	0.0308082	0.0297141	1.00363	0.803632	0.800722	21.8383	22.2137	21.828	21.8726	21.6271	21.8488	21.7185	21.8108	21.9284	21.6133	21.9308	22.2389	21.5836	21.6975	21.5586	21.6528	21.259	21.6091	3.74959e+06	4.86396e+06	3.72291e+06	3.8398e+06	3.23896e+06	3.77698e+06	3.4508e+06	3.67879e+06	3.99122e+06	3.20813e+06	3.99787e+06	4.94967e+06	3.14276e+06	3.40093e+06	3.08877e+06
Q9UIJ7	Exosome complex component RRP43	EXOSC8	6	6	6	31.2	0	46.333	80	0.00450757	0.248424	0.000900328	0.0249643	0.887958	0.721041	0.812021	22.7602	22.7292	22.5627	22.8725	22.9952	22.6093	22.3884	22.5821	22.585	22.5791	22.4818	22.8808	22.2237	22.1887	22.1847	22.4954	22.0217	22.5558	7.104e+06	6.95298e+06	6.19512e+06	7.67907e+06	8.36074e+06	6.39849e+06	5.4901e+06	6.27899e+06	6.29162e+06	6.26594e+06	5.85728e+06	7.72338e+06	4.89779e+06	4.7804e+06	4.76716e+06
P27144	Protein FAM76B	FAM76B	4	4	4	17.4	0	3.8779	13	0.0134051	0.112884	0.197317	0.00332092	0.649997	1.36636	2.1021	NaN	NaN	19.9459	NaN	NaN	NaN	NaN	20.0091	NaN	NaN	NaN	NaN	20.7907	20.4255	20.4057	20.3262	20.288	20.0363	NaN	NaN	1.00998e+06	NaN	NaN	NaN	NaN	1.05521e+06	NaN	NaN	NaN	NaN	1.81395e+06	1.40828e+06	1.38908e+06
O43823	Phenylalanine--tRNA ligase alpha subunit	FARSA	6	6	6	17.1	0	18.362	40	0.000532896	0.00887815	4.80813e-05	0.039778	0.686196	0.509512	0.742517	22.7648	23.1122	22.9097	22.6974	23.3232	23.3944	22.0614	22.85	22.4164	22.6777	22.3361	22.6131	22.0465	22.1319	22.3809	22.1738	22.0158	21.6694	7.12669e+06	9.06704e+06	7.87965e+06	6.8014e+06	1.0495e+07	1.1026e+07	4.37666e+06	7.56024e+06	5.59769e+06	6.70916e+06	5.29464e+06	6.41537e+06	4.33169e+06	4.59585e+06	5.46163e+06
P14550	Phenylalanine--tRNA ligase beta subunit	FARSB	17	17	17	35.8	0	39.014	141	5.95365e-06	0.000331721	1.01823e-07	0.000350928	0.728455	0.525651	0.721597	24.6348	24.673	24.6092	24.6751	24.7869	24.9748	24.0925	24.2421	24.2921	24.1956	24.099	24.6469	23.7975	23.581	23.8651	23.8995	23.8445	23.811	2.60504e+07	2.67493e+07	2.55922e+07	2.67883e+07	2.89468e+07	3.29734e+07	1.78881e+07	1.98426e+07	2.05424e+07	1.92133e+07	1.79689e+07	2.62698e+07	1.45801e+07	1.25484e+07	1.52796e+07
P15121;C9JRZ8	Fatty acid synthase;[Acyl-carrier-protein] S-acetyltransferase;[Acyl-carrier-protein] S-malonyltransferase;3-oxoacyl-[acyl-carrier-protein] synthase;3-oxoacyl-[acyl-carrier-protein] reductase;3-hydroxyacyl-[acyl-carrier-protein] dehydratase;Enoyl-[acyl-carrier-protein] reductase;Oleoyl-[acyl-carrier-protein] hydrolase	FASN	104	104	104	54.2	0	323.31	1317	0.0013886	0.503022	0.000281918	0.00262608	0.931407	0.732156	0.786076	28.0629	28.1115	28.2477	28.2665	28.2753	28.1869	28.0674	28.0353	28.0356	28.0556	28.1987	28.1484	27.6952	27.4762	27.458	28.1025	27.8333	27.7972	2.80398e+08	2.90004e+08	3.18717e+08	3.22897e+08	3.24873e+08	3.05564e+08	2.81274e+08	2.75085e+08	2.75142e+08	2.78983e+08	3.08074e+08	2.97518e+08	2.17313e+08	1.86707e+08	1.84366e+08
O43488;Q8NHP1;O95154	rRNA 2-O-methyltransferase fibrillarin	FBL	9	9	8	34.9	0	44.755	119	0.00272066	0.0919114	0.0381288	0.000432248	1.1894	0.8256	0.694131	23.8616	23.9816	23.9771	23.9923	24.1082	24.0079	24.3056	24.3663	23.8592	24.3036	24.1726	24.3711	23.4145	23.6158	24.0973	23.6658	23.8366	23.547	1.52425e+07	1.65646e+07	1.6513e+07	1.66879e+07	1.80839e+07	1.68693e+07	2.07355e+07	2.16265e+07	1.52172e+07	2.07068e+07	1.89094e+07	2.16986e+07	1.11806e+07	1.28548e+07	1.79478e+07
P31749;Q9Y243	Filamin-A	FLNA	97	97	91	54.6	0	323.31	1296	0.00718826	0.916485	0.00317449	0.0070603	1.01758	1.19965	1.17893	27.8923	28.0495	28.2013	27.9891	28.0177	27.9448	27.9631	28.0439	28.0713	27.9701	28.2059	27.9966	28.1633	28.0942	28.2497	28.4133	28.4442	28.2931	2.49126e+08	2.77806e+08	3.08629e+08	2.66415e+08	2.71749e+08	2.58359e+08	2.61657e+08	2.76729e+08	2.82035e+08	2.62929e+08	3.09615e+08	2.67804e+08	3.00606e+08	2.86548e+08	3.19159e+08
Q13740	Filamin-B	FLNB	97	93	91	56	0	323.31	775	2.33324e-08	0.693818	5.49375e-11	1.08246e-10	1.03947	2.3045	2.21699	26.1841	26.2862	26.2863	26.4216	26.2558	26.0449	26.2106	26.1982	26.2119	26.3178	26.4632	26.416	27.3086	27.3852	27.6267	27.4077	27.4385	27.5428	7.62429e+07	8.18342e+07	8.18398e+07	8.98864e+07	8.01278e+07	6.92303e+07	7.76563e+07	7.69917e+07	7.77263e+07	8.36464e+07	9.2516e+07	8.95382e+07	1.66229e+08	1.75294e+08	2.07236e+08
Q8IZ83	Flotillin-1	FLOT1	19	19	19	54.8	0	94.294	209	4.42645e-08	2.47774e-09	7.41386e-11	0.00525198	2.0741	2.5491	1.22902	23.776	23.8677	23.963	23.7652	23.5519	23.722	25.0038	24.8054	24.8519	24.7708	24.812	24.7343	25.2563	25.171	25.033	24.8299	25.2422	25.2016	1.43645e+07	1.53071e+07	1.63524e+07	1.42573e+07	1.22978e+07	1.38367e+07	3.36429e+07	2.93204e+07	3.02808e+07	2.86255e+07	2.94548e+07	2.79104e+07	4.00778e+07	3.77769e+07	3.43308e+07
P54886	Flotillin-2	FLOT2	18	18	18	48.4	0	53.652	145	8.2979e-06	1.26188e-05	2.48798e-07	0.0488267	2.19981	2.92153	1.32809	23.2375	23.1474	23.1158	23.7054	23.5334	23.0985	24.512	24.7319	24.354	24.6339	24.5674	23.8012	24.9208	24.7592	24.5301	25.0174	25.2075	24.6957	9.88973e+06	9.29098e+06	9.08969e+06	1.36784e+07	1.21411e+07	8.98134e+06	2.39247e+07	2.7864e+07	2.14429e+07	2.60341e+07	2.48613e+07	1.46176e+07	3.1762e+07	2.83963e+07	2.42268e+07
P30837	Fragile X mental retardation syndrome-related protein 2	FXR2	12	9	9	25.3	0	31.449	57	8.11281e-05	0.00115916	3.83302e-06	0.0151167	0.677214	0.506993	0.748645	23.0152	23.0691	22.7932	22.9844	22.9876	22.8822	22.7205	21.9238	22.4056	22.2943	22.3189	22.5845	21.9865	22.2922	21.5396	22.109	21.9804	21.8527	8.47746e+06	8.80017e+06	7.26837e+06	8.29839e+06	8.31682e+06	7.73087e+06	6.91118e+06	3.97852e+06	5.55594e+06	5.14343e+06	5.23189e+06	6.28944e+06	4.15524e+06	5.13595e+06	3.04836e+06
P05091;O94788;P47895	Ras GTPase-activating protein-binding protein 1	G3BP1	12	12	12	35.2	0	82.783	158	1.26614e-06	9.04948e-07	2.18204e-08	0.030948	0.653989	0.570507	0.872349	25.4535	25.1588	25.1951	25.1066	25.1437	25.2686	24.726	24.6605	24.6016	24.4618	24.6351	24.5803	24.44	24.4385	24.131	24.4514	24.5549	24.4465	4.5948e+07	3.74588e+07	3.84132e+07	3.61276e+07	3.70687e+07	4.0421e+07	2.77503e+07	2.65186e+07	2.54577e+07	2.31066e+07	2.60558e+07	2.50846e+07	2.276e+07	2.27364e+07	1.83719e+07
P51648	Ras GTPase-activating protein-binding protein 2	G3BP2	8	8	8	16.2	0	31.012	88	0.00104712	0.0754289	0.000123072	0.012717	1.23202	1.59702	1.29626	23.4125	23.5978	23.6049	23.1717	23.7247	23.5446	23.8387	24.0623	23.8881	23.7446	24.0195	23.2249	24.1927	24.2447	24.1775	24.1478	24.2427	24.1631	1.11652e+07	1.26954e+07	1.2758e+07	9.4488e+06	1.38627e+07	1.22358e+07	1.50025e+07	1.75176e+07	1.55251e+07	1.40552e+07	1.70055e+07	9.80373e+06	1.91747e+07	1.98784e+07	1.89737e+07
P30038	Galanin peptides;Galanin;Galanin message-associated peptide	GAL	2	2	2	13	0	3.5317	24	0.0020873	0.166476	0.0145114	0.000325319	0.596581	2.8935	4.85014	NaN	NaN	NaN	NaN	NaN	NaN	NaN	NaN	NaN	NaN	NaN	NaN	21.716	21.4579	21.5959	NaN	21.4782	21.7627	NaN	NaN	NaN	NaN	NaN	NaN	NaN	NaN	NaN	NaN	NaN	NaN	3.44483e+06	2.88052e+06	3.16967e+06
P51649	Neutral alpha-glucosidase AB	GANAB	45	45	45	53.5	0	260.89	943	6.86517e-06	6.46238e-05	1.29577e-07	0.002856	1.29449	1.54254	1.19162	27.8294	27.684	27.6095	27.5375	27.4889	27.5833	28.1212	27.8727	28.0329	27.9489	28.0285	27.9762	28.3184	28.3209	28.111	28.238	28.3827	28.1172	2.38498e+08	2.15633e+08	2.0478e+08	1.94811e+08	1.88358e+08	2.01095e+08	2.91961e+08	2.45764e+08	2.74627e+08	2.59094e+08	2.73791e+08	2.64043e+08	3.34725e+08	3.35305e+08	2.89904e+08
Q02252	Neuromodulin	GAP43	7	7	7	65.1	0	56.51	89	0.0128922	0.00418155	0.599161	0.0294643	1.48682	1.09487	0.736386	23.9247	23.5979	23.3469	23.9407	23.9582	23.6673	24.8809	24.2762	23.9259	24.0897	24.2238	24.3778	24.1161	23.7573	23.7121	23.9236	23.8693	23.9075	1.5924e+07	1.26963e+07	1.06688e+07	1.61016e+07	1.62981e+07	1.33219e+07	3.08956e+07	2.03172e+07	1.59373e+07	1.78535e+07	1.95925e+07	2.17996e+07	1.81832e+07	1.41795e+07	1.37421e+07
P49419	Trifunctional purine biosynthetic protein adenosine-3;Phosphoribosylamine--glycine ligase;Phosphoribosylformylglycinamidine cyclo-ligase;Phosphoribosylglycinamide formyltransferase	GART	26	26	26	40	0	93.931	296	9.72663e-06	0.000106254	2.15487e-07	0.0035517	0.730599	0.59338	0.812182	26.2261	25.9532	26.4106	26.1247	26.2138	26.2163	25.7919	25.7766	25.6661	25.7541	25.645	25.8235	25.4529	25.3871	25.1617	25.6233	25.411	25.5833	7.84951e+07	6.49668e+07	8.92037e+07	7.31675e+07	7.78288e+07	7.79637e+07	5.80946e+07	5.74817e+07	5.32434e+07	5.65922e+07	5.24704e+07	5.93811e+07	4.59289e+07	4.38812e+07	3.75341e+07
P49189	Glutamate dehydrogenase 1, mitochondrial;Glutamate dehydrogenase 2, mitochondrial	GLUD1;GLUD2	24	24	24	53.2	0	63.802	251	1.07767e-06	8.38773e-05	8.67006e-09	3.15524e-05	1.27957	1.68168	1.31426	25.4159	25.2924	25.3701	25.4147	25.2676	25.4864	25.7176	25.7113	25.7322	25.6391	25.728	25.856	26.1837	26.2678	25.9872	25.9844	26.2949	26.0034	4.4766e+07	4.10933e+07	4.33672e+07	4.47288e+07	4.03929e+07	4.70079e+07	5.51784e+07	5.4938e+07	5.57396e+07	5.22562e+07	5.55776e+07	6.0734e+07	7.62218e+07	8.07971e+07	6.65161e+07
P04075;P05062	Guanine nucleotide-binding protein G(I)/G(S)/G(O) subunit gamma-2	GNG2	3	3	3	59.2	0	11.837	26	0.000518074	0.0691801	4.87707e-05	0.00500471	1.70622	5.47742	3.21026	NaN	21.6618	21.9073	NaN	21.842	22.1697	22.244	22.3107	22.1139	22.086	21.7129	22.7349	23.4718	23.2001	23.9233	24.3122	24.2593	24.0074	NaN	3.31781e+06	3.93328e+06	NaN	3.75922e+06	4.71786e+06	4.9672e+06	5.20223e+06	4.53886e+06	4.45193e+06	3.43743e+06	6.98051e+06	1.16336e+07	9.63665e+06	1.59086e+07
P09972	Guanine nucleotide-binding protein G(I)/G(S)/G(O) subunit gamma-4	GNG4	2	2	2	44	0	4.2843	9	0.000614716	0.000517088	0.78895	0.000148116	2.81529	0.874748	0.310713	20.2634	NaN	NaN	20.0398	NaN	20.2432	20.9932	22.2215	20.7823	21.8829	21.3792	20.4769	NaN	NaN	NaN	NaN	19.8626	19.6351	1.25861e+06	NaN	NaN	1.07791e+06	NaN	1.24111e+06	2.08729e+06	4.89033e+06	1.80342e+06	3.86731e+06	2.7276e+06	1.45936e+06	NaN	NaN	NaN
Q9Y673	Guanine nucleotide-binding protein-like 1	GNL1	12	12	12	27.8	0	41.405	119	0.0138491	0.00548247	0.761677	0.0225426	0.798664	0.957538	1.19892	22.8927	23.3073	23.0595	23.2434	23.2428	23.2866	22.6994	22.6678	22.9075	22.9345	22.8698	23.0189	22.9304	22.9196	23.1807	23.2772	23.1781	23.1773	7.78734e+06	1.038e+07	8.74181e+06	9.93026e+06	9.92613e+06	1.02321e+07	6.81083e+06	6.66327e+06	7.86764e+06	8.01627e+06	7.66471e+06	8.49923e+06	7.99352e+06	7.93391e+06	9.50793e+06
Q9H6U8	Guanine nucleotide-binding protein-like 3	GNL3	4	4	4	11.5	0	6.383	11	0.00756201	0.927182	0.00726069	0.00344996	1.05259	0.608997	0.57857	20.4138	20.3526	20.535	20.7475	20.8759	20.4178	20.4797	20.7213	20.646	20.6236	20.601	20.7748	NaN	20.0837	20.388	NaN	NaN	NaN	1.3969e+06	1.33888e+06	1.51933e+06	1.76043e+06	1.9243e+06	1.40078e+06	1.46219e+06	1.72875e+06	1.64084e+06	1.61556e+06	1.59045e+06	1.79406e+06	NaN	1.11121e+06	1.37214e+06
Q9UM73	Growth factor receptor-bound protein 2	GRB2	7	7	7	41	0	48.463	73	0.000194955	0.593559	0.00016954	2.8614e-05	1.06916	0.71772	0.671292	22.7882	22.8667	22.8866	22.9197	22.958	22.7613	23.1096	22.852	23.0647	23.1355	22.929	22.6125	22.1306	22.3704	22.4823	22.3048	22.5882	22.4012	7.24322e+06	7.64826e+06	7.75449e+06	7.93446e+06	8.14792e+06	7.10942e+06	9.05071e+06	7.57072e+06	8.77337e+06	9.21466e+06	7.98577e+06	6.4127e+06	4.59171e+06	5.42202e+06	5.85931e+06
Q86V81	G-rich sequence factor 1	GRSF1	13	13	13	40.2	0	35.657	94	0.0189766	0.684216	0.00726583	0.038243	0.890556	0.629496	0.706857	24.8995	25.0135	24.006	24.7722	24.7337	24.2886	24.4296	24.5675	24.7773	23.9592	24.3521	24.724	24.3506	23.9315	23.7195	23.8527	23.9112	24.1013	3.12965e+07	3.38699e+07	1.68471e+07	2.86533e+07	2.78988e+07	2.04926e+07	2.25966e+07	2.48631e+07	2.87548e+07	1.63094e+07	2.14147e+07	2.77119e+07	2.13925e+07	1.59992e+07	1.38128e+07
Q01433	Glycogen synthase kinase-3 beta	GSK3B	5	5	5	27.6	0	16.617	40	0.00644278	0.00147269	0.347809	0.0258002	0.596091	0.862205	1.44643	22.1742	22.5961	22.7756	22.4949	22.4828	22.2909	21.4336	21.9097	21.8273	21.7879	21.3462	21.9938	22.0458	22.4658	22.0502	22.0487	21.8303	22.8913	4.73259e+06	6.34021e+06	7.18024e+06	5.91071e+06	5.86134e+06	5.13133e+06	2.83241e+06	3.93982e+06	3.72111e+06	3.62086e+06	2.66592e+06	4.17632e+06	4.32959e+06	5.79268e+06	4.34282e+06
Q9UJX3	General transcription factor 3C polypeptide 3	GTF3C3	13	13	13	23.4	0	43.257	55	0.00850562	0.00200131	0.324662	0.0383514	1.6207	1.19535	0.737554	21.8067	21.5862	21.7754	21.5212	22.4898	21.6634	22.7453	22.5277	22.4737	22.4761	22.5426	22.4742	22.3116	21.7789	21.8462	22.3449	21.6006	22.5085	3.66835e+06	3.14843e+06	3.58962e+06	3.00972e+06	5.88985e+06	3.32149e+06	7.03101e+06	6.04663e+06	5.82449e+06	5.83419e+06	6.1094e+06	5.82651e+06	5.20548e+06	3.59834e+06	3.77017e+06
Q01484;Q12955	Beta-glucuronidase	GUSB	8	8	8	18.3	0	26.93	58	0.012286	0.723768	0.00452325	0.0212152	1.21166	2.37194	1.95759	21.0657	21.5491	22.4611	22.0878	20.6706	20.6754	22.2793	22.289	21.3821	21.3866	22.4491	20.4275	22.7986	22.788	22.4756	22.9059	22.8503	23.0842	2.19486e+06	3.0685e+06	5.77384e+06	4.45749e+06	1.66905e+06	1.67462e+06	5.09023e+06	5.12457e+06	2.73309e+06	2.74163e+06	5.72601e+06	1.41023e+06	7.29562e+06	7.24222e+06	5.83216e+06
Q9P2R3	GDH/6PGL endoplasmic bifunctional protein;Glucose 1-dehydrogenase;6-phosphogluconolactonase	H6PD	5	5	5	9.1	0	29.342	29	0.000920498	0.0345756	9.77135e-05	0.0224898	1.48854	2.2613	1.51914	20.8491	20.3973	19.6194	20.5875	20.6117	19.8434	21.4366	21.2292	21.0676	20.6674	20.587	20.4798	21.7487	21.6662	21.3337	21.626	21.4929	21.4408	1.88888e+06	1.38102e+06	805430	1.57563e+06	1.60229e+06	940716	2.83831e+06	2.45825e+06	2.19776e+06	1.66536e+06	1.57509e+06	1.46229e+06	3.5238e+06	3.32794e+06	2.64292e+06
O15084;Q8N8A2	HEAT repeat-containing protein 1;HEAT repeat-containing protein 1, N-terminally processed	HEATR1	24	24	24	16.1	0	61.89	101	0.0221133	0.00976485	0.795408	0.0351599	1.63783	1.1236	0.686027	22.2692	22.8488	22.705	22.0329	22.3131	22.8082	23.3376	23.2718	23.2111	23.3144	23.4737	22.7228	22.6914	22.3737	21.9	23.3148	22.7097	22.8119	5.05472e+06	7.55395e+06	6.83732e+06	4.29105e+06	5.2109e+06	7.34433e+06	1.06003e+07	1.01277e+07	9.7104e+06	1.04312e+07	1.1649e+07	6.9222e+06	6.77317e+06	5.43444e+06	3.91342e+06
Q4KMQ2	Hexokinase-1	HK1	38	38	36	42.4	0	206.77	427	0.00238681	0.00036841	0.103329	0.0285668	1.39736	1.15293	0.825072	25.685	25.6771	26.0078	26.0446	26.0048	26.1615	26.2248	26.4967	26.2477	26.4256	26.5476	26.5654	26.1149	26.1413	25.9338	26.349	26.2332	26.0745	5.39455e+07	5.36509e+07	6.74727e+07	6.92159e+07	6.73325e+07	7.50579e+07	7.84244e+07	9.46894e+07	7.96792e+07	9.0136e+07	9.80898e+07	9.93075e+07	7.26722e+07	7.40143e+07	6.40991e+07
P39687;O95626;O43423	Hydroxymethylglutaryl-CoA lyase, mitochondrial	HMGCL	4	4	4	16.6	0	16.057	43	6.43712e-05	0.000777209	2.7611e-06	0.0149214	1.77682	2.50981	1.41253	20.3547	20.1249	20.3173	20.4515	20.4108	20.6787	21.4286	21.2447	21.8378	20.8566	20.9993	20.6902	21.8578	21.8947	21.4519	21.4731	21.7004	21.9087	1.34083e+06	1.1434e+06	1.30652e+06	1.43389e+06	1.394e+06	1.67845e+06	2.82261e+06	2.4848e+06	3.74829e+06	1.89873e+06	2.09613e+06	1.69188e+06	3.80061e+06	3.89907e+06	2.86857e+06
Q92688	Hydroxymethylglutaryl-CoA synthase, cytoplasmic	HMGCS1	6	6	6	19.2	0	15.98	27	0.000518074	0.0338912	4.56345e-05	0.00988446	0.49732	0.148155	0.297907	21.7027	21.9887	22.556	22.6238	22.2167	22.262	21.6081	20.7909	21.6503	21.6206	21.5401	NaN	NaN	NaN	NaN	NaN	NaN	NaN	3.41322e+06	4.16158e+06	6.16641e+06	6.46312e+06	4.87409e+06	5.02956e+06	3.19658e+06	1.8142e+06	3.29147e+06	3.2244e+06	3.04941e+06	NaN	NaN	NaN	NaN
Q9BTT0	Heterogeneous nuclear ribonucleoprotein A3	HNRNPA3	27	27	27	51.9	0	205.6	452	1.49252e-05	4.53156e-05	5.00999e-07	0.0308757	1.71757	2.1873	1.27348	26.9409	26.8391	27.0271	26.6447	26.4833	26.5214	27.704	27.5706	27.3559	27.6405	27.7457	27.1128	27.8045	27.8898	27.6188	27.8643	27.9328	28.1562	1.28831e+08	1.20053e+08	1.36763e+08	1.04919e+08	9.3814e+07	9.63245e+07	2.18643e+08	1.99332e+08	1.7177e+08	2.09228e+08	2.25055e+08	1.45133e+08	2.34417e+08	2.48695e+08	2.06104e+08
P50995	Heterogeneous nuclear ribonucleoprotein U-like protein 2	HNRNPUL2	32	32	32	43.4	0	140.9	330	3.93349e-05	0.0010945	1.33672e-06	0.00403626	1.22655	1.45525	1.18645	26.0173	26.1742	25.9104	26.0722	26.0799	25.9129	26.5202	26.3736	26.0947	26.3388	26.294	26.299	26.461	26.5618	26.4695	26.6143	26.6544	26.6585	6.79184e+07	7.57215e+07	6.30678e+07	7.05528e+07	7.09304e+07	6.31772e+07	9.62444e+07	8.6945e+07	7.16618e+07	8.48729e+07	8.22778e+07	8.25635e+07	9.23751e+07	9.906e+07	9.29209e+07
P07355;A6NMY6	Heat shock protein HSP 90-alpha	HSP90AA1	63	42	41	70.6	0	323.31	1347	0.00939197	0.557787	0.00276709	0.022523	0.958746	0.851415	0.888051	29.4587	29.3382	29.4303	29.3347	29.4299	29.255	29.4205	29.2305	29.2593	29.2473	29.3292	29.3945	29.1275	29.0369	28.9662	29.1814	29.1705	29.3515	7.37823e+08	6.78701e+08	7.23441e+08	6.77056e+08	7.2324e+08	6.40667e+08	7.18543e+08	6.29879e+08	6.4258e+08	6.37257e+08	6.7448e+08	7.0571e+08	5.86477e+08	5.5078e+08	5.24439e+08
P09525	Heat shock 70 kDa protein 1B;Heat shock 70 kDa protein 1A	HSPA1B;HSPA1A	38	35	20	70	0	323.31	585	0.00186784	0.780822	0.00209025	0.000554585	1.05433	0.75776	0.718713	27.5599	27.6919	27.6544	27.5366	27.6442	27.7054	27.5725	27.5966	27.9789	27.4344	27.7561	27.8502	27.1644	26.9708	27.0358	27.2808	27.3798	27.4968	1.97859e+08	2.16817e+08	2.11253e+08	1.9469e+08	2.09765e+08	2.18855e+08	1.99595e+08	2.02957e+08	2.64538e+08	1.81375e+08	2.26683e+08	2.41961e+08	1.50418e+08	1.31528e+08	1.3759e+08
P08758	Heat shock 70 kDa protein 4L	HSPA4L	19	15	15	31.6	0	55.675	96	0.0368926	0.0245595	0.978679	0.0360766	1.30363	1.02056	0.782857	22.6429	23.2378	23.1116	23.3437	23.0041	23.0581	23.4561	23.3715	23.2264	23.4848	23.7437	23.4574	23.1298	23.0009	22.6728	23.4446	23.2686	23.0377	6.54926e+06	9.89179e+06	9.06327e+06	1.06452e+07	8.41248e+06	8.73333e+06	1.15077e+07	1.08523e+07	9.81393e+06	1.17389e+07	1.40464e+07	1.15181e+07	9.17833e+06	8.39384e+06	6.68641e+06
P08133	78 kDa glucose-regulated protein	HSPA5	48	47	47	62.5	0	323.31	1243	6.52204e-05	0.00154606	2.70196e-06	0.00721205	1.18771	1.37114	1.15444	29.1378	29.1993	29.2083	29.2471	29.1436	29.1024	29.3476	29.4338	29.326	29.397	29.4967	29.5208	29.6947	29.5968	29.3527	29.6981	29.6594	29.7409	5.90679e+08	6.16404e+08	6.20261e+08	6.37169e+08	5.93059e+08	5.76362e+08	6.83137e+08	7.25198e+08	6.72985e+08	7.06934e+08	7.57515e+08	7.70276e+08	8.68951e+08	8.11941e+08	6.85556e+08
P20073	Heat shock cognate 71 kDa protein	HSPA8	54	54	41	81.7	0	323.31	2177	0.00058151	0.0774167	5.85115e-05	0.00543473	0.858644	0.674728	0.785807	30.8318	30.7645	30.9692	30.7801	30.7697	30.7096	30.4895	30.5372	30.5811	30.3819	30.633	30.8525	30.1294	30.171	29.9792	30.0943	30.5729	30.4007	1.91116e+09	1.82405e+09	2.10212e+09	1.84388e+09	1.83064e+09	1.75594e+09	1.50749e+09	1.55816e+09	1.60631e+09	1.39915e+09	1.66514e+09	1.93878e+09	1.1745e+09	1.20886e+09	1.05837e+09
Q10567	Stress-70 protein, mitochondrial	HSPA9	38	38	38	61.3	0	291.49	596	0.00781633	0.123215	0.096447	0.0015843	1.11158	0.89897	0.808728	27.508	27.4778	27.4887	27.649	27.4671	27.5131	27.7105	27.7113	27.5163	27.5848	27.6538	27.8298	27.3841	27.3588	27.0182	27.4595	27.4839	27.4365	1.90868e+08	1.86914e+08	1.88332e+08	2.10464e+08	1.85533e+08	1.91544e+08	2.1963e+08	2.19752e+08	1.91969e+08	2.01304e+08	2.11166e+08	2.38564e+08	1.7516e+08	1.72115e+08	1.35922e+08
O43747	Hsp70-binding protein 1	HSPBP1	8	8	8	31.8	0	55	108	5.80599e-05	0.00103259	2.30602e-06	0.00884018	0.655	0.466887	0.712805	23.4136	23.2787	23.8162	23.5879	23.7473	23.8208	22.93	22.5347	23.3147	23.278	23.04	22.848	22.4436	22.5713	22.2104	22.6587	22.5226	22.6987	1.11737e+07	1.01762e+07	1.47703e+07	1.26086e+07	1.40815e+07	1.48175e+07	7.99131e+06	6.07604e+06	1.04334e+07	1.01713e+07	8.62444e+06	7.54976e+06	5.70423e+06	6.23216e+06	4.85285e+06
Q9BXS5;Q9Y6Q5	60 kDa heat shock protein, mitochondrial	HSPD1	56	56	56	83.1	0	323.31	1568	0.015176	0.0221966	0.811762	0.00646283	1.19459	0.969398	0.81149	29.2424	29.295	29.1605	29.3792	29.3532	29.0869	29.3935	29.4371	29.5096	29.514	29.5207	29.6858	29.2863	29.1584	28.8102	29.3454	29.3735	29.2265	6.35096e+08	6.58679e+08	6.00047e+08	6.98265e+08	6.85794e+08	5.70203e+08	7.05221e+08	7.26859e+08	7.64319e+08	7.66654e+08	7.70222e+08	8.63607e+08	6.54719e+08	5.99174e+08	4.70689e+08
O95782	10 kDa heat shock protein, mitochondrial	HSPE1	9	9	9	75.5	0	27.807	96	1.46912e-05	3.65024e-07	0.000385177	0.00194336	1.84198	1.38994	0.754592	25.0594	25.2417	25.2681	24.9293	24.757	25.2359	26.1056	25.9812	25.8641	25.9353	26.1701	25.7538	25.6374	25.5826	25.3242	25.6116	25.6728	25.559	3.49648e+07	3.96743e+07	4.04069e+07	3.19497e+07	2.8353e+07	3.95151e+07	7.22052e+07	6.624e+07	6.10759e+07	6.41657e+07	7.55066e+07	5.65804e+07	5.21947e+07	5.02493e+07	4.20091e+07
O94973	Heat shock protein 105 kDa	HSPH1	46	46	43	54.8	0	323.31	501	9.91315e-05	0.00197501	5.14749e-06	0.0128145	0.772289	0.637578	0.825569	27.122	27.0208	27.1743	27.214	27.231	27.1376	26.7423	26.7743	26.626	26.8324	26.7909	26.893	26.3573	26.3933	26.195	26.882	26.4797	26.6061	1.46061e+08	1.36167e+08	1.51454e+08	1.55679e+08	1.57524e+08	1.47649e+08	1.12262e+08	1.1478e+08	1.03568e+08	1.19497e+08	1.16109e+08	1.24623e+08	8.59682e+07	8.81404e+07	7.68211e+07
P63010	Isoamyl acetate-hydrolyzing esterase 1 homolog	IAH1	5	5	5	33.9	0	20.508	96	0.00871732	0.0124837	0.77688	0.00318163	0.819187	1.04453	1.27508	22.6575	22.5929	22.5527	22.5291	22.8311	22.7439	22.6575	22.4562	22.2099	22.2402	22.4257	22.1511	22.5709	22.6311	22.5799	22.8937	22.7171	22.8791	6.61587e+06	6.32617e+06	6.15232e+06	6.0525e+06	7.46184e+06	7.02419e+06	6.61587e+06	5.75426e+06	4.85117e+06	4.95413e+06	5.63389e+06	4.65742e+06	6.23043e+06	6.49591e+06	6.26942e+06
Q96CW1	Isoleucine--tRNA ligase, cytoplasmic	IARS	35	35	35	36	0	210.9	405	0.0111791	0.85205	0.00472852	0.0139854	0.956916	0.755458	0.789472	25.5427	25.459	25.8477	25.7147	25.9148	25.7596	25.7193	25.5931	25.4748	25.6804	25.8286	25.5877	25.1787	25.1165	24.989	25.6618	25.3439	25.4667	4.88786e+07	4.61235e+07	6.03855e+07	5.50676e+07	6.32604e+07	5.68084e+07	5.52434e+07	5.06163e+07	4.66315e+07	5.37738e+07	5.95914e+07	5.04272e+07	3.7979e+07	3.63764e+07	3.32996e+07
O00203	Isocitrate dehydrogenase [NADP] cytoplasmic	IDH1	18	17	17	51.7	0	52.829	158	0.0383487	0.0880434	0.64925	0.0157945	0.846612	1.06858	1.26219	24.3289	24.5246	24.5876	24.447	24.7465	24.8267	24.2429	24.427	24.3987	24.4383	24.2711	24.2889	24.5547	24.557	24.3425	24.8197	24.9665	24.7679	2.10731e+07	2.41346e+07	2.52119e+07	2.28707e+07	2.81474e+07	2.97565e+07	1.98536e+07	2.25559e+07	2.21177e+07	2.27332e+07	2.02455e+07	2.04969e+07	2.46434e+07	2.46828e+07	2.12727e+07
Q13367	Immunoglobulin superfamily member 3	IGSF3	8	8	8	10.2	0	15.301	48	9.67077e-05	0.000717992	5.52463e-06	0.0383346	2.62456	4.83044	1.84048	NaN	NaN	20.4005	NaN	NaN	20.1797	21.6141	21.4118	20.8087	21.7964	21.4331	20.9212	22.6359	22.1243	21.9976	22.5404	22.0526	22.0243	NaN	NaN	1.38408e+06	NaN	NaN	1.18767e+06	3.20991e+06	2.78993e+06	1.83672e+06	3.64225e+06	2.83143e+06	1.98568e+06	6.51756e+06	4.5717e+06	4.18733e+06
O14617	Importin-4	IPO4	17	17	17	23.7	0	84.578	118	7.37834e-05	0.0118032	3.33321e-06	0.00124193	0.770982	0.541546	0.702411	23.2532	23.3396	23.1975	23.502	23.3193	23.4783	22.8363	23.0179	23.0158	22.9895	22.6389	23.2856	22.4251	22.2851	22.2353	22.9103	22.3727	22.4699	9.99794e+06	1.0615e+07	9.6193e+06	1.18797e+07	1.04667e+07	1.16862e+07	7.48878e+06	8.49334e+06	8.48098e+06	8.32778e+06	6.53112e+06	1.0225e+07	5.63155e+06	5.11074e+06	4.93733e+06
Q9Y2T2;P53677	Interferon regulatory factor 2-binding protein-like	IRF2BPL	4	4	4	8.4	0	15.347	33	0.00782884	0.318165	0.00180156	0.0356101	0.842763	0.609045	0.722677	20.6285	21.465	21.0994	21.0326	21.3446	20.9984	20.5481	20.5013	21.1377	20.6942	20.9606	21.2272	20.481	20.8488	20.0946	20.3565	20.2799	20.2368	1.62105e+06	2.89474e+06	2.24674e+06	2.14508e+06	2.66296e+06	2.09483e+06	1.53318e+06	1.48425e+06	2.30718e+06	1.69658e+06	2.04065e+06	2.45484e+06	1.46351e+06	1.88849e+06	1.11964e+06
P59780	Isochorismatase domain-containing protein 1	ISOC1	17	17	17	67.4	0	104.14	190	0.000272898	0.0354002	2.02278e-05	0.00369054	0.825836	0.631353	0.764502	26.0022	25.8522	25.811	25.971	25.764	25.9834	25.431	25.858	25.4862	25.6306	25.5512	25.7424	24.9912	25.1371	24.934	25.4442	25.4973	25.3208	6.72113e+07	6.05742e+07	5.88688e+07	6.57734e+07	5.69819e+07	6.63411e+07	4.5237e+07	6.08182e+07	4.70014e+07	5.19493e+07	4.91674e+07	5.61351e+07	3.33504e+07	3.68996e+07	3.2054e+07
P13798	Inositol-3-phosphate synthase 1	ISYNA1	15	15	15	37.5	0	65.573	153	0.000365694	0.432656	0.000539851	5.11527e-05	0.866408	1.6632	1.91965	23.9093	24.1514	24.5616	24.8388	24.5999	24.2388	23.9921	24.0807	24.415	24.3596	24.5213	23.7417	25.0437	25.1075	25.3041	24.9944	25.2172	25.2136	1.57549e+07	1.86336e+07	2.47616e+07	3.00071e+07	2.54277e+07	1.97973e+07	1.66856e+07	1.77424e+07	2.2369e+07	2.15263e+07	2.40795e+07	1.4027e+07	3.45864e+07	3.61502e+07	4.14279e+07
P27695	Integrin alpha-1	ITGA1	11	11	11	11.9	0	31.478	44	1.15693e-05	0.000887429	2.48709e-07	0.000482427	2.042	4.0111	1.9643	22.0231	21.7025	22.0314	21.9592	21.4179	22.2782	23.1435	23.2721	22.7074	22.1567	22.4556	23.5388	23.9712	24.0291	24.1576	23.6385	23.8338	23.9028	4.262e+06	3.41274e+06	4.28659e+06	4.07735e+06	2.80176e+06	5.08635e+06	9.2659e+06	1.01298e+07	6.84871e+06	4.67553e+06	5.75187e+06	1.21867e+07	1.64456e+07	1.71191e+07	1.87138e+07
Q9BZZ5	Integrin beta-1	ITGB1	19	19	19	33.8	0	151.03	229	3.20803e-05	0.000229096	1.10949e-06	0.0159292	1.38109	1.67361	1.2118	25.5363	25.7684	25.3223	25.3467	25.3589	25.5472	26.0571	25.8665	26.1524	25.8062	26.0254	25.7798	26.3448	26.3448	26.2505	26.0539	26.0827	26.2853	4.86623e+07	5.71559e+07	4.19539e+07	4.26694e+07	4.30318e+07	4.90313e+07	6.98182e+07	6.11776e+07	7.45859e+07	5.86733e+07	6.83008e+07	5.76094e+07	8.52266e+07	8.52266e+07	7.9834e+07
Q9HDC9	KDEL motif-containing protein 2	KDELC2	8	8	8	26	0	27.94	46	0.0120889	0.972062	0.00681081	0.0107272	1.0085	1.57866	1.56535	22.1211	22.4492	22.194	21.7635	21.3269	21.649	22.2582	21.9359	22.1252	21.9741	21.5205	21.947	22.8666	22.6771	22.6126	22.5148	22.8678	22.0578	4.56157e+06	5.72641e+06	4.79799e+06	3.56013e+06	2.63049e+06	3.2885e+06	5.01633e+06	4.01203e+06	4.57456e+06	4.11968e+06	3.00826e+06	4.04301e+06	7.64773e+06	6.70637e+06	6.41314e+06
Q8NCW5	KH domain-containing, RNA-binding, signal transduction-associated protein 1	KHDRBS1	9	9	9	26.6	0	40.808	122	0.000122093	0.00110606	7.05508e-06	0.0335628	1.38656	1.72174	1.24173	25.0431	24.7388	24.6473	24.2666	24.7536	24.8741	25.2557	25.1664	25.2085	25.1221	25.2863	25.2209	25.7881	25.2749	25.5082	25.3691	25.6371	25.5039	3.4572e+07	2.79976e+07	2.62771e+07	2.01825e+07	2.82863e+07	3.07504e+07	4.00611e+07	3.76566e+07	3.87717e+07	3.65179e+07	4.09199e+07	3.91064e+07	5.79418e+07	4.05979e+07	4.77236e+07
Q9BUR5	Kinesin-like protein KIF1A	KIF1A	9	9	6	8.6	0	27.833	55	1.54212e-06	5.65417e-06	2.11276e-08	0.0026925	0.536681	0.383379	0.714353	22.5994	22.1681	22.1175	22.5984	22.5149	22.2718	21.3575	21.6213	21.3385	21.5958	21.2627	21.7281	20.8001	20.6926	21.1891	21.0366	21.2392	21.0179	6.35473e+06	4.71263e+06	4.5502e+06	6.35033e+06	5.99322e+06	5.06384e+06	2.68688e+06	3.22597e+06	2.65173e+06	3.16945e+06	2.516e+06	3.47384e+06	1.8258e+06	1.6947e+06	2.39086e+06
Q9UKG1	Kinesin-1 heavy chain	KIF5B	42	42	31	51.4	0	323.31	402	0.000768104	7.74358e-05	0.0135413	0.0442047	0.719253	0.831558	1.15614	26.2503	26.2922	26.2419	26.2035	26.3549	26.1984	25.7408	25.7034	25.8214	25.6605	25.5348	26.1534	25.9923	26.0742	26.1203	25.8063	25.9124	26.0229	7.98229e+07	8.21752e+07	7.93595e+07	7.72751e+07	8.58253e+07	7.70024e+07	5.60729e+07	5.46379e+07	5.92947e+07	5.30372e+07	4.86117e+07	7.46376e+07	6.67516e+07	7.06507e+07	7.29447e+07
P07741	Kinesin light chain 2	KLC2	15	8	7	27.5	0	44.404	59	0.00216421	0.000884083	0.946579	0.00164781	0.673215	0.962744	1.43007	22.6853	22.5725	22.1017	22.3726	22.8302	22.8283	21.8902	22.0175	21.9691	21.8478	21.9925	22.3306	22.3834	22.5734	22.43	22.6807	22.4036	22.6916	6.74459e+06	6.23734e+06	4.50064e+06	5.4303e+06	7.45719e+06	7.44737e+06	3.88693e+06	4.24549e+06	4.10542e+06	3.77436e+06	4.17256e+06	5.27449e+06	5.4711e+06	6.24123e+06	5.65071e+06
O60306	Cytosol aminopeptidase	LAP3	19	19	19	54.1	0	100.85	197	1.46912e-05	0.00039441	3.55204e-07	0.00182337	0.760884	0.603261	0.792842	25.1843	24.9658	25.1348	25.2117	25.0789	25.0197	24.6984	24.6049	24.6141	24.6127	24.6961	24.9818	24.2132	24.3543	24.163	24.5306	24.3696	24.5605	3.81267e+07	3.27684e+07	3.68408e+07	3.88578e+07	3.54406e+07	3.40158e+07	2.72245e+07	2.5516e+07	2.56793e+07	2.56543e+07	2.71811e+07	3.31338e+07	1.94491e+07	2.14474e+07	1.8784e+07
P48444	Leucine--tRNA ligase, cytoplasmic	LARS	36	36	36	36.6	0	205.76	265	4.31626e-05	0.00538201	1.51457e-06	0.000973226	0.838525	0.676523	0.806802	25.5652	25.4033	25.4908	25.7535	25.6389	25.7075	25.4301	25.3635	25.1522	25.3113	25.4417	25.3476	24.8969	25.0101	25.0045	25.2362	24.9976	25.0394	4.96469e+07	4.43767e+07	4.71515e+07	5.65687e+07	5.2249e+07	5.47934e+07	4.52088e+07	4.31692e+07	3.72878e+07	4.16352e+07	4.55738e+07	4.26961e+07	3.12402e+07	3.37902e+07	3.36593e+07
P84077;P61204	Galectin-1	LGALS1	10	10	10	86.7	0	134.74	190	6.38434e-05	0.000285561	3.16837e-06	0.0489008	1.65509	2.16171	1.3061	26.5326	26.373	26.2181	25.9728	25.757	26.0329	26.9005	26.8023	26.6885	27.0396	27.1107	26.8002	27.651	27.1119	27.3458	26.8476	27.4168	27.1938	9.70752e+07	8.69089e+07	7.80611e+07	6.58555e+07	5.67061e+07	6.86568e+07	1.25273e+08	1.1703e+08	1.08153e+08	1.37953e+08	1.44922e+08	1.1686e+08	2.10756e+08	1.45042e+08	1.70571e+08
P18085	LIM domain and actin-binding protein 1	LIMA1	17	17	17	31.8	0	77.287	130	0.00179402	0.000650524	0.913579	0.00144196	0.769953	0.978936	1.27142	24.6022	24.5192	24.5736	24.3359	24.4019	24.2582	24.169	24.1321	24.1893	23.9113	23.9468	24.0889	24.6582	24.4074	24.5037	24.3847	24.3173	24.2288	2.54683e+07	2.40444e+07	2.49684e+07	2.11756e+07	2.21668e+07	2.00653e+07	1.88623e+07	1.83859e+07	1.91296e+07	1.57768e+07	1.61698e+07	1.78436e+07	2.64763e+07	2.22515e+07	2.37875e+07
P84085	Protein lin-7 homolog C	LIN7C	3	3	3	16.2	0	3.2922	17	0.0151672	0.996563	0.0101785	0.0119185	0.9811	0.414433	0.422417	22.4908	22.9864	22.3103	22.5671	22.2241	22.4638	22.6858	22.1961	22.0258	22.9847	22.2859	22.6053	22.044	NaN	22.1111	22.0375	NaN	NaN	5.89394e+06	8.3099e+06	5.20079e+06	6.21404e+06	4.89915e+06	5.78466e+06	6.74693e+06	4.80498e+06	4.26999e+06	8.30012e+06	5.11357e+06	6.38077e+06	4.32419e+06	NaN	4.53006e+06
P62330	Protein ERGIC-53	LMAN1	11	11	11	32.7	0	69.124	101	0.000384358	0.0047421	3.1788e-05	0.0460685	1.46839	1.93809	1.31988	23.4601	23.549	23.939	23.8203	23.7042	23.4896	23.9458	24.1568	24.5575	24.1279	24.1212	24.362	24.5391	24.669	24.4021	24.0911	24.9288	24.9455	1.15397e+07	1.22731e+07	1.60826e+07	1.48124e+07	1.36671e+07	1.17781e+07	1.61586e+07	1.87034e+07	2.46913e+07	1.83325e+07	1.82476e+07	2.15622e+07	2.43784e+07	2.66753e+07	2.21699e+07
Q8N6H7	Leucine-rich PPR motif-containing protein, mitochondrial	LRPPRC	80	80	80	65.8	0	323.31	935	2.53221e-06	3.47274e-08	0.000565788	4.32414e-05	1.53422	1.20857	0.787746	27.5664	27.4282	27.5379	27.4874	27.5282	27.5704	28.136	28.1853	28.2387	28.1429	28.1465	27.9647	27.8428	27.7279	27.5906	27.9639	27.7615	27.8488	1.98753e+08	1.80597e+08	1.94865e+08	1.88162e+08	1.93559e+08	1.99305e+08	2.94971e+08	3.05225e+08	3.16735e+08	2.96386e+08	2.97126e+08	2.61947e+08	2.40723e+08	2.22295e+08	2.02115e+08
P53367	Lanosterol synthase	LSS	17	17	17	29.9	0	26.419	137	0.0370903	0.0262138	0.990465	0.0338724	1.23004	1.01528	0.8254	23.7588	23.7426	23.6147	23.785	23.4546	23.8836	23.9885	24.1957	23.799	24.0771	23.9083	24.0678	23.7295	23.9329	23.3958	24.005	23.6983	23.5586	1.41942e+07	1.40357e+07	1.2845e+07	1.44543e+07	1.14958e+07	1.54768e+07	1.6644e+07	1.92146e+07	1.45953e+07	1.76982e+07	1.5744e+07	1.75845e+07	1.39089e+07	1.60148e+07	1.10367e+07
Q07960	Protein mab-21-like 1;Protein mab-21-like 2	MAB21L1;MAB21L2	4	4	4	11.7	0	7.7268	58	2.28575e-05	0.000172995	7.30647e-07	0.0121331	1.54136	2	1.29756	21.4274	21.4775	21.8864	21.501	21.1328	21.1876	22.109	22.2498	21.7515	22.2394	22.1552	21.917	22.5372	22.3755	22.5811	22.4064	22.3445	22.482	2.82027e+06	2.91993e+06	3.87671e+06	2.96788e+06	2.29936e+06	2.38838e+06	4.52347e+06	4.9872e+06	3.53064e+06	4.95138e+06	4.67068e+06	3.95981e+06	6.08658e+06	5.44122e+06	6.27463e+06
Q68EM7	Protein MAK16 homolog	MAK16	4	4	4	15	0	21.772	26	0.013516	0.00432277	0.55801	0.0347533	2.79198	1.39892	0.501048	NaN	NaN	NaN	NaN	NaN	NaN	20.9971	21.2482	20.4713	21.5849	20.9902	NaN	20.4994	NaN	NaN	NaN	NaN	20.7064	NaN	NaN	NaN	NaN	NaN	NaN	2.09294e+06	2.49084e+06	1.4537e+06	3.14559e+06	2.08295e+06	NaN	1.48229e+06	NaN	NaN
Q6ZRI8	Mesencephalic astrocyte-derived neurotrophic factor	MANF	11	11	11	39.6	0	56.903	114	1.90102e-06	1.06776e-05	2.69216e-08	0.00186112	1.70811	2.35403	1.37815	23.611	23.4969	24.0095	23.935	23.6465	23.933	24.5285	24.6017	24.7765	24.5894	24.5999	24.1843	25.1507	24.8272	24.8463	25.1327	24.959	25.163	1.28121e+07	1.18378e+07	1.68881e+07	1.60381e+07	1.31312e+07	1.60159e+07	2.41999e+07	2.54595e+07	2.87389e+07	2.52433e+07	2.54277e+07	1.90634e+07	3.7249e+07	2.97668e+07	3.01635e+07
P52565	Microtubule-associated protein 1B;MAP1B heavy chain;MAP1 light chain LC1	MAP1B	94	94	91	49.4	0	323.31	1072	4.53197e-06	0.113367	1.40927e-07	3.02891e-06	1.07144	1.37554	1.28383	27.4585	27.5075	27.5644	27.5098	27.4711	27.4065	27.6733	27.577	27.4309	27.6418	27.6091	27.5759	27.8137	27.8538	28.0689	27.9759	27.9905	27.9647	1.8443e+08	1.90802e+08	1.98477e+08	1.91106e+08	1.86048e+08	1.77901e+08	2.14039e+08	2.00218e+08	1.80935e+08	2.09417e+08	2.04723e+08	2.00066e+08	2.35916e+08	2.42566e+08	2.81566e+08
Q92888	Mitogen-activated protein kinase 8	MAPK8	3	3	2	9.8	0	7.1346	16	0.0416598	0.971973	0.0275468	0.0427217	0.997991	0.746127	0.747628	19.6326	19.7529	19.7448	19.4208	19.6695	19.8487	NaN	19.5805	NaN	NaN	19.4272	NaN	19.3167	19.3644	NaN	19.4501	19.3787	NaN	812833	883518	878571	701848	833891	944178	NaN	784003	NaN	NaN	704969	NaN	652989	674940	NaN
Q92974	Methyl-CpG-binding domain protein 3	MBD3	3	3	3	13.7	0	9.8345	14	0.0307102	0.0626925	0.697494	0.0128071	0.63708	1.18027	1.85262	NaN	NaN	NaN	NaN	NaN	19.8436	NaN	NaN	NaN	NaN	19.6379	NaN	NaN	19.9237	20.0305	19.4632	20.5003	20.034	NaN	NaN	NaN	NaN	NaN	940847	NaN	NaN	NaN	NaN	815825	NaN	NaN	994561	1.07098e+06
Q14155;Q15052	Malate dehydrogenase, mitochondrial	MDH2	26	26	26	69.2	0	214.21	644	6.52204e-05	2.81242e-06	0.0135057	0.000877314	1.50155	1.18702	0.790534	28.0684	28.1097	28.3302	28.2609	28.3083	28.2665	28.7097	28.735	28.9175	28.7823	28.7791	28.9429	28.5948	28.6298	28.2553	28.4552	28.5938	28.2707	2.81469e+08	2.89643e+08	3.37474e+08	3.21646e+08	3.3239e+08	3.22897e+08	4.39017e+08	4.46783e+08	5.07031e+08	4.61674e+08	4.60651e+08	5.16037e+08	4.05408e+08	4.15364e+08	3.204e+08
O14497	72 kDa type IV collagenase;PEX	MMP2	3	3	3	7.7	0	6.351	21	0.0231442	0.0371839	0.795665	0.0103585	1.61495	0.936998	0.580203	20.3447	NaN	19.6698	NaN	20.2724	20.1875	21.0351	21.1707	20.4951	20.3221	20.8378	20.9679	20.2298	20.3066	NaN	20.7864	NaN	NaN	1.33157e+06	NaN	834065	NaN	1.26649e+06	1.19411e+06	2.1488e+06	2.36056e+06	1.47788e+06	1.31088e+06	1.87414e+06	2.05101e+06	1.22964e+06	1.29687e+06	NaN
Q68CP9	MOB-like protein phocein	MOB4	5	5	5	40	0	15.761	56	0.0274391	0.0272645	0.971822	0.0174164	0.719091	1.01703	1.41433	22.6343	22.633	22.3932	22.165	22.4564	21.7589	21.9242	22.1973	22.0493	21.7628	21.7245	21.6273	22.3748	22.6197	22.66	22.1677	22.4343	21.9999	6.51033e+06	6.50447e+06	5.50839e+06	4.70251e+06	5.75506e+06	3.5488e+06	3.97962e+06	4.80898e+06	4.34011e+06	3.55841e+06	3.46518e+06	3.23941e+06	5.43859e+06	6.44478e+06	6.62735e+06
Q9Y4X5	MAGUK p55 subfamily member 6	MPP6	10	10	10	23	0	31.95	36	0.000126065	0.00157129	0.0236918	7.0454e-06	1.53997	0.74673	0.484899	22.3797	21.9179	22.6179	22.3504	22.1421	22.189	22.8894	22.6279	22.7816	22.9191	22.8847	23.2545	22.2896	21.5838	21.8019	22.0342	21.8231	21.4818	5.45709e+06	3.96228e+06	6.43675e+06	5.34738e+06	4.62846e+06	4.78139e+06	7.76955e+06	6.48152e+06	7.21016e+06	7.93116e+06	7.74428e+06	1.0007e+07	5.1267e+06	3.14319e+06	3.65617e+06
P40616	C-type mannose receptor 2	MRC2	18	18	18	21.6	0	47.719	122	0.000130125	0.00272798	7.11659e-06	0.01386	2.62412	5.25291	2.00178	20.7315	22.7273	21.6139	21.9686	22.2567	22.0334	23.587	23.9324	23.5373	23.4519	23.308	21.8393	24.2293	24.428	24.4733	24.6054	24.575	24.0072	1.74102e+06	6.94383e+06	3.20946e+06	4.104e+06	5.01111e+06	4.29254e+06	1.26007e+07	1.60092e+07	1.2174e+07	1.14743e+07	1.0385e+07	3.75219e+06	1.96674e+07	2.25715e+07	2.32915e+07
P36404	39S ribosomal protein L15, mitochondrial	MRPL15	6	6	6	26	0	15.795	27	0.0042571	0.511568	0.0101834	0.00107155	1.10205	0.759967	0.689595	21.1696	21.4345	21.2495	21.4325	21.5963	21.5215	21.5942	21.4308	21.6807	21.2552	21.3878	21.8575	20.7301	20.9973	21.0213	21.3696	20.7884	21.0742	2.35876e+06	2.83418e+06	2.49308e+06	2.83025e+06	3.17055e+06	3.01035e+06	3.16593e+06	2.82692e+06	3.36156e+06	2.50295e+06	2.74391e+06	3.79982e+06	1.73933e+06	2.09323e+06	2.12834e+06
P36405	39S ribosomal protein L39, mitochondrial	MRPL39	7	7	7	31.7	0	17.273	48	0.0212142	0.00819614	0.67443	0.0442591	1.3362	1.08069	0.808777	21.8712	21.8688	22.1871	22.3907	22.1304	21.8908	22.3654	22.6041	22.3684	22.5109	22.6137	22.446	22.2563	21.9542	21.7608	22.5042	22.121	22.3684	3.83608e+06	3.8297e+06	4.7751e+06	5.49886e+06	4.59107e+06	3.88855e+06	5.40326e+06	6.37547e+06	5.41451e+06	5.97663e+06	6.41803e+06	5.71372e+06	5.00973e+06	4.06324e+06	3.55348e+06
Q15041	Bifunctional methylenetetrahydrofolate dehydrogenase/cyclohydrolase, mitochondrial;NAD-dependent methylenetetrahydrofolate dehydrogenase;Methenyltetrahydrofolate cyclohydrolase	MTHFD2	2	2	2	6.6	0	5.554	28	0.00193081	0.0671131	0.000268478	0.0328401	0.630224	0.283318	0.449552	21.7922	21.6157	21.585	21.9729	21.756	21.226	NaN	21.2938	20.9238	NaN	21.7482	21.4781	NaN	20.3775	NaN	NaN	20.1225	NaN	3.63167e+06	3.21347e+06	3.14581e+06	4.11625e+06	3.54167e+06	2.4528e+06	NaN	2.57083e+06	1.98926e+06	NaN	3.52258e+06	2.92114e+06	NaN	1.36219e+06	NaN
O75915	Myosin light polypeptide 6	MYL6	9	9	7	58.9	0	57.172	105	0.00845759	0.0183369	0.590015	0.00250188	0.746486	1.11964	1.49988	24.5728	24.7907	24.6804	24.5945	24.4228	24.8279	24.4586	24.0852	23.9432	24.1458	24.2935	24.4033	24.8259	24.7839	25.383	24.4199	24.6956	24.5999	2.49546e+07	2.90231e+07	2.68869e+07	2.53327e+07	2.24903e+07	2.97812e+07	2.30554e+07	1.77979e+07	1.61295e+07	1.85614e+07	2.05623e+07	2.21884e+07	2.974e+07	2.88867e+07	4.37567e+07
Q96BM9	Alpha-N-acetylgalactosaminidase	NAGA	4	4	4	12.2	0	5.7853	16	0.00058151	0.0089298	5.50992e-05	0.0458011	1.65369	2.43389	1.47179	NaN	NaN	NaN	NaN	NaN	NaN	NaN	20.3826	20.1272	20.213	NaN	NaN	20.7293	20.5929	20.6166	20.4088	20.485	NaN	NaN	NaN	NaN	NaN	NaN	NaN	NaN	1.36702e+06	1.14523e+06	1.2154e+06	NaN	NaN	1.73837e+06	1.58154e+06	1.60774e+06
Q9NVJ2	Nucleosome assembly protein 1-like 4	NAP1L4	20	20	18	58.9	0	180.11	216	0.00123893	0.000149722	0.0488036	0.0249117	0.730354	0.864885	1.1842	25.5271	25.655	25.6417	25.4525	25.4253	25.4332	25.0519	25.0017	25.3055	25.1546	24.854	25.0254	25.3419	25.2042	25.5955	25.3567	25.1563	25.1952	4.83529e+07	5.28353e+07	5.23505e+07	4.59162e+07	4.50586e+07	4.5306e+07	3.47835e+07	3.3594e+07	4.14681e+07	3.73499e+07	3.03249e+07	3.41504e+07	4.25277e+07	3.86563e+07	5.07006e+07
Q9NVT9	Neural cell adhesion molecule 1	NCAM1	26	26	26	40	0	302.07	295	4.191e-09	9.5283e-11	1.37401e-12	0.000143742	2.41777	3.20926	1.32736	24.7501	24.6103	24.6952	24.6264	24.5571	24.8848	26.2288	25.8992	26.0849	25.8895	25.9522	25.6742	26.415	26.3831	26.3319	26.3639	26.3939	26.3525	2.82178e+07	2.56117e+07	2.71641e+07	2.58991e+07	2.46845e+07	3.09793e+07	7.86422e+07	6.25801e+07	7.11766e+07	6.21607e+07	6.49218e+07	5.35432e+07	8.94762e+07	8.75194e+07	8.44679e+07
Q8IUR7	Neural cell adhesion molecule 2	NCAM2	8	8	8	15.9	0	22.185	40	3.6643e-05	0.802585	1.18425e-05	4.22453e-06	0.949239	7.12748	7.50863	NaN	NaN	NaN	NaN	NaN	NaN	NaN	NaN	NaN	NaN	21.2039	NaN	22.145	23.0931	23.071	22.3896	22.6166	22.9855	NaN	NaN	NaN	NaN	NaN	NaN	NaN	NaN	NaN	NaN	2.41552e+06	NaN	4.63777e+06	8.94779e+06	8.81177e+06
Q9UH62	Nuclear receptor coactivator 7	NCOA7	4	4	4	8.7	0	8.6752	12	0.0236138	0.999433	0.0188335	0.0176759	0.904374	1.82872	2.02208	NaN	NaN	NaN	NaN	NaN	NaN	19.8576	NaN	NaN	NaN	NaN	NaN	20.0332	20.0735	20.631	20.7078	20.3505	20.4958	NaN	NaN	NaN	NaN	NaN	NaN	950021	NaN	NaN	NaN	NaN	NaN	1.07299e+06	1.10338e+06	1.62386e+06
Q92747	NADH dehydrogenase [ubiquinone] 1 alpha subcomplex subunit 11	NDUFA11	6	6	6	58.2	0	12.947	48	0.0134051	0.00426684	0.557521	0.0343744	1.40339	1.0928	0.778687	21.8656	21.6507	22.1945	22.1254	22.3998	22.0406	22.3835	22.6621	22.5653	22.8338	22.2568	22.554	22.2284	21.9756	22.0895	22.4779	22.3323	21.9873	3.82121e+06	3.29238e+06	4.79966e+06	4.57519e+06	5.53365e+06	4.31402e+06	5.47148e+06	6.637e+06	6.20629e+06	7.47582e+06	5.01146e+06	6.15787e+06	4.91377e+06	4.12396e+06	4.46275e+06
O15143	Nestin	NES	63	63	63	46.1	0	323.31	797	3.92287e-05	0.000338624	1.45931e-06	0.0152575	1.49194	1.88441	1.26306	26.9906	26.9583	27.3603	27.1579	27.2039	27.037	27.8122	27.9017	27.5419	27.8279	27.8159	27.1953	28.0372	27.8593	27.9387	28.1402	28.0855	28.1497	1.33346e+08	1.30394e+08	1.72294e+08	1.49742e+08	1.54593e+08	1.37704e+08	2.35671e+08	2.50754e+08	1.95406e+08	2.3825e+08	2.36276e+08	1.53674e+08	2.75447e+08	2.43492e+08	2.57269e+08
O15144	Nitrilase homolog 1	NIT1	4	4	4	14.7	0	9.3514	37	0.022741	0.753281	0.00960482	0.0399353	1.08916	1.46565	1.34566	20.4878	21.1552	20.3829	21.143	20.5756	20.5129	20.8456	20.5709	20.5687	20.7458	20.7726	21.488	21.2507	21.1674	21.4632	21.4298	21.0938	21.3401	1.47042e+06	2.33534e+06	1.3673e+06	2.31567e+06	1.56269e+06	1.49623e+06	1.8843e+06	1.55761e+06	1.55523e+06	1.75836e+06	1.79133e+06	2.94125e+06	2.49516e+06	2.35517e+06	2.89113e+06
O15145	Neurolysin, mitochondrial	NLN	6	6	6	12.8	0	10.046	44	0.0364798	0.783348	0.0619287	0.0169445	1.04398	0.860773	0.824512	22.17	22.1325	21.8945	22.2254	22.1	22.1073	22.2964	22.2158	22.0945	22.2178	22.2314	21.94	21.6515	21.692	21.7374	21.9757	22.0679	22.1505	4.71884e+06	4.59776e+06	3.89853e+06	4.90357e+06	4.49534e+06	4.51815e+06	5.15092e+06	4.87105e+06	4.47824e+06	4.8778e+06	4.924e+06	4.02345e+06	3.29421e+06	3.38799e+06	3.49631e+06
P59998	Nucleoside diphosphate kinase 3	NME3	2	2	2	20.1	0	6.8511	29	2.14274e-06	2.39603e-05	2.88633e-08	0.000811397	2.1058	3.58523	1.70255	20.0417	NaN	19.8353	NaN	NaN	NaN	21.2169	20.8693	20.8453	21.1534	20.9164	20.4628	21.9687	21.3881	21.6016	21.7188	21.4196	21.9784	1.07933e+06	NaN	935449	NaN	NaN	NaN	2.43738e+06	1.91551e+06	1.88391e+06	2.33243e+06	1.97908e+06	1.44516e+06	4.10429e+06	2.74448e+06	3.18222e+06
O15511	Nucleolar complex protein 2 homolog	NOC2L	9	9	9	14.3	0	56.356	65	0.000376715	3.40745e-05	0.0950994	0.00234353	1.84404	1.23673	0.670665	22.6704	22.8154	22.4358	22.6354	22.9246	22.7344	23.6003	23.7453	23.355	23.8784	23.7768	23.0433	23.0001	23.0881	22.6762	23.0271	22.9734	23.274	6.67529e+06	7.38108e+06	5.67347e+06	6.5153e+06	7.96145e+06	6.97809e+06	1.27174e+07	1.4062e+07	1.07289e+07	1.54211e+07	1.43724e+07	8.64419e+06	8.38919e+06	8.91683e+06	6.70218e+06
Q9BPX5	Nucleolar protein 11	NOL11	9	9	9	19.7	0	20.729	31	0.043375	0.212607	0.350745	0.0154147	1.33416	0.833018	0.624378	21.8328	22.3464	21.8834	21.6786	22.2191	22.086	22.2156	22.7294	22.4342	22.4885	22.786	21.7726	21.453	21.4902	21.108	22.467	22.1017	21.5036	3.73532e+06	5.33257e+06	3.86865e+06	3.35667e+06	4.8822e+06	4.45193e+06	4.87037e+06	6.95394e+06	5.66718e+06	5.88455e+06	7.23218e+06	3.58266e+06	2.87076e+06	2.94574e+06	2.26017e+06
P15289	Nucleolar protein 6	NOL6	9	9	9	13.9	0	24.788	68	0.00036119	0.154323	0.00142557	3.58536e-05	1.21974	0.664037	0.54441	22.3724	22.2468	22.54	22.5551	22.4436	22.4688	22.7505	22.537	22.5758	23.0036	22.7726	22.6795	21.9602	21.8869	21.3242	22.4232	21.5553	21.6991	5.42955e+06	4.97684e+06	6.0984e+06	6.16257e+06	5.70423e+06	5.80474e+06	7.0564e+06	6.08573e+06	6.25163e+06	8.40957e+06	7.16532e+06	6.71753e+06	4.08018e+06	3.87805e+06	2.62557e+06
P15848	Epididymal secretory protein E1	NPC2	5	5	5	38.4	0	68.846	59	0.000413144	0.0322875	3.38194e-05	0.00738285	1.52267	2.59559	1.70463	22.508	21.9401	22.5532	22.0856	22.4343	22.4377	23.2924	23.1996	23.0384	22.7877	22.8429	22.3516	23.8826	23.737	23.9085	22.7286	23.8091	23.9376	5.96462e+06	4.02372e+06	6.15446e+06	4.4507e+06	5.66757e+06	5.68095e+06	1.02733e+07	9.63331e+06	8.61488e+06	7.24071e+06	7.52312e+06	5.35183e+06	1.5466e+07	1.39813e+07	1.57462e+07
O00192	Puromycin-sensitive aminopeptidase	NPEPPS	36	36	36	52.3	0	160.26	383	0.0027796	0.129397	0.0277856	0.000458989	0.929086	1.10777	1.19233	25.7063	25.6684	25.8668	25.8739	25.888	25.7747	25.6297	25.7143	25.5338	25.7692	25.7446	25.7509	25.8259	26.0158	25.9076	25.9299	25.9403	26.0489	5.47479e+07	5.33284e+07	6.11903e+07	6.14922e+07	6.20961e+07	5.74061e+07	5.19169e+07	5.50523e+07	4.8578e+07	5.71876e+07	5.62208e+07	5.64668e+07	5.94799e+07	6.78479e+07	6.29455e+07
Q9HBK9	Neuronal cell adhesion molecule	NRCAM	25	25	25	30.3	0	133.94	354	6.21332e-08	3.1134e-10	4.99729e-09	0.0358197	2.15349	1.8846	0.875135	25.3188	25.2894	25.0765	25.2173	24.9886	25.1039	26.3606	26.2221	26.2969	26.3282	26.3018	26.1434	26.151	26.0704	25.902	26.3321	25.9877	26.0265	4.18522e+07	4.10079e+07	3.53817e+07	3.90089e+07	3.32903e+07	3.60601e+07	8.61651e+07	7.82778e+07	8.24434e+07	8.42516e+07	8.27239e+07	7.41221e+07	7.45136e+07	7.04648e+07	6.27016e+07
Q13510	Nuclear mitotic apparatus protein 1	NUMA1	86	86	86	51.9	0	323.31	920	1.25352e-06	7.21334e-07	2.19804e-08	0.0423555	1.45095	1.62666	1.1211	27.0415	27.2221	27.0318	27.0195	26.8565	26.7975	27.4982	27.5432	27.4611	27.4855	27.6676	27.5651	27.767	27.5958	27.6782	27.6534	27.7165	27.7993	1.38135e+08	1.56556e+08	1.37209e+08	1.36044e+08	1.2151e+08	1.16641e+08	1.89576e+08	1.95582e+08	1.84763e+08	1.87914e+08	2.13195e+08	1.98574e+08	2.28402e+08	2.02845e+08	2.14767e+08
Q9ULH1	Oxysterol-binding protein-related protein 8	OSBPL8	12	12	12	20.9	0	52.3	86	7.29882e-05	0.00805939	3.173e-06	0.00170126	1.27407	1.71884	1.3491	22.1964	22.2638	21.9849	22.2889	21.9487	21.9511	22.4845	22.23	22.4314	22.3526	22.6442	22.5925	22.8041	22.9873	23.1632	22.8731	22.5664	22.9061	4.80598e+06	5.03584e+06	4.15063e+06	5.12422e+06	4.04778e+06	4.05452e+06	5.86825e+06	4.91923e+06	5.65619e+06	5.35554e+06	6.55516e+06	6.32441e+06	7.32349e+06	8.31509e+06	9.3933e+06
O43150	Protein kinase C and casein kinase substrate in neurons protein 3	PACSIN3	3	3	3	10.8	0	6.0064	24	0.000828029	0.869358	0.000233835	0.000615221	1.28167	3.86882	3.01858	NaN	NaN	NaN	NaN	NaN	NaN	20.0891	NaN	20.4779	20.7272	NaN	NaN	22.03	21.595	21.1799	21.4996	21.4913	20.9288	NaN	NaN	NaN	NaN	NaN	NaN	1.11538e+06	NaN	1.46037e+06	1.73584e+06	NaN	NaN	4.28244e+06	3.16769e+06	2.37567e+06
Q9UBL3	Pyruvate carboxylase, mitochondrial	PC	17	17	17	23.5	0	63.134	118	0.00451033	0.0933847	0.0687168	0.000805064	1.14293	0.861174	0.753477	23.7302	23.488	23.3917	23.8588	23.8026	23.6698	23.8052	23.8641	23.8376	23.7794	23.838	24.0174	23.4651	23.6923	23.2842	23.5955	23.2653	23.3484	1.39156e+07	1.1765e+07	1.10053e+07	1.5213e+07	1.46318e+07	1.3345e+07	1.46582e+07	1.5269e+07	1.49911e+07	1.43983e+07	1.49952e+07	1.69808e+07	1.15797e+07	1.35548e+07	1.02151e+07
P04424	PCI domain-containing protein 2	PCID2	4	4	4	14.8	0	11.93	12	0.0231306	0.0607862	0.57728	0.00832102	2.04956	0.606432	0.295884	NaN	NaN	NaN	NaN	NaN	21.1862	21.3307	21.7557	21.1735	21.2443	NaN	NaN	NaN	NaN	NaN	NaN	NaN	NaN	NaN	NaN	NaN	NaN	NaN	2.38606e+06	2.63743e+06	3.54094e+06	2.36515e+06	2.48411e+06	NaN	NaN	NaN	NaN	NaN
O95671	Procollagen C-endopeptidase enhancer 1	PCOLCE	18	18	18	49.4	0	45.053	145	0.000817879	0.0169985	8.29496e-05	0.0381913	1.27439	1.55828	1.22277	23.7878	23.7094	23.768	23.8807	24.0285	24.003	23.9534	24.2442	23.9631	24.3803	24.5237	24.1512	24.5237	24.6904	24.324	24.6016	24.213	24.6339	1.44824e+07	1.37164e+07	1.4285e+07	1.54457e+07	1.71119e+07	1.68121e+07	1.6244e+07	1.98715e+07	1.63535e+07	2.18374e+07	2.41196e+07	1.8631e+07	2.41196e+07	2.70739e+07	2.10017e+07
O43681	Programmed cell death 6-interacting protein	PDCD6IP	32	32	32	50.1	0	225.16	285	0.013185	0.0135225	0.937601	0.00681648	0.84096	1.02335	1.21688	25.0089	24.9011	24.983	25.0347	24.8321	24.8853	24.6428	24.5189	24.5572	24.8694	24.7369	24.7985	24.7863	24.9875	24.8349	25.0249	24.9095	25.2615	3.37621e+07	3.13313e+07	3.31614e+07	3.43713e+07	2.98681e+07	3.099e+07	2.61952e+07	2.40394e+07	2.46862e+07	3.06503e+07	2.79608e+07	2.91805e+07	2.89348e+07	3.3265e+07	2.99261e+07
P08243	2,5-phosphodiesterase 12	PDE12	11	11	11	33.3	0	51.144	155	0.00167379	0.237804	0.000267245	0.00754247	0.886932	0.701749	0.79121	22.9533	23.0751	23.0455	23.2597	23.4815	23.2787	23.0552	23.0982	22.9483	22.9946	22.87	23.1377	22.7141	22.6177	22.3671	22.8816	22.5832	22.8663	8.12142e+06	8.83685e+06	8.65739e+06	1.00431e+07	1.17121e+07	1.01762e+07	8.71579e+06	8.97948e+06	8.09332e+06	8.35727e+06	7.66577e+06	9.22873e+06	6.88059e+06	6.43585e+06	5.40964e+06
Q9BZE9	Protein disulfide-isomerase A4	PDIA4	50	50	50	64.5	0	323.31	833	9.43182e-08	3.26412e-08	4.64797e-10	0.00313225	1.87711	2.34228	1.24781	27.5162	27.2212	27.4728	27.3764	27.3078	27.3822	28.2068	28.3635	28.4366	28.3042	28.4174	27.9678	28.739	28.6641	28.4044	28.5236	28.7225	28.5821	1.91956e+08	1.56458e+08	1.86267e+08	1.74228e+08	1.66137e+08	1.7493e+08	3.09808e+08	3.45354e+08	3.63303e+08	3.31446e+08	3.58501e+08	2.62511e+08	4.48024e+08	4.25357e+08	3.55285e+08
Q9NVM9	PDZ and LIM domain protein 4	PDLIM4	3	3	3	13	0	4.9577	23	3.04211e-05	0.000568837	9.45353e-07	0.00493596	0.523239	0.307375	0.587447	22.1552	21.9875	21.8858	21.6834	22.1532	21.1798	21.1837	20.4781	20.4961	21.0563	21.4628	20.6975	20.0955	20.0364	19.8712	20.4239	20.3592	20.1915	4.67068e+06	4.15812e+06	3.87509e+06	3.36786e+06	4.66421e+06	2.3755e+06	2.38193e+06	1.46057e+06	1.47891e+06	2.18061e+06	2.89032e+06	1.70047e+06	1.12034e+06	1.07537e+06	959019
Q8NBU5	PDZ and LIM domain protein 5	PDLIM5	12	12	12	26.7	0	44.633	71	0.00256659	0.000482606	0.280222	0.0112627	0.629077	0.853505	1.35676	23.5966	23.4026	23.3246	23.5205	23.7126	23.0146	22.8811	22.7271	23.0261	22.42	22.3812	23.0737	23.2058	23.4098	23.245	23.0869	23.2952	23.0241	1.26848e+07	1.10888e+07	1.05052e+07	1.20331e+07	1.37469e+07	8.47393e+06	7.72498e+06	6.94287e+06	8.54175e+06	5.61167e+06	5.46277e+06	8.82827e+06	9.6748e+06	1.11443e+07	9.94128e+06
Q6PL18	Xaa-Pro dipeptidase	PEPD	17	17	17	40.4	0	121.28	181	0.0274417	0.106581	0.428631	0.00919125	0.863328	1.09246	1.2654	25.0102	24.6665	24.9888	24.8465	24.9167	25.1168	24.6637	24.7383	24.6964	24.8424	24.8967	24.4322	24.9642	24.7934	25.0975	25.1332	25.3383	24.9652	3.37925e+07	2.66291e+07	3.32949e+07	3.01677e+07	3.16719e+07	3.6384e+07	2.65775e+07	2.79879e+07	2.71867e+07	3.00821e+07	3.12359e+07	2.26373e+07	3.2732e+07	2.90775e+07	3.59005e+07
Q9NVI7;Q5T2N8	ATP-dependent 6-phosphofructokinase, liver type	PFKL	18	15	15	38.7	0	64.165	127	0.0361159	0.717142	0.0710255	0.0156399	0.946017	1.181	1.24839	23.8643	23.4841	23.6353	23.9249	23.6834	23.5249	23.7018	23.5835	23.6381	23.7979	23.6113	23.3147	23.8001	23.9752	23.7299	24.2327	23.9569	23.8619	1.52711e+07	1.17333e+07	1.30297e+07	1.59262e+07	1.34714e+07	1.20698e+07	1.36443e+07	1.25702e+07	1.3055e+07	1.45842e+07	1.28147e+07	1.04334e+07	1.46064e+07	1.64913e+07	1.39127e+07
Q5T9A4	ATP-dependent 6-phosphofructokinase, platelet type	PFKP	28	28	25	41.5	0	101.96	258	0.000273429	0.999366	9.68706e-05	9.10772e-05	0.995693	1.3219	1.32761	25.0721	24.7035	25.036	25.0261	25.0617	24.9899	24.907	25.0325	24.8918	24.9965	24.9721	25.0753	25.2931	25.3327	25.2946	25.2687	25.5859	25.5288	3.5274e+07	2.73209e+07	3.44023e+07	3.4167e+07	3.50206e+07	3.33203e+07	3.14597e+07	3.43189e+07	3.113e+07	3.34731e+07	3.29118e+07	3.53523e+07	4.11132e+07	4.22574e+07	4.1156e+07
Q9NT62	6-phosphogluconate dehydrogenase, decarboxylating	PGD	24	24	24	65	0	150.12	281	0.00250638	0.000452933	0.243809	0.0126978	0.782399	0.924731	1.18192	26.7946	26.8248	26.7862	26.702	26.5759	26.8028	26.453	26.4597	26.3732	26.4691	26.3192	26.2927	26.5676	26.6584	26.6794	26.3856	26.9147	26.5648	1.16407e+08	1.18869e+08	1.15731e+08	1.0917e+08	1.00033e+08	1.1707e+08	9.18642e+07	9.22919e+07	8.69209e+07	9.28952e+07	8.37276e+07	8.22037e+07	9.94591e+07	1.0592e+08	1.07473e+08
Q9Y4P1	Phosphoglycerate kinase 1	PGK1	37	37	31	84.2	0	323.31	740	0.00981367	0.00383988	0.804147	0.0136499	0.698487	0.953631	1.36528	28.4119	28.5126	28.7561	28.6409	28.613	28.6649	27.8726	27.9609	28.2274	27.7764	28.0165	28.529	28.4928	28.6107	28.2929	28.0963	28.8795	28.7042	3.57136e+08	3.82955e+08	4.53366e+08	4.18572e+08	4.10555e+08	4.25593e+08	2.45747e+08	2.61258e+08	3.14264e+08	2.29895e+08	2.71523e+08	3.87333e+08	3.77735e+08	4.09901e+08	3.2886e+08
P31939	Phosphoglucomutase-1	PGM1	27	27	27	55.9	0	204.75	251	0.000339321	0.944772	0.000164603	9.11551e-05	0.987784	1.53214	1.55109	25.3298	25.319	25.3539	25.2187	25.297	25.1996	25.2412	25.5539	25.2978	25.458	25.1323	24.823	25.7475	26.2017	26.0024	25.777	25.6832	25.9398	4.21725e+07	4.1858e+07	4.28829e+07	3.90468e+07	4.12245e+07	3.85332e+07	3.96605e+07	4.92595e+07	4.12474e+07	4.60916e+07	3.6777e+07	2.96803e+07	5.63339e+07	7.71787e+07	6.72206e+07
Q8WXF7	Paired mesoderm homeobox protein 2A	PHOX2A	8	8	5	43.3	0	27.955	127	0.049678	0.75074	0.092496	0.0233387	0.924426	1.31697	1.42463	24.3177	23.8062	24.3649	23.9022	23.8122	23.9952	24.0029	23.7019	24.2604	24.0976	24.0449	23.34	24.8692	24.2689	24.5949	24.4588	24.3727	23.9667	2.09101e+07	1.46683e+07	2.16056e+07	1.56776e+07	1.47294e+07	1.67215e+07	1.6811e+07	1.36453e+07	2.00959e+07	1.79515e+07	1.73076e+07	1.06179e+07	3.06461e+07	2.02147e+07	2.53398e+07
Q8NHH9	Paired mesoderm homeobox protein 2B	PHOX2B	5	2	2	21	0	6.293	27	0.0116984	0.750338	0.00437941	0.0187908	0.939742	0.719453	0.765586	21.0031	21.0309	20.7301	21.1727	21.1307	21.1099	21.2035	20.7769	20.9049	21.1279	20.6966	20.9046	NaN	20.2798	20.7607	20.6058	20.2698	20.9725	2.10166e+06	2.14255e+06	1.73933e+06	2.36384e+06	2.29601e+06	2.26315e+06	2.41485e+06	1.79668e+06	1.96337e+06	2.29156e+06	1.69941e+06	1.96296e+06	NaN	1.273e+06	1.77662e+06
Q6DD88	Plectin	PLEC	114	114	112	32.8	0	282.94	737	6.06421e-05	5.07348e-06	0.379578	5.10736e-05	1.40269	1.06225	0.757296	26.0619	26.3777	26.3207	26.2406	26.3784	26.0799	26.7065	26.7027	26.7049	26.6348	26.8589	26.804	26.3117	26.2649	26.2114	26.4695	26.2805	26.4589	7.00509e+07	8.71925e+07	8.38147e+07	7.9288e+07	8.72348e+07	7.09304e+07	1.09511e+08	1.09223e+08	1.0939e+08	1.04201e+08	1.21712e+08	1.17168e+08	8.32935e+07	8.06348e+07	7.76994e+07
Q9P241	Pleckstrin homology domain-containing family A member 6	PLEKHA6	9	9	9	11	0	15.212	27	6.83208e-05	0.00332902	2.85687e-06	0.00358227	2.047	4.42754	2.16294	NaN	20.866	21.2384	NaN	21.0554	21.1197	22.0424	22.0792	21.1914	21.7048	21.6221	21.9961	22.9383	23.1722	23.2	22.1951	22.6764	23.0851	NaN	1.91114e+06	2.47398e+06	NaN	2.17925e+06	2.27857e+06	4.3194e+06	4.431e+06	2.39468e+06	3.41819e+06	3.22776e+06	4.18298e+06	8.03741e+06	9.45208e+06	9.63598e+06
Q9HD20	Perilipin-2	PLIN2	11	11	11	39.6	0	24.642	68	7.4839e-05	0.0311633	0.000551833	3.75882e-06	0.819708	1.4183	1.73026	22.9316	22.9218	22.6647	22.7985	23.0399	22.6355	22.5354	22.6201	22.4217	22.5171	22.2105	22.9156	23.143	23.5417	23.3433	23.2835	23.3284	23.3919	8.00017e+06	7.94601e+06	6.64897e+06	7.29512e+06	8.62385e+06	6.51575e+06	6.07899e+06	6.44657e+06	5.61829e+06	6.00237e+06	4.85318e+06	7.91194e+06	9.26269e+06	1.22112e+07	1.06423e+07
P05023	Perilipin-3	PLIN3	11	11	11	41.5	0	51.82	95	0.0077027	0.00915812	0.848942	0.00305404	0.761959	1.03296	1.35567	23.2106	23.0954	23.4366	23.6042	23.7609	23.2565	22.8578	23.1523	22.7805	23.0103	23.1133	23.1654	23.3144	23.4791	23.3631	23.439	23.4283	23.7019	9.70704e+06	8.96207e+06	1.13532e+07	1.27518e+07	1.42149e+07	1.00208e+07	7.60122e+06	9.32259e+06	7.20467e+06	8.44871e+06	9.07395e+06	9.40763e+06	1.04312e+07	1.16927e+07	1.07893e+07
P13637	Procollagen-lysine,2-oxoglutarate 5-dioxygenase 3	PLOD3	17	17	17	29.9	0	69.425	184	0.00200354	0.000389347	0.380383	0.00580421	1.38702	1.10234	0.794757	24.5801	24.345	24.4076	24.5664	24.2819	24.5543	24.9523	24.9248	24.9202	25.0732	24.8691	24.8446	24.9566	24.4502	24.3521	24.7729	24.5791	24.3958	2.50811e+07	2.13096e+07	2.22546e+07	2.48441e+07	2.03977e+07	2.46366e+07	3.24632e+07	3.18502e+07	3.17488e+07	3.53009e+07	3.0644e+07	3.0128e+07	3.25601e+07	2.29215e+07	2.14147e+07
P05026	Mitochondrial-processing peptidase subunit beta	PMPCB	14	14	14	37.4	0	51.234	127	0.000290901	0.00187095	0.0829725	2.45667e-05	1.23656	0.895399	0.724105	23.8128	23.9407	23.8256	23.8552	23.9284	23.8688	24.2789	24.0916	24.0413	24.146	24.0479	24.4273	23.8413	23.7414	23.6444	23.7054	23.8391	23.4765	1.47356e+07	1.61016e+07	1.48669e+07	1.51751e+07	1.59649e+07	1.53188e+07	2.03553e+07	1.7877e+07	1.72644e+07	1.85639e+07	1.73436e+07	2.25606e+07	1.50296e+07	1.40241e+07	1.31121e+07
P54709	Purine nucleoside phosphorylase	PNP	6	6	6	34.6	0	10.66	29	0.00151803	0.0625475	0.000192992	0.0251198	0.714741	0.481414	0.67355	21.109	21.0837	21.2273	20.4876	21.19	20.6439	20.0258	20.4662	20.5335	20.987	20.246	20.5506	19.9749	19.9812	19.3567	20.4966	19.6209	19.8822	2.26174e+06	2.22242e+06	2.45501e+06	1.47022e+06	2.39235e+06	1.63845e+06	1.0675e+06	1.44857e+06	1.51775e+06	2.07834e+06	1.24352e+06	1.53584e+06	1.03049e+06	1.035e+06	671347
P16615;O14983	Polyribonucleotide nucleotidyltransferase 1, mitochondrial	PNPT1	9	9	9	14.9	0	22.539	57	0.00466829	0.0010963	0.422051	0.0143582	1.51864	1.12472	0.740609	21.7531	21.6154	21.6563	22.0199	21.9551	21.8213	22.1414	22.7739	22.5635	22.5992	22.2152	22.0382	22.0655	21.7218	21.7424	22.0616	22.0399	22.1899	3.53456e+06	3.2128e+06	3.30519e+06	4.25256e+06	4.06578e+06	3.70566e+06	4.62621e+06	7.17178e+06	6.19855e+06	6.35385e+06	4.86902e+06	4.30685e+06	4.38912e+06	3.4587e+06	3.50844e+06
P20020;Q16720	Polymerase delta-interacting protein 2	POLDIP2	4	4	4	14.9	0	8.0547	29	0.000845401	0.000152442	0.494556	0.00140878	1.61153	1.09956	0.68231	21.2069	21.6503	21.357	21.0802	21.1828	21.4661	21.9124	22.4333	21.9843	21.9892	21.6511	22.0674	21.6345	21.341	21.2122	21.4772	21.6241	21.5077	2.42054e+06	3.29147e+06	2.68595e+06	2.21703e+06	2.38045e+06	2.89694e+06	3.9472e+06	5.66365e+06	4.14891e+06	4.16302e+06	3.29329e+06	4.3949e+06	3.25562e+06	2.65632e+06	2.42945e+06
P25705	Amidophosphoribosyltransferase	PPAT	9	9	9	28.2	0	49.875	72	0.000992831	0.0179171	0.000109138	0.0484016	0.794102	0.657084	0.827456	23.1659	22.745	22.9343	22.9072	23.0986	22.8947	22.6553	22.4937	22.504	22.5647	22.5743	22.9465	22.2247	22.2211	22.0583	22.7046	22.3866	22.4646	9.41089e+06	7.02955e+06	8.01516e+06	7.86601e+06	8.98197e+06	7.79815e+06	6.60579e+06	5.9058e+06	5.94811e+06	6.20371e+06	6.24513e+06	8.08323e+06	4.90119e+06	4.88897e+06	4.36727e+06
P06576	Peptidyl-prolyl cis-trans isomerase B	PPIB	19	19	19	64.4	0	72.696	385	5.5395e-05	0.000259146	2.57257e-06	0.0417362	1.36842	1.61048	1.17689	26.7035	26.371	26.6547	26.3873	26.4421	26.441	27.1384	26.9461	26.7858	26.8928	26.8855	27.0723	27.3425	27.2373	27.0423	26.9659	27.4002	27.1215	1.09283e+08	8.67885e+07	1.05649e+08	8.77746e+07	9.11728e+07	9.11033e+07	1.47731e+08	1.29296e+08	1.15699e+08	1.24606e+08	1.23977e+08	1.41115e+08	1.70182e+08	1.58214e+08	1.38211e+08
P36542	Lysosomal Pro-X carboxypeptidase	PRCP	13	13	13	33.7	0	20.844	83	1.18522e-06	0.000130713	1.08887e-08	2.94836e-05	1.48801	2.36796	1.59136	23.0215	22.829	22.8445	22.3802	22.6802	22.6969	23.2245	23.5123	23.267	23.1512	23.4401	23.3441	23.7405	24.1556	24.0951	23.8571	23.9295	24.1631	8.51456e+06	7.45099e+06	7.53147e+06	5.45898e+06	6.72079e+06	6.79904e+06	9.80102e+06	1.19649e+07	1.0094e+07	9.31549e+06	1.13808e+07	1.06482e+07	1.40153e+07	1.86879e+07	1.79204e+07
P24539	Peroxiredoxin-2	PRDX2	16	15	15	49	0	126.59	243	0.0151727	0.269635	0.0932725	0.00401472	0.914719	1.12587	1.23084	26.9326	26.695	27.1157	27.1111	27.0891	27.1131	26.734	26.9906	27.0534	26.9936	26.7133	26.8099	27.2402	27.1548	27.2391	27.0776	27.1504	27.2596	1.28092e+08	1.08641e+08	1.45425e+08	1.44962e+08	1.42768e+08	1.45163e+08	1.11618e+08	1.33346e+08	1.39279e+08	1.33624e+08	1.10028e+08	1.17648e+08	1.58532e+08	1.4942e+08	1.58411e+08
O75947	cAMP-dependent protein kinase type II-beta regulatory subunit	PRKAR2B	8	5	5	33	0	22.919	74	0.00631701	0.263695	0.00134234	0.0343122	1.15063	1.48262	1.28853	21.8576	20.9371	21.7051	21.6612	21.5606	21.701	21.8034	21.6852	22.1079	21.8751	21.7609	21.4981	22.2246	22.0402	22.0596	22.3008	22.28	22.0667	3.80008e+06	2.00768e+06	3.4189e+06	3.31643e+06	3.09305e+06	3.4092e+06	3.65997e+06	3.37206e+06	4.52003e+06	3.84646e+06	3.55372e+06	2.96192e+06	4.90085e+06	4.31282e+06	4.37121e+06
P56385	Protein kinase C alpha type	PRKCA	12	12	12	25.9	0	39.293	81	1.23454e-05	2.70008e-05	0.0378952	3.83712e-07	1.35999	0.879814	0.646927	22.6838	22.5123	22.4167	22.4708	22.5169	22.5555	22.8009	23.0608	23.1232	22.7482	22.96	23.0961	22.1915	22.4175	22.3316	22.3931	22.4103	22.3054	6.73758e+06	5.98243e+06	5.59885e+06	5.81279e+06	6.00153e+06	6.16428e+06	7.30726e+06	8.74969e+06	9.13644e+06	7.04515e+06	8.15922e+06	8.96642e+06	4.78969e+06	5.60196e+06	5.27815e+06
P56134	DNA-dependent protein kinase catalytic subunit	PRKDC	116	116	116	35.1	0	323.31	969	4.24837e-06	1.06204e-07	4.82043e-06	0.0442283	1.97563	1.66814	0.844356	26.2932	26.4932	26.2104	26.4377	26.4005	26.3859	27.2342	27.447	27.2735	27.5744	27.2321	27.3386	26.8983	27.1447	27.5327	27.0451	27.0148	26.9342	8.22322e+07	9.446e+07	7.76456e+07	9.08952e+07	8.85814e+07	8.76895e+07	1.57874e+08	1.82966e+08	1.62234e+08	1.99858e+08	1.57645e+08	1.69722e+08	1.25082e+08	1.48378e+08	1.94164e+08
O75964	Neurotrypsin	PRSS12	21	21	21	32.2	0	68.877	121	3.7419e-05	0.00131968	1.21934e-06	0.00294843	2.65242	7.54426	2.84429	21.8827	21.9649	21.9944	21.3482	19.1705	21.0701	23.0935	22.6875	22.8435	22.8995	22.8129	22.9773	24.5046	24.3413	24.7865	24.3368	24.2057	24.1208	3.86678e+06	4.09349e+06	4.17805e+06	2.66961e+06	590059	2.20157e+06	8.95027e+06	6.75489e+06	7.52625e+06	7.82414e+06	7.3683e+06	8.25765e+06	2.38023e+07	2.1255e+07	2.89388e+07
P48047	Phosphoserine aminotransferase	PSAT1	16	16	16	63.8	0	121.26	207	3.24145e-05	0.000892236	1.0021e-06	0.00336336	0.702849	0.523762	0.745199	25.1463	25.2503	25.4135	25.0843	25.0119	25.5507	24.843	24.8642	24.8071	24.6681	24.4686	24.7909	24.2187	24.1933	24.0217	24.4418	24.5826	24.4045	3.71356e+07	3.99115e+07	4.46916e+07	3.55735e+07	3.38323e+07	4.91504e+07	3.00946e+07	3.05401e+07	2.93549e+07	2.66586e+07	2.32157e+07	2.90272e+07	1.95234e+07	1.91827e+07	1.70315e+07
Q93050	Proteasome activator complex subunit 3	PSME3	9	9	9	43.7	0	106.24	128	9.50635e-06	0.00021016	1.97611e-07	0.0014995	0.659463	0.463431	0.702741	24.72	24.7988	24.9031	25.0695	25.023	24.8367	24.0381	24.0163	24.1899	24.2987	24.4196	24.698	23.6712	23.9896	23.527	23.9883	23.7332	23.7582	2.76351e+07	2.91865e+07	3.13747e+07	3.52104e+07	3.40937e+07	2.99634e+07	1.72262e+07	1.69678e+07	1.91375e+07	2.06366e+07	2.24405e+07	2.72169e+07	1.3358e+07	1.66567e+07	1.20874e+07
Q9Y487	Proteasome assembly chaperone 1	PSMG1	3	3	3	10.4	0	10.276	25	0.0122529	0.999399	0.00832271	0.00889138	1.00118	0.515983	0.515372	20.1146	20.6458	20.5105	21.0272	20.8785	20.5801	20.2038	21.0413	21.0423	20.7062	20.4046	20.2986	20.068	NaN	20.0695	NaN	20.0585	19.7062	1.13527e+06	1.64061e+06	1.49374e+06	2.13707e+06	1.92777e+06	1.56757e+06	1.20767e+06	2.15805e+06	2.15955e+06	1.71075e+06	1.38802e+06	1.2897e+06	1.09918e+06	NaN	1.10033e+06
P61421	Tyrosine-protein phosphatase non-receptor type 12	PTPN12	6	6	6	12.7	0	13.419	34	0.0115603	0.0286728	0.556268	0.00352324	0.794621	1.09997	1.38428	20.9352	20.9008	20.605	20.9265	20.7847	20.999	20.6581	20.4655	20.3608	20.2609	20.6478	20.7408	20.8537	21.0057	20.7734	20.8988	20.8737	21.4818	2.00504e+06	1.9578e+06	1.59486e+06	1.99299e+06	1.80642e+06	2.0957e+06	1.65466e+06	1.44787e+06	1.34652e+06	1.25643e+06	1.64288e+06	1.75228e+06	1.89491e+06	2.10545e+06	1.79232e+06
P38606	Tyrosine-protein phosphatase non-receptor type 23	PTPN23	10	10	10	9.2	0	19.255	31	0.0111489	0.00320189	0.499178	0.0315825	0.601104	0.849982	1.41404	21.9512	22.3957	22.4791	22.2022	22.4503	21.5291	20.9419	21.7345	21.3376	21.6501	21.1539	21.8014	21.7106	21.9461	21.7443	22.0074	22.043	22.29	4.0548e+06	5.51795e+06	5.84633e+06	4.82534e+06	5.73078e+06	3.02625e+06	2.01437e+06	3.48928e+06	2.65007e+06	3.29101e+06	2.33323e+06	3.6549e+06	3.43196e+06	4.04049e+06	3.51307e+06
P21281;P15313	Pseudouridylate synthase 7 homolog	PUS7	10	10	10	23.4	0	14.692	29	2.27123e-06	2.47476e-06	4.78002e-08	0.0297288	0.574564	0.471861	0.821251	22.4646	22.6287	22.5238	22.6557	22.3441	22.5693	21.5515	21.8311	21.991	21.7745	21.53	21.6798	21.1716	21.731	21.4847	21.2627	21.6305	21.3448	5.78787e+06	6.48511e+06	6.03031e+06	6.60762e+06	5.32408e+06	6.22352e+06	3.0736e+06	3.73092e+06	4.16822e+06	3.58738e+06	3.02814e+06	3.35946e+06	2.36204e+06	3.48083e+06	2.93453e+06
P21283	Periodic tryptophan protein 2 homolog	PWP2	10	10	10	18.3	0	31.9	78	0.0377833	0.146113	0.43145	0.0133795	1.25726	0.893186	0.710421	22.5778	22.8745	22.7223	22.8587	22.931	22.5611	22.9546	23.298	22.9333	23.1268	23.141	23.065	22.7661	22.4493	21.7673	23.1106	22.4449	22.7199	6.2603e+06	7.68972e+06	6.91981e+06	7.60597e+06	7.99685e+06	6.18825e+06	8.12874e+06	1.03133e+07	8.00961e+06	9.15926e+06	9.24986e+06	8.7752e+06	7.13311e+06	5.72681e+06	3.56952e+06
Q9Y5K8	Peroxidasin homolog	PXDN	13	13	13	13.1	0	58.219	103	0.000222711	0.0162498	1.49066e-05	0.00570093	1.21499	1.53482	1.26324	21.9396	21.9266	22.15	22.4732	21.9337	22.1212	22.3642	22.2407	22.3117	22.4192	22.607	22.3407	22.6091	22.8069	22.5784	22.8524	22.8125	22.6505	4.02233e+06	3.98625e+06	4.65387e+06	5.82247e+06	4.00591e+06	4.56189e+06	5.39877e+06	4.95585e+06	5.20584e+06	5.60856e+06	6.3883e+06	5.31154e+06	6.3976e+06	7.33772e+06	6.2629e+06
P36543	Nicotinate-nucleotide pyrophosphorylase [carboxylating]	QPRT	8	8	8	35.7	0	29.078	67	0.00204766	0.97986	0.00134717	0.000923143	0.971409	1.64747	1.69595	21.7883	22.699	22.3832	22.6612	22.7411	22.7334	22.2261	22.572	22.3701	22.5096	22.1524	22.981	23.108	23.1424	23.502	23.2181	23.4161	23.1066	3.62186e+06	6.80895e+06	5.47034e+06	6.63286e+06	7.01057e+06	6.97325e+06	4.90595e+06	6.23518e+06	5.4209e+06	5.97124e+06	4.66162e+06	8.27886e+06	9.04068e+06	9.25884e+06	1.18797e+07
O75348;O95670	Ras-related protein Rab-24	RAB24	5	5	5	35.5	0	7.82	21	0.00174194	0.121478	0.00024701	0.0157329	1.1906	1.59211	1.33723	20.882	20.4638	20.8323	20.9251	20.7719	20.9699	21.0694	21.0317	20.9752	21.2166	21.0179	21.0868	22.0335	21.5512	21.2014	21.4164	21.2851	21.2597	1.93245e+06	1.44616e+06	1.86701e+06	1.99105e+06	1.79046e+06	2.05385e+06	2.2005e+06	2.14374e+06	2.06141e+06	2.43687e+06	2.12333e+06	2.2272e+06	4.29284e+06	3.07297e+06	2.41133e+06
Q9UI12	Arginine--tRNA ligase, cytoplasmic	RARS	36	36	36	58.2	0	189.55	394	0.037935	0.910517	0.0212533	0.0473501	0.982326	0.862639	0.878159	25.9991	26.087	25.8607	26.0678	25.976	25.9666	25.7547	26.0955	25.8727	26.015	25.9195	26.1227	25.7919	25.6658	25.5951	25.9459	25.7354	25.9218	6.7067e+07	7.12803e+07	6.09321e+07	7.0338e+07	6.60017e+07	6.55731e+07	5.66157e+07	7.17015e+07	6.14411e+07	6.78102e+07	6.34669e+07	7.30662e+07	5.80946e+07	5.32324e+07	5.06866e+07
Q04656	Retinol-binding protein 1	RBP1	15	15	15	80	0	114.2	233	0.00188976	0.0224686	0.0953283	0.000267724	0.658273	1.402	2.12981	25.059	24.8207	25.4681	25.1463	24.7101	25.2933	24.169	24.3283	24.1375	24.7001	24.8897	24.628	25.275	25.149	25.6337	25.1318	26.2413	25.7861	3.49551e+07	2.9633e+07	4.64154e+07	3.71356e+07	2.74461e+07	4.11189e+07	1.88623e+07	2.10643e+07	1.84549e+07	2.72566e+07	3.10847e+07	2.59279e+07	4.06007e+07	3.72052e+07	5.2061e+07
Q9Y2Q0	RNA 3-terminal phosphate cyclase-like protein	RCL1	4	4	4	18.5	0	22.837	38	0.0184587	0.187918	0.169387	0.00504138	1.29012	0.793413	0.614991	21.0546	21.1803	21.137	20.737	21.3414	20.7594	21.2054	21.333	21.3714	21.4309	21.603	21.5349	20.7747	NaN	21.1703	20.9492	20.7428	20.6267	2.17804e+06	2.37632e+06	2.30606e+06	1.74767e+06	2.65706e+06	1.77502e+06	2.41803e+06	2.64164e+06	2.71289e+06	2.82712e+06	3.1853e+06	3.03844e+06	1.79394e+06	NaN	2.35991e+06
Q8N5M1	Reticulocalbin-2	RCN2	8	8	8	28.1	0	39.565	74	0.00043069	0.0155	3.54323e-05	0.0164157	1.27379	1.60335	1.25873	23.6869	23.297	23.5511	23.5385	23.171	23.67	24.1395	23.636	23.6985	24.0641	23.8412	23.614	24.0287	24.2384	24.1504	24.1216	24.3489	24.1653	1.35042e+07	1.03061e+07	1.2291e+07	1.21841e+07	9.44422e+06	1.33469e+07	1.84805e+07	1.3036e+07	1.36132e+07	1.75394e+07	1.50285e+07	1.28387e+07	1.71143e+07	1.97918e+07	1.86206e+07
P46100	Proto-oncogene tyrosine-protein kinase receptor Ret;Soluble RET kinase fragment;Extracellular cell-membrane anchored RET cadherin 120 kDa fragment	RET	27	27	27	33.2	0	120.49	139	1.84955e-06	0.000872354	2.4243e-08	1.75152e-05	3.5643	21.1211	5.92574	21.6172	21.0958	21.3909	21.3307	19.9673	21.7477	23.3373	23.5565	23.0351	23.1841	23.3917	21.414	26.313	25.7847	25.8216	25.8488	24.9406	24.9306	3.21681e+06	2.24114e+06	2.74981e+06	2.63743e+06	1.02508e+06	3.52136e+06	1.05981e+07	1.23371e+07	8.5952e+06	9.53036e+06	1.10053e+07	2.79419e+06	8.33686e+07	5.78054e+07	5.93029e+07
Q9UBB4	Required for meiotic nuclear division protein 1 homolog	RMND1	4	4	4	10.9	0	4.5651	15	0.0340193	0.503175	0.109132	0.0123349	1.14123	0.768037	0.672989	NaN	NaN	NaN	20.0145	NaN	19.3008	19.6178	20.0519	19.9944	19.7054	19.6876	20.1411	19.295	19.6029	19.0137	19.4082	NaN	19.6399	NaN	NaN	NaN	1.05917e+06	NaN	645832	804537	1.08698e+06	1.04451e+06	854902	844419	1.15631e+06	643241	796271	529290
Q99700	RING finger protein 214	RNF214	3	3	3	7.4	0	3.8318	17	0.0229806	0.979795	0.0214789	0.0146751	1.04033	0.498652	0.479322	20.6408	20.6408	20.7907	NaN	NaN	20.5525	20.5581	20.2757	20.6104	20.344	21.0791	NaN	NaN	NaN	NaN	20.689	NaN	NaN	1.63493e+06	1.63493e+06	1.81395e+06	NaN	NaN	1.53787e+06	1.54385e+06	1.26939e+06	1.60084e+06	1.33093e+06	2.21535e+06	NaN	NaN	NaN	NaN
Q8WWM7	mRNA cap guanine-N7 methyltransferase	RNMT	11	11	11	33.4	0	62.984	122	0.0029814	0.716077	0.000907471	0.0043336	0.948044	0.733031	0.773203	23.2307	23.3572	23.0333	23.3605	23.3994	22.9901	22.9514	23.1706	23.0805	23.1711	23.0957	23.4456	22.7	22.6489	22.7414	23.0327	22.9206	22.6484	9.84323e+06	1.07453e+07	8.58448e+06	1.07699e+07	1.10642e+07	8.33124e+06	8.11073e+06	9.4416e+06	8.86998e+06	9.44487e+06	8.96393e+06	1.14243e+07	6.81367e+06	6.57655e+06	7.01203e+06
Q9Y679	Aminopeptidase B	RNPEP	24	24	24	54.2	0	74.535	219	0.0203237	0.221751	0.158794	0.00574739	0.864874	1.15635	1.33702	24.4663	24.548	24.7335	24.8893	25.1746	24.7566	24.5874	24.2917	24.5894	24.5612	24.8027	24.5477	24.6779	25.0203	25.0047	25.0727	24.9846	25.1374	2.31788e+07	2.45293e+07	2.78949e+07	3.10761e+07	3.78713e+07	2.83452e+07	2.52084e+07	2.05367e+07	2.52433e+07	2.47547e+07	2.92655e+07	2.45242e+07	2.68403e+07	3.40299e+07	3.36639e+07
O94766	Ribonucleoside-diphosphate reductase large subunit	RRM1	17	17	17	35.1	0	65.275	157	1.34059e-06	6.80075e-06	1.59095e-08	0.00132037	0.555176	0.39087	0.704047	24.7104	24.5307	24.6137	24.8706	24.62	24.5532	23.5792	23.7762	23.61	23.7693	24.0525	23.9814	22.9394	23.0742	23.1531	23.5565	23.3761	23.5757	2.74518e+07	2.42369e+07	2.56721e+07	3.06759e+07	2.57845e+07	2.46178e+07	1.25328e+07	1.43664e+07	1.28032e+07	1.42979e+07	1.7399e+07	1.65623e+07	8.04354e+06	8.83133e+06	9.32776e+06
P46379	Retrotransposon-like protein 1	RTL1	52	52	52	51.2	0	323.31	796	0.0153975	0.96707	0.0145156	0.00887143	1.02509	0.750517	0.732149	27.4483	27.3756	27.5297	27.5125	27.5886	27.5157	27.5788	27.6392	27.5759	27.4251	27.4433	27.5198	26.6259	26.7535	26.6342	27.1973	27.4428	27.5431	1.83131e+08	1.74131e+08	1.93761e+08	1.91464e+08	2.01835e+08	1.91889e+08	2.00468e+08	2.09039e+08	2.00066e+08	1.8021e+08	1.82497e+08	1.92436e+08	1.03561e+08	1.13137e+08	1.04158e+08
O75531	RuvB-like 1	RUVBL1	25	25	25	64.5	0	167.64	361	0.00620952	0.206043	0.00125577	0.0437474	0.877754	0.72648	0.827659	26.8868	26.6866	27.0216	27.0483	26.7598	26.9637	26.4943	26.6506	26.6536	26.6603	26.8686	26.9056	26.3858	26.3304	26.0314	26.7079	26.5139	26.5749	1.24089e+08	1.08011e+08	1.36242e+08	1.38787e+08	1.13632e+08	1.30883e+08	9.4532e+07	1.05349e+08	1.05568e+08	1.0606e+08	1.22533e+08	1.25717e+08	8.76834e+07	8.43801e+07	6.85855e+07
P80723	RuvB-like 2	RUVBL2	32	32	32	78	0	232.84	446	0.0170902	0.659807	0.00622455	0.0356362	0.95269	0.821874	0.862688	26.6534	26.6921	26.6285	26.6527	26.8633	26.8339	26.6983	26.5333	26.5588	26.5916	26.7308	26.7909	26.257	26.3156	26.3767	26.2939	26.6683	26.6693	1.05554e+08	1.08423e+08	1.03747e+08	1.05502e+08	1.22084e+08	1.19621e+08	1.0889e+08	9.71224e+07	9.88543e+07	1.01127e+08	1.11371e+08	1.16109e+08	8.01945e+07	8.35189e+07	8.7132e+07
Q07812	Secretogranin-2;Secretoneurin;Manserin	SCG2	17	17	17	41.8	0	96.461	142	1.56721e-06	0.632924	2.46127e-07	7.33066e-08	0.901803	4.21885	4.67824	23.7067	23.4409	23.4874	23.6425	23.358	23.4704	23.6162	23.6405	23.3983	23.5198	23.3335	22.4216	26.0576	25.7343	25.9418	25.2403	25.0166	25.3015	1.36908e+07	1.13871e+07	1.17601e+07	1.30949e+07	1.07512e+07	1.16224e+07	1.28583e+07	1.30767e+07	1.10558e+07	1.20272e+07	1.05702e+07	5.6179e+06	6.98424e+07	5.58208e+07	6.44555e+07
P51572	Protein SEC13 homolog	SEC13	7	7	7	37.3	0	73.328	119	0.0384063	0.0260156	0.980929	0.03739	0.846313	0.988957	1.16855	24.0678	23.8249	24.158	24.0582	24.309	24.2443	23.9163	23.8798	23.7811	23.8983	23.962	23.8223	24.068	23.9511	23.9983	24.3892	24.071	24.0953	1.75845e+07	1.48597e+07	1.8719e+07	1.74679e+07	2.07844e+07	1.98729e+07	1.58316e+07	1.5436e+07	1.44153e+07	1.56353e+07	1.63411e+07	1.48329e+07	1.75869e+07	1.62181e+07	1.67575e+07
O75934	Protein transport protein Sec23A	SEC23A	15	12	12	30.6	0	41.437	113	0.00535355	0.0777874	0.100198	0.000992734	0.868534	1.14096	1.31366	22.9741	22.8662	23.2595	23.2007	23.0983	23.2169	22.9609	22.8796	22.8459	22.6923	22.8475	23.1664	23.4631	23.1785	23.4192	23.2228	23.1317	23.3506	8.23936e+06	7.64561e+06	1.00417e+07	9.64066e+06	8.9801e+06	9.74952e+06	8.16431e+06	7.71695e+06	7.53878e+06	6.7774e+06	7.54715e+06	9.41415e+06	1.15637e+07	9.49344e+06	1.12171e+07
P54687	Protein transport protein Sec24C	SEC24C	19	19	19	25.8	0	65.801	219	0.00563087	0.988178	0.00306042	0.00410654	0.993037	0.842637	0.848546	24.5173	24.3834	24.5759	24.5168	24.3572	24.615	24.4088	24.4896	24.5911	24.5062	24.3643	24.5509	24.1881	24.3989	24.1796	24.4188	24.1166	24.1705	2.40128e+07	2.18844e+07	2.50082e+07	2.40045e+07	2.14906e+07	2.56953e+07	2.22731e+07	2.35561e+07	2.52731e+07	2.38288e+07	2.15966e+07	2.45786e+07	1.91137e+07	2.21208e+07	1.90014e+07
O15382	Septin-6	SEPT6	22	22	16	59.2	0	265.76	315	0.0128922	0.936768	0.0131237	0.00658279	0.98036	1.2679	1.2933	26.1303	26.1213	26.1499	25.8639	25.7331	25.998	25.936	26.204	26.0052	26.0295	26.0992	25.5039	26.1777	26.357	26.2819	26.4735	26.4668	26.3209	7.34521e+07	7.29953e+07	7.44568e+07	6.10674e+07	5.57744e+07	6.70159e+07	6.41969e+07	7.73019e+07	6.73512e+07	6.84952e+07	7.18856e+07	4.75816e+07	7.59054e+07	8.59503e+07	8.15906e+07
Q9P287	Serpin H1	SERPINH1	20	20	20	57.4	0	146.19	299	2.57685e-06	1.28981e-05	4.06008e-08	0.00292705	1.45201	1.7997	1.23945	26.0365	26.075	26.322	25.941	26.0913	26.3156	26.6221	26.806	26.6759	26.7204	26.7791	26.4145	26.9891	26.9083	26.8809	26.9166	27.1302	27.0677	6.88284e+07	7.06899e+07	8.38903e+07	6.44198e+07	7.14931e+07	8.35189e+07	1.03288e+08	1.1733e+08	1.07213e+08	1.10571e+08	1.15163e+08	8.94452e+07	1.33207e+08	1.25952e+08	1.23583e+08
P12694	Splicing factor 1	SF1	13	13	13	25.5	0	71.381	150	0.00301669	0.215096	0.000556848	0.0184523	0.907941	0.766654	0.844388	25.2944	25.3322	25.0131	24.9676	25.1352	25.0659	25.1565	24.8655	24.8983	24.8806	25.046	25.1343	24.8028	24.8259	24.801	24.8629	24.5274	24.702	4.11503e+07	4.22427e+07	3.38605e+07	3.28093e+07	3.6851e+07	3.51227e+07	3.73991e+07	3.05676e+07	3.12705e+07	3.08892e+07	3.46415e+07	3.6828e+07	2.92676e+07	2.974e+07	2.92311e+07
P21953	Splicing factor 3A subunit 3	SF3A3	20	20	20	45.7	0	109.45	255	0.0274391	0.835988	0.0132535	0.0407752	0.972852	0.861207	0.88524	25.2746	24.9901	25.1598	25.1863	25.0772	25.2365	24.9785	25.0853	25.177	25.1021	25.1884	25.1632	24.7756	25.1339	24.8281	24.9895	25.0739	24.8091	4.05894e+07	3.3325e+07	3.74847e+07	3.81796e+07	3.53989e+07	3.95315e+07	3.30581e+07	3.55982e+07	3.79343e+07	3.60151e+07	3.82353e+07	3.75732e+07	2.87209e+07	3.68178e+07	2.97854e+07
Q9NYF8	SHC-transforming protein 1	SHC1	5	5	5	14.4	0	13.384	29	0.00481385	0.389777	0.00110513	0.0163718	0.794615	0.477068	0.600376	21.3551	21.4281	20.658	21.4126	21.616	21.4608	21.0427	20.8912	20.6413	20.6325	21.5765	21.1083	20.424	NaN	NaN	NaN	NaN	21.0407	2.68241e+06	2.82164e+06	1.65454e+06	2.79148e+06	3.21414e+06	2.88632e+06	2.16015e+06	1.94481e+06	1.6355e+06	1.62555e+06	3.12733e+06	2.26064e+06	1.40681e+06	NaN	NaN
Q9BUT1	Serine hydroxymethyltransferase, mitochondrial	SHMT2	28	28	27	63.3	0	168.33	325	0.000892225	9.42864e-05	0.0399096	0.0186795	1.24944	1.11131	0.889446	25.9827	25.902	25.9862	25.9864	26.0415	25.8309	26.2291	26.2058	26.3073	26.2339	26.2466	26.432	26.2078	26.1419	25.9262	26.2522	26.0776	26.0221	6.63089e+07	6.27016e+07	6.647e+07	6.64792e+07	6.90673e+07	5.96864e+07	7.86585e+07	7.73984e+07	8.30398e+07	7.89207e+07	7.96185e+07	9.05367e+07	7.75057e+07	7.40451e+07	6.37623e+07
P55957	Neutral amino acid transporter B(0)	SLC1A5	7	7	7	17.9	0	46.925	76	0.00043069	0.320608	0.000926472	5.60916e-05	1.14821	0.666737	0.580674	22.9675	22.9306	23.2264	23.2396	22.8556	23.1713	23.1516	23.1527	23.3173	23.1657	23.1275	23.6463	22.396	22.667	22.1729	22.886	22.1317	22.5286	8.20175e+06	7.99463e+06	9.81393e+06	9.90414e+06	7.58964e+06	9.44618e+06	9.31807e+06	9.32518e+06	1.04522e+07	9.40959e+06	9.16371e+06	1.31294e+07	5.51909e+06	6.65958e+06	4.72833e+06
O00499	Mitochondrial glutamate carrier 1	SLC25A22	11	11	11	54.2	0	70.206	84	0.00238681	0.000467574	0.34629	0.00808504	1.33615	1.09504	0.819545	23.12	23.2785	23.2432	23.4264	23.4095	23.317	23.6105	23.7558	23.6501	23.758	23.7603	23.7819	23.4645	23.5492	23.0214	23.5387	23.3438	23.6085	9.11619e+06	1.01748e+07	9.92888e+06	1.12732e+07	1.1142e+07	1.045e+07	1.28076e+07	1.41647e+07	1.3164e+07	1.41863e+07	1.4209e+07	1.44233e+07	1.15749e+07	1.22748e+07	8.51397e+06
Q13867	Long-chain fatty acid transport protein 3	SLC27A3	7	7	7	19.2	0	34.368	44	0.000413144	0.0917691	3.81052e-05	0.00277038	1.30497	2.19298	1.68048	21.3488	20.8986	20.4849	21.0574	20.6301	20.8328	21.3067	21.5135	21.3813	21.2576	21.2781	20.9205	22.3211	21.77	22.4412	21.6698	21.527	22.2341	2.67072e+06	1.95481e+06	1.46747e+06	2.18227e+06	1.62285e+06	1.86766e+06	2.59392e+06	2.9937e+06	2.73157e+06	2.50712e+06	2.543e+06	1.98471e+06	5.23987e+06	3.57621e+06	5.69475e+06
P53004	4F2 cell-surface antigen heavy chain	SLC3A2	11	11	11	26.2	0	35.894	109	0.007542	0.0157567	0.5978	0.00220392	1.42742	0.904468	0.633638	23.1634	23.232	23.442	23.3259	23.7741	23.2548	24.1088	23.8389	23.9447	24.0106	24.0294	23.2887	23.2117	22.9197	22.9973	23.6292	22.9997	23.5008	9.3946e+06	9.8521e+06	1.13958e+07	1.05147e+07	1.43456e+07	1.0009e+07	1.80914e+07	1.50046e+07	1.61463e+07	1.69009e+07	1.71226e+07	1.0247e+07	9.71444e+06	7.93446e+06	8.37292e+06
Q9H3K6	SRA stem-loop-interacting RNA-binding protein, mitochondrial	SLIRP	5	5	5	56	0	13.56	71	0.0008559	0.000150272	0.468139	0.00152157	1.38658	1.07135	0.772659	23.9809	24.0522	24.1825	24.1129	23.9678	24.3382	24.7883	24.5522	24.4245	24.7556	24.3423	24.5814	24.2738	24.1597	24.0868	24.3108	24.3354	24.0764	1.65566e+07	1.73954e+07	1.90396e+07	1.81429e+07	1.64069e+07	2.12094e+07	2.89749e+07	2.46008e+07	2.25168e+07	2.83255e+07	2.12698e+07	2.51038e+07	2.02835e+07	1.87411e+07	1.78176e+07
Q14137	Spectrin alpha chain, non-erythrocytic 1	SPTAN1	152	152	152	69.6	0	323.31	1631	1.46912e-05	0.0002392	3.74175e-07	0.00332281	1.29994	1.57858	1.21435	27.922	28.1318	28.266	28.1131	28.0736	28.0733	28.4745	28.6107	28.4724	28.4168	28.615	28.2512	28.8194	28.5756	28.6802	28.7052	28.8743	28.8733	2.54308e+08	2.94114e+08	3.22785e+08	2.90326e+08	2.82485e+08	2.82426e+08	3.72974e+08	4.09901e+08	3.72432e+08	3.58351e+08	4.11124e+08	3.19491e+08	4.73701e+08	4.00049e+08	4.30131e+08
O95861	Spectrin beta chain, non-erythrocytic 1	SPTBN1	119	119	110	60.2	0	323.31	1434	0.000354666	0.309556	4.29752e-05	0.000725017	1.06634	1.31149	1.2299	27.9789	28.0161	28.1401	28.1705	28.0949	27.9111	28.1528	28.1695	28.0652	28.1071	28.2562	28.1267	28.4162	28.312	28.2454	28.5129	28.6218	28.5328	2.64538e+08	2.71448e+08	2.95811e+08	3.0211e+08	2.86687e+08	2.52394e+08	2.98426e+08	3.01901e+08	2.80845e+08	2.89121e+08	3.206e+08	2.93076e+08	3.58202e+08	3.33243e+08	3.18209e+08
Q6PJG6	Proto-oncogene tyrosine-protein kinase Src	SRC	16	16	14	44.6	0	55.215	150	0.00124273	0.0508688	0.000150747	0.024037	1.17661	1.42552	1.21154	23.8091	23.8045	23.6373	23.5655	23.5058	23.9184	23.8966	24.0532	23.9343	24.1176	23.7323	23.9287	24.4664	24.0638	24.1293	24.42	24.1199	24.0991	1.46978e+07	1.4651e+07	1.30478e+07	1.24143e+07	1.19111e+07	1.58546e+07	1.56168e+07	1.74074e+07	1.60303e+07	1.82021e+07	1.39359e+07	1.59682e+07	2.31804e+07	1.75358e+07	1.83503e+07
Q15059	Spermidine synthase	SRM	6	6	6	27.2	0	22.549	60	5.39697e-05	0.00160802	2.02172e-06	0.00474086	0.613179	0.397886	0.64889	22.6751	22.435	22.5545	23.0075	23.0004	23.1272	21.573	22.2168	22.2309	21.9293	22.162	22.4403	21.2301	21.3125	21.2916	21.7514	21.8519	21.3985	6.69708e+06	5.67033e+06	6.16e+06	8.43233e+06	8.39093e+06	9.1618e+06	3.11975e+06	4.87442e+06	4.9223e+06	3.99372e+06	4.69274e+06	5.69119e+06	2.45978e+06	2.60436e+06	2.56691e+06
O60885	Single-stranded DNA-binding protein, mitochondrial	SSBP1	10	10	10	58.1	0	89.354	151	0.00368401	0.00226996	0.999785	0.00218244	1.28958	1.00523	0.779498	25.7815	25.7608	25.9143	25.9239	25.7541	25.9025	26.482	26.0396	26.1236	26.1096	26.2312	26.221	26.191	25.8022	25.6213	25.756	25.8832	25.7731	5.76773e+07	5.68556e+07	6.32385e+07	6.36607e+07	5.65922e+07	6.27234e+07	9.37295e+07	6.89764e+07	7.31118e+07	7.24057e+07	7.87731e+07	7.82181e+07	7.66084e+07	5.85108e+07	5.16155e+07
Q9NXR7	Double-stranded RNA-binding protein Staufen homolog 1	STAU1	5	5	5	10.6	0	10.831	13	0.0117275	0.00973423	0.984245	0.00692815	0.520988	1.04631	2.00831	21.7745	21.6233	21.1627	21.8496	21.7521	21.4285	NaN	21.1745	NaN	NaN	NaN	21.6826	21.6472	21.6142	22.1245	21.1939	21.5812	21.7753	3.58738e+06	3.23044e+06	2.34751e+06	3.77907e+06	3.53211e+06	2.82242e+06	NaN	2.36679e+06	NaN	NaN	NaN	3.36599e+06	3.2844e+06	3.21013e+06	4.57234e+06
Q5VW32	Stathmin-2	STMN2	5	3	3	28.5	0	14.59	48	7.2409e-05	0.0011119	3.21694e-06	0.012616	0.797034	0.674516	0.846283	25.2202	25.0788	25.0385	25.2497	25.2659	25.0883	24.6425	24.8845	24.8396	24.6932	24.8887	25.0138	24.5639	24.4629	24.5426	24.7882	24.4422	24.7165	3.90874e+07	3.54382e+07	3.44619e+07	3.98949e+07	4.03454e+07	3.56723e+07	2.61898e+07	3.09728e+07	3.00237e+07	2.71265e+07	3.10631e+07	3.38769e+07	2.48011e+07	2.31242e+07	2.44376e+07
P35613	Stomatin-like protein 2, mitochondrial	STOML2	20	20	20	66.3	0	213.88	261	0.0215914	0.0317634	0.829153	0.00996681	1.25258	0.944047	0.753684	25.5411	25.2657	25.2972	25.6221	26.0245	25.4959	25.9171	25.6462	26.0443	25.9904	25.8696	25.8321	25.4245	25.3723	25.239	25.7517	25.3904	25.6435	4.88244e+07	4.03398e+07	4.12303e+07	5.16441e+07	6.82582e+07	4.73185e+07	6.33614e+07	5.2514e+07	6.92015e+07	6.66638e+07	6.13092e+07	5.97361e+07	4.50336e+07	4.34334e+07	3.96001e+07
P20290	Stimulated by retinoic acid gene 6 protein homolog	STRA6	8	8	8	21	0	39.881	76	8.76308e-07	7.96135e-06	6.28189e-09	0.000220958	1.73761	2.63589	1.51696	22.6279	22.3207	22.6394	22.7372	22.2612	22.1659	23.3038	23.3012	23.0332	23.4628	23.3005	23.196	23.7789	23.8498	23.8783	24.1961	23.8447	23.6297	6.48152e+06	5.23842e+06	6.53339e+06	6.99164e+06	5.02677e+06	4.70545e+06	1.03548e+07	1.03362e+07	8.58389e+06	1.15613e+07	1.03312e+07	9.6093e+06	1.43934e+07	1.51184e+07	1.542e+07
O43684	Synaptopodin-2	SYNPO2	21	21	21	37.1	0	81.633	195	0.000216155	0.962671	5.56328e-05	8.92692e-05	1.01389	1.59573	1.57386	24.1866	24.4792	23.9901	24.1338	23.8788	23.9116	24.3722	24.0548	24.1436	24.0057	24.0118	24.1668	24.9383	24.8002	25.0367	24.7487	24.4627	24.6568	1.90938e+07	2.33869e+07	1.66625e+07	1.84076e+07	1.54254e+07	1.57801e+07	2.17152e+07	1.74267e+07	1.85331e+07	1.68436e+07	1.6915e+07	1.88335e+07	3.21497e+07	2.92149e+07	3.4419e+07
P41223	Transducin beta-like protein 3	TBL3	23	23	23	44.3	0	86.458	194	0.00138573	0.160263	0.00878238	0.00019385	1.17601	0.743911	0.632574	23.876	23.9034	24.1035	24.2884	24.4291	24.0448	24.2284	24.2919	24.3001	24.4026	24.5138	24.3768	23.6707	23.5846	23.3047	24.1383	23.4784	23.8393	1.53954e+07	1.56906e+07	1.80251e+07	2.04898e+07	2.25887e+07	1.73064e+07	1.96551e+07	2.05395e+07	2.06566e+07	2.21776e+07	2.39546e+07	2.17845e+07	1.33534e+07	1.25798e+07	1.03613e+07
Q13895	TRPM8 channel-associated factor 1	TCAF1	19	19	19	28.6	0	69.404	136	6.21332e-08	2.73447e-10	6.37273e-09	0.0175622	0.431015	0.508714	1.18027	25.8365	25.8629	25.7115	25.736	26.0605	25.9265	24.4818	24.8324	24.7247	24.4205	24.6943	24.6822	24.8885	24.8988	24.6938	24.8708	24.8884	25.05	5.99186e+07	6.10251e+07	5.49456e+07	5.58866e+07	6.99829e+07	6.37755e+07	2.34291e+07	2.98743e+07	2.77253e+07	2.24545e+07	2.71472e+07	2.69205e+07	3.10588e+07	3.12814e+07	2.71378e+07
Q7L1Q6	Teneurin-3	TENM3	4	4	4	3.4	0	7.0512	17	0.0025215	0.000757899	0.73298	0.00340204	3.13634	1.26385	0.402969	NaN	NaN	NaN	NaN	NaN	NaN	20.8248	20.0493	21.3071	20.683	21.1567	20.5088	NaN	NaN	NaN	NaN	20.5668	NaN	NaN	NaN	NaN	NaN	NaN	NaN	1.85733e+06	1.08503e+06	2.59463e+06	1.68346e+06	2.33777e+06	1.49198e+06	NaN	NaN	NaN
Q9Y6E2	Testin	TES	14	14	14	38.5	0	33.475	84	0.00029334	2.29146e-05	0.0445364	0.00336074	0.560993	0.786277	1.40158	24.0325	24.2055	24.1396	24.0947	24.0705	24.3282	22.9338	23.034	23.4427	23.0328	23.3433	23.8737	23.5601	23.9261	23.8687	23.7257	23.8884	23.8102	1.71595e+07	1.93456e+07	1.84818e+07	1.79154e+07	1.76174e+07	2.10629e+07	8.01238e+06	8.58865e+06	1.14013e+07	8.58151e+06	1.06423e+07	1.53709e+07	1.23679e+07	1.59395e+07	1.53177e+07
Q9H0W9	Protein-glutamine gamma-glutamyltransferase 2	TGM2	5	5	5	10.6	0	6.4384	11	0.00752982	0.721813	0.00250815	0.0119004	1.31248	2.32891	1.77443	NaN	NaN	NaN	NaN	NaN	NaN	NaN	NaN	NaN	NaN	NaN	NaN	20.3422	20.9224	21.1185	20.47	20.7026	20.5938	NaN	NaN	NaN	NaN	NaN	NaN	NaN	NaN	NaN	NaN	NaN	NaN	1.32927e+06	1.98733e+06	2.27668e+06
Q53FT3	Tight junction protein ZO-1	TJP1	12	12	12	10.9	0	23.936	47	0.00933122	0.0724368	0.199492	0.00205601	0.770627	1.20653	1.56565	22.3073	22.5038	21.8754	22.4616	22.7778	22.29	22.2949	21.8145	21.5971	22.1967	21.9732	22.1212	22.351	22.6812	22.6888	22.4655	22.6575	23.0473	5.18999e+06	5.94729e+06	3.84726e+06	5.77584e+06	7.19119e+06	5.12813e+06	5.14557e+06	3.68824e+06	3.1723e+06	4.80698e+06	4.11711e+06	4.56189e+06	5.3496e+06	6.72545e+06	6.76098e+06
Q9HB07	Transketolase	TKT	33	33	33	71.6	0	189.34	449	8.12673e-07	7.14338e-06	5.2437e-09	0.000183267	0.699113	0.527896	0.755095	27.4734	27.3754	27.3689	27.3112	27.5173	27.4279	26.7354	26.7212	26.9372	26.8523	26.8027	27.2629	26.4933	26.4966	26.4917	26.4754	26.5278	26.4684	1.86345e+08	1.74107e+08	1.73324e+08	1.66529e+08	1.92102e+08	1.8056e+08	1.11727e+08	1.10632e+08	1.28501e+08	1.21157e+08	1.17062e+08	1.61046e+08	9.44665e+07	9.46829e+07	9.43618e+07
Q9Y224	Transducin-like enhancer protein 3	TLE3	10	10	6	20.7	0	27.143	81	0.000189918	0.00878845	0.00780395	1.15737e-05	0.698156	1.45811	2.08852	23.0655	22.8275	23.3318	23.3307	22.9049	22.9162	22.4277	22.4181	22.1938	22.6341	22.555	22.9943	23.8573	23.5731	23.9735	23.6247	23.2953	23.26	8.77824e+06	7.44324e+06	1.05578e+07	1.05497e+07	7.85348e+06	7.91523e+06	5.64171e+06	5.60429e+06	4.79733e+06	6.50943e+06	6.16214e+06	8.35553e+06	1.51972e+07	1.24799e+07	1.64719e+07
Q96GQ5	Transmembrane protein 206	TMEM206	2	2	2	12.3	0	4.9392	14	0.00838562	0.637413	0.00259623	0.0162876	1.28583	2.65109	2.06177	NaN	NaN	NaN	NaN	NaN	NaN	NaN	NaN	NaN	NaN	NaN	NaN	NaN	20.9055	20.7391	21.2915	20.8172	NaN	NaN	NaN	NaN	NaN	NaN	NaN	NaN	NaN	NaN	NaN	NaN	NaN	NaN	1.96419e+06	1.75021e+06
Q9HAS0	Thioredoxin-related transmembrane protein 2	TMX2	6	6	6	29.1	0	16.624	55	0.0142076	0.00446061	0.527139	0.0396053	1.40866	1.09077	0.774331	21.9028	22.5279	21.544	21.9937	22.0846	21.7514	22.6143	22.7269	22.3227	22.4755	22.451	22.3367	21.9204	21.9394	22.2625	22.286	22.0282	22.2686	3.92103e+06	6.04747e+06	3.05767e+06	4.17603e+06	4.44761e+06	3.5304e+06	6.4207e+06	6.9419e+06	5.24569e+06	5.83176e+06	5.73356e+06	5.29684e+06	3.96915e+06	4.02177e+06	5.0313e+06
Q53F19	Tensin-3	TNS3	4	4	4	6.6	0	15.011	18	0.000146248	0.031961	0.00153274	8.86373e-06	0.640191	2.11275	3.30018	NaN	NaN	19.921	19.7876	20.5211	20.2684	NaN	NaN	19.4056	19.9134	NaN	19.776	21.4567	21.25	21.0522	21.0494	20.9012	21.0085	NaN	NaN	992701	905026	1.50476e+06	1.26298e+06	NaN	NaN	694493	987485	NaN	897778	2.87813e+06	2.49395e+06	2.17442e+06
Q9NWV4	Mitochondrial import receptor subunit TOM70	TOMM70A	18	18	18	43.4	0	167.05	203	0.0285854	0.951763	0.0307641	0.0170748	1.02241	0.836448	0.818114	25.092	25.1953	24.7933	24.9946	24.9982	24.9011	24.9994	24.8115	25.2444	25.0106	24.8234	25.2471	24.7759	24.7771	24.4986	24.8233	24.712	24.849	3.57639e+07	3.84186e+07	2.90755e+07	3.34291e+07	3.35126e+07	3.13313e+07	3.35405e+07	2.94446e+07	3.97486e+07	3.38019e+07	2.96885e+07	3.9823e+07	2.87269e+07	2.87508e+07	2.37036e+07
Q07021	Torsin-1A-interacting protein 1	TOR1AIP1	13	13	12	29.7	0	77.38	171	1.80529e-05	0.000115902	5.54114e-07	0.0127061	1.3822	1.67334	1.21064	24.2176	24.4933	24.1838	24.0425	24.2504	24.4918	24.846	24.708	24.6158	24.7129	24.9044	24.7311	25.2324	25.0662	24.9125	24.9866	24.856	25.1054	1.95085e+07	2.36166e+07	1.90568e+07	1.72788e+07	1.99571e+07	2.35921e+07	3.01572e+07	2.74062e+07	2.57095e+07	2.74995e+07	3.1403e+07	2.78486e+07	3.94193e+07	3.513e+07	3.15798e+07
P30042	Tumor suppressor p53-binding protein 1	TP53BP1	36	36	36	31.8	0	144.54	369	3.94424e-07	2.1844e-07	2.68106e-09	0.00532418	1.47515	1.71684	1.16385	24.7658	24.7916	24.7184	24.7373	24.8234	24.6387	25.2622	25.3942	25.2418	25.212	25.4326	25.2911	25.4916	25.429	25.3413	25.7239	25.5345	25.609	2.85265e+07	2.90412e+07	2.76045e+07	2.79685e+07	2.96885e+07	2.61209e+07	4.0242e+07	4.40977e+07	3.9677e+07	3.88659e+07	4.52872e+07	4.10563e+07	4.71776e+07	4.51743e+07	4.251e+07
Q9H6V9	Tropomyosin alpha-3 chain;Tropomyosin alpha-1 chain	TPM3;TPM1	17	7	7	41.4	0	49.579	63	0.0378551	0.984205	0.0259416	0.0360866	1.03497	1.48412	1.43397	24.8367	24.3173	24.2541	24.439	23.9751	24.5183	24.8041	24.6212	24.2945	24.6957	24.4016	23.7201	25.3427	24.9451	25.144	24.7904	25.0737	24.4438	2.99634e+07	2.09044e+07	2.00084e+07	2.27443e+07	1.64901e+07	2.40294e+07	2.9294e+07	2.58059e+07	2.05766e+07	2.71736e+07	2.21622e+07	1.38185e+07	4.25513e+07	3.23015e+07	3.70765e+07
Q9NWY4;A8MVJ9	Protein-tyrosine sulfotransferase 1	TPST1	3	3	3	11.9	0.0059653	1.6755	5	0.00481385	0.775267	0.00647666	0.00164627	0.932124	1.44784	1.55327	20.3154	20.2384	20.3321	20.5488	19.9984	20.0316	20.1197	20.0834	20.0055	20.1509	20.0858	20.4425	21.4305	20.654	20.5672	20.68	20.5933	20.5993	1.3048e+06	1.23699e+06	1.31999e+06	1.53393e+06	1.04741e+06	1.0718e+06	1.13929e+06	1.11098e+06	1.05258e+06	1.16419e+06	1.11283e+06	1.42497e+06	2.82633e+06	1.64996e+06	1.55362e+06
Q49AR2	Heat shock protein 75 kDa, mitochondrial	TRAP1	21	21	21	38.8	0	91.367	234	1.97495e-05	0.000348972	0.00395763	5.59402e-07	1.27489	0.831595	0.652285	25.3351	25.3529	25.2393	25.4895	25.5827	25.4251	25.7332	25.6883	25.7661	25.6821	25.7053	25.9583	25.1812	25.0909	24.9315	25.2991	25.0906	25.2321	4.23277e+07	4.28532e+07	3.96083e+07	4.7109e+07	5.02528e+07	4.50524e+07	5.57783e+07	5.40691e+07	5.70649e+07	5.38372e+07	5.471e+07	6.51969e+07	3.80449e+07	3.57366e+07	3.19985e+07
P10643	Tubulin alpha-1B chain	TUBA1B	39	39	0	78.5	0	323.31	2284	0.00112284	0.000133171	0.0560115	0.019045	0.711705	0.859841	1.20814	31.2794	31.3826	31.6557	31.532	31.4355	31.4999	30.7368	30.8687	31.101	30.9769	31.0548	31.0966	30.9203	31.3403	31.1629	31.34	31.3081	31.3846	2.60638e+09	2.79965e+09	3.3831e+09	3.10512e+09	2.90421e+09	3.03679e+09	1.78936e+09	1.96067e+09	2.30321e+09	2.11337e+09	2.23062e+09	2.2962e+09	2.03207e+09	2.71876e+09	2.40418e+09
Q9BRJ6	Alpha-taxilin	TXLNA	9	9	9	25.1	0	121.32	59	0.0112959	0.00860433	0.994057	0.00698602	0.776349	1.01066	1.30181	22.4629	22.3646	22.344	22.2947	22.3915	22.5654	21.868	22.376	22.2151	22.0596	22.0213	21.578	22.6586	22.4259	22.3383	22.2871	22.2697	22.5121	5.78105e+06	5.40027e+06	5.32371e+06	5.14486e+06	5.50191e+06	6.20672e+06	3.82758e+06	5.44311e+06	4.86868e+06	4.37121e+06	4.25669e+06	3.13058e+06	6.62092e+06	5.63467e+06	5.30272e+06
Q96HJ9	Thioredoxin domain-containing protein 5	TXNDC5	14	14	14	35.2	0	55.741	160	0.0483416	0.160115	0.494404	0.0186703	1.17258	0.90617	0.772798	25.8743	25.4493	25.3019	25.273	25.3117	25.5046	25.8807	25.546	25.6358	25.4433	25.7216	25.9015	25.4975	25.4235	25.1202	25.5908	25.0823	25.1585	6.15092e+07	4.58145e+07	4.13648e+07	4.05444e+07	4.16467e+07	4.76047e+07	6.17827e+07	4.89905e+07	5.21368e+07	4.56243e+07	5.53316e+07	6.26799e+07	4.7371e+07	4.50024e+07	3.64698e+07
Q6P1X6	Ubiquitin-associated protein 2-like	UBAP2L	15	15	15	21.5	0	103.37	190	1.00779e-06	4.25209e-07	1.50781e-08	0.0464426	0.669433	0.594058	0.887405	24.845	24.8937	24.8638	25.0129	24.8514	24.7699	24.5117	24.3938	24.2636	24.2541	24.253	24.0571	24.0846	24.1948	24.2189	24.1554	24.0533	24.0219	3.01363e+07	3.1171e+07	3.05316e+07	3.38558e+07	3.02703e+07	2.86077e+07	2.39198e+07	2.20427e+07	2.01406e+07	2.00084e+07	1.99931e+07	1.74546e+07	1.77905e+07	1.92026e+07	1.95261e+07
Q5T6V5	Ubiquitin-conjugating enzyme E2 variant 2	UBE2V2	9	9	5	56.6	0	21.215	71	0.0400843	0.822628	0.0627704	0.019821	0.933774	1.2453	1.33362	23.4897	23.0653	23.4512	23.7189	22.853	23.5194	23.3617	23.3899	22.9251	23.4836	23.3396	23.1046	23.7611	23.5364	23.7101	23.4896	23.8468	23.7906	1.17789e+07	8.77702e+06	1.14687e+07	1.3807e+07	7.57597e+06	1.20239e+07	1.07789e+07	1.09916e+07	7.96421e+06	1.17292e+07	1.0615e+07	9.0194e+06	1.42169e+07	1.21664e+07	1.37231e+07
P54289	UDP-glucose 6-dehydrogenase	UGDH	14	14	14	44.3	0	49.742	144	5.58284e-05	2.49321e-06	0.000348993	0.0296492	0.691679	0.789422	1.14131	24.2412	24.2918	24.66	24.4877	24.3708	24.5717	23.9372	23.8201	23.9089	23.9438	23.9209	23.9442	24.0029	24.0619	24.0735	24.0272	24.1825	24.258	1.98303e+07	2.05381e+07	2.65094e+07	2.35251e+07	2.16941e+07	2.49355e+07	1.60626e+07	1.48103e+07	1.57506e+07	1.61362e+07	1.58821e+07	1.61407e+07	1.6811e+07	1.75127e+07	1.76541e+07
Q9NY47	Netrin receptor UNC5C	UNC5C	5	5	5	7.3	0	8.8518	33	0.0253086	0.913313	0.0304785	0.013679	0.970739	2.12144	2.18538	20.9437	20.5328	21.2996	NaN	NaN	NaN	NaN	21.2837	19.5513	21.0476	NaN	21.0506	21.8033	21.7693	21.2663	21.6662	21.2784	21.8429	2.01689e+06	1.51701e+06	2.58118e+06	NaN	NaN	NaN	NaN	2.55289e+06	768295	2.1675e+06	NaN	2.17201e+06	3.65972e+06	3.57448e+06	2.52229e+06
Q9HB71	U3 small nucleolar RNA-associated protein 14 homolog A	UTP14A	6	6	6	11.5	0	12.614	12	0.0106791	0.441125	0.00289926	0.035063	0.755983	0.354171	0.46849	20.2412	20.4028	20.8388	21.548	20.8235	20.4755	19.894	20.3627	20.4652	21.3046	20.374	NaN	NaN	NaN	NaN	20.169	NaN	NaN	1.23939e+06	1.38629e+06	1.87544e+06	3.06616e+06	1.85566e+06	1.45794e+06	974296	1.34829e+06	1.44757e+06	2.59014e+06	1.35889e+06	NaN	NaN	NaN	NaN
P27708	U3 small nucleolar RNA-associated protein 18 homolog	UTP18	5	5	5	13.3	0	9.8708	20	0.00108851	0.407648	0.00247523	0.000192493	1.09673	0.713385	0.650467	21.0505	21.6529	21.5544	21.505	21.1314	21.0527	21.3604	21.3768	21.6439	21.5386	21.4727	21.4657	20.6835	20.9512	20.9659	21.0617	20.5913	20.8455	2.17186e+06	3.29741e+06	3.07979e+06	2.97612e+06	2.29713e+06	2.17517e+06	2.69229e+06	2.72307e+06	3.2769e+06	3.04624e+06	2.91023e+06	2.89614e+06	1.68405e+06	2.0274e+06	2.04816e+06
Q9BY67	U3 small nucleolar RNA-associated protein 6 homolog	UTP6	5	5	5	10.4	0	46.801	25	0.00608735	0.94191	0.002822	0.00546566	0.944027	0.559577	0.592755	21.0776	21.6281	20.6371	20.6103	21.3245	20.6768	21.2985	21.0171	20.3432	20.8362	20.7942	21.2759	19.8545	20.1168	20.2946	20.4716	20.2246	20.2155	2.21304e+06	3.24121e+06	1.63075e+06	1.60073e+06	2.62612e+06	1.67624e+06	2.57921e+06	2.12216e+06	1.33019e+06	1.87207e+06	1.81835e+06	2.53913e+06	947982	1.137e+06	1.28613e+06
Q05682	Vesicle-associated membrane protein-associated protein B/C	VAPB	10	10	9	43.2	0	34.06	110	3.94424e-07	1.9462e-07	2.72204e-09	0.00651495	1.67653	2.03067	1.21123	23.0711	23.4197	23.3852	23.3553	23.3026	23.3628	24.3041	23.9509	23.9797	23.9468	24.1109	24.0704	24.5368	24.3067	24.2342	24.1644	24.4175	24.3645	8.81238e+06	1.1221e+07	1.09559e+07	1.07311e+07	1.03462e+07	1.07871e+07	2.0714e+07	1.62158e+07	1.65428e+07	1.61698e+07	1.81177e+07	1.76162e+07	2.43396e+07	2.07513e+07	1.97343e+07
P62158	Valine--tRNA ligase	VARS	34	34	34	39.4	0	115.84	235	0.00199552	0.125704	0.0182604	0.000295587	1.10415	0.862307	0.780969	25.3108	25.5351	25.5622	25.5045	25.6213	25.6599	25.6653	25.6205	25.532	25.6678	25.6778	25.8888	25.279	25.2232	25.2101	25.4929	25.2785	25.4296	4.16208e+07	4.86218e+07	4.95438e+07	4.76014e+07	5.16155e+07	5.30151e+07	5.32139e+07	5.15868e+07	4.85174e+07	5.33062e+07	5.3677e+07	6.21306e+07	4.07134e+07	3.91688e+07	3.88147e+07
P27797	Synaptic vesicle membrane protein VAT-1 homolog	VAT1	14	14	14	51.7	0	86.514	227	0.000280203	0.00407841	2.10548e-05	0.0336413	1.38699	1.74071	1.25502	24.3061	24.2289	24.2346	24.1507	24.5579	24.3327	24.7511	24.9415	24.9686	24.5616	24.9825	24.3653	25.17	25.1633	24.7346	24.9898	25.3357	25.1787	2.07427e+07	1.96619e+07	1.97397e+07	1.86245e+07	2.46982e+07	2.11287e+07	2.82373e+07	3.2221e+07	3.2832e+07	2.47616e+07	3.31499e+07	2.16116e+07	3.77507e+07	3.75758e+07	2.79162e+07
O43852	Neurosecretory protein VGF;Neuroendocrine regulatory peptide-1;Neuroendocrine regulatory peptide-2;Antimicrobial peptide VGF[554-577]	VGF	45	45	45	69.9	0	323.31	1071	4.27254e-07	0.00201876	4.55192e-07	2.82246e-09	0.739791	1.91627	2.59029	29.0493	29.0554	28.874	28.612	28.8114	28.823	28.5527	28.4409	28.4978	28.3311	28.4459	28.3847	29.9017	29.9562	30.122	29.4896	29.5563	29.7753	5.55534e+08	5.57888e+08	4.91972e+08	4.1027e+08	4.71081e+08	4.74884e+08	3.93749e+08	3.64388e+08	3.79047e+08	3.37684e+08	3.65653e+08	3.50466e+08	1.00302e+09	1.04163e+09	1.16849e+09
Q9UQM7;Q13557;Q13555;Q13554	Vimentin	VIM	70	70	66	89.7	0	323.31	2548	0.000242741	0.190683	2.36626e-05	0.000691479	0.888055	0.632003	0.711671	31.3765	31.2481	31.2979	31.2508	31.1567	31.238	31.2058	30.833	31.0022	30.8722	31.0629	31.4729	30.6774	30.714	30.3807	30.406	30.8211	30.5523	2.78784e+09	2.55044e+09	2.64002e+09	2.55522e+09	2.39387e+09	2.53265e+09	2.47675e+09	1.91275e+09	2.15076e+09	1.96543e+09	2.24318e+09	2.98049e+09	1.71719e+09	1.76131e+09	1.39798e+09
Q16566	Vacuolar protein sorting-associated protein 26A	VPS26A	8	8	8	37.3	0	27	60	0.0029814	0.0974797	0.000490474	0.0406068	1.2147	1.55811	1.28271	22.0396	22.365	22.2031	21.9267	22.859	22.14	22.359	22.481	22.4418	22.8691	22.7413	22.457	22.9762	22.9199	22.6928	22.9053	23.0491	23.0056	4.31103e+06	5.40177e+06	4.82835e+06	3.98652e+06	7.60755e+06	4.62173e+06	5.37935e+06	5.85404e+06	5.69711e+06	7.66099e+06	7.01154e+06	5.75746e+06	8.25136e+06	7.93556e+06	6.77975e+06
P49069	WD repeat-containing protein 1	WDR1	20	20	20	55	0	92.556	250	8.75835e-05	4.95344e-06	0.000488551	0.0491635	0.733336	0.816602	1.11354	25.7585	25.5686	25.8525	25.9966	25.8321	25.8225	25.4094	25.3585	25.3263	25.3804	25.3883	25.3143	25.5338	25.3728	25.4717	25.5662	25.4811	25.6677	5.67651e+07	4.9764e+07	6.05868e+07	6.69509e+07	5.97361e+07	5.93399e+07	4.45648e+07	4.30199e+07	4.20703e+07	4.36779e+07	4.39177e+07	4.17219e+07	4.8578e+07	4.34484e+07	4.65314e+07
Q86VP6;O75155	WD repeat-containing protein 18	WDR18	9	9	9	28.9	0	22.17	76	0.00956952	0.0568259	0.260047	0.00222873	1.18839	0.889657	0.748625	22.6643	23.0522	22.8002	22.5999	22.8126	23.0531	23.0927	22.7609	22.9131	23.1869	23.2205	23.2952	22.5201	22.7108	22.6696	22.7767	22.7354	22.6055	6.64713e+06	8.69768e+06	7.30372e+06	6.35694e+06	7.36677e+06	8.70311e+06	8.94531e+06	7.10745e+06	7.89824e+06	9.54888e+06	9.77388e+06	1.02933e+07	6.01486e+06	6.86487e+06	6.67159e+06
P27824	WD repeat-containing protein 3	WDR3	6	6	6	10.8	0	16.496	29	0.000557906	5.02409e-05	0.0125945	0.0297633	3.25861	1.80614	0.554267	19.9562	NaN	20.2214	NaN	NaN	20.2988	22.0201	22.1599	21.5361	21.554	21.6997	20.3838	20.5581	21.078	21.0116	20.8932	20.6759	20.5152	1.01722e+06	NaN	1.2225e+06	NaN	NaN	1.28988e+06	4.25315e+06	4.68592e+06	3.04097e+06	3.07894e+06	3.40613e+06	1.36815e+06	1.54385e+06	2.21366e+06	2.11408e+06
Q01518	WD repeat-containing protein 36	WDR36	12	12	12	18.3	0	28.7	53	0.00906952	0.03901	0.341696	0.00219189	1.33818	0.864242	0.645836	22.6514	22.4186	22.0439	22.2571	22.4816	22.3208	22.672	22.5148	22.4394	23.0925	22.6823	23.1978	22.3069	22.1663	21.8242	22.2451	22.4478	21.8937	6.58796e+06	5.60623e+06	4.32389e+06	5.0125e+06	5.85647e+06	5.23878e+06	6.6827e+06	5.9928e+06	5.68765e+06	8.94407e+06	6.73058e+06	9.6213e+06	5.18855e+06	4.70675e+06	3.71312e+06
P40123	Xaa-Pro aminopeptidase 1	XPNPEP1	16	16	16	42.5	0	66.292	169	0.00931049	0.406654	0.0328387	0.00238129	0.894682	1.24577	1.39242	24.3025	23.7345	24.203	24.3523	24.4409	24.307	23.9831	24.3321	23.9194	24.234	24.0556	23.8996	24.4141	24.5371	24.4026	24.8286	24.6394	24.4754	2.0691e+07	1.39571e+07	1.93121e+07	2.14177e+07	2.27742e+07	2.07556e+07	1.65818e+07	2.11199e+07	1.58656e+07	1.97315e+07	1.74364e+07	1.56494e+07	2.23551e+07	2.43446e+07	2.21776e+07
P07384	Xenotropic and polytropic retrovirus receptor 1	XPR1	11	11	11	22.8	0	35.684	55	0.0061101	0.820767	0.00226897	0.00758143	0.928375	0.620676	0.668562	22.1143	22.639	22.5623	23.0439	23.0081	22.5323	22.5116	22.6174	22.4542	22.5776	23.0084	22.1527	21.913	21.8587	21.821	22.1674	21.8801	22.27	4.54012e+06	6.53158e+06	6.1934e+06	8.64779e+06	8.43584e+06	6.06594e+06	5.97953e+06	6.43452e+06	5.74629e+06	6.25943e+06	8.43759e+06	4.66259e+06	3.94885e+06	3.80298e+06	3.70489e+06
P17655	ATP-dependent zinc metalloprotease YME1L1	YME1L1	8	8	8	15.3	0	18.681	62	0.0109128	0.00722443	0.999455	0.00769453	1.4838	1.03727	0.699067	21.1643	21.5233	21.3837	21.3936	21.5409	21.4601	22.1876	21.9695	21.9549	21.7805	22.0539	21.9352	21.838	21.4341	20.7296	21.926	21.3446	21.2236	2.35012e+06	3.01411e+06	2.73612e+06	2.75496e+06	3.0511e+06	2.88492e+06	4.77676e+06	4.10656e+06	4.06521e+06	3.60233e+06	4.35397e+06	4.01008e+06	3.74881e+06	2.83339e+06	1.73873e+06
O15484	14-3-3 protein beta/alpha;14-3-3 protein beta/alpha, N-terminally processed	YWHAB	23	17	15	85	0	289.8	281	0.00107591	0.355447	0.000179081	0.00281953	1.11484	1.51308	1.35721	26.6524	26.3099	26.4618	26.177	26.276	26.5682	26.331	26.8684	26.5589	26.4658	26.7176	26.4337	26.9066	26.9179	26.8516	27.0249	27.3609	26.965	1.0548e+08	8.31896e+07	9.24263e+07	7.58686e+07	8.12576e+07	9.95005e+07	8.44152e+07	1.22516e+08	9.88611e+07	9.26829e+07	1.10357e+08	9.06435e+07	1.25804e+08	1.26793e+08	1.21098e+08
P04632;Q96L46	14-3-3 protein epsilon	YWHAE	30	30	28	89.8	0	255.75	680	0.00291718	0.982201	0.00144947	0.00207375	1.00414	1.27021	1.26496	28.317	27.8886	28.2725	27.9342	28.1894	28.1593	28.1826	28.1613	28.1179	28.0773	28.1873	28.1204	28.6807	28.4287	28.493	28.2131	28.5215	28.5079	3.344e+08	2.48488e+08	3.24243e+08	2.56467e+08	3.06094e+08	2.99774e+08	3.04655e+08	3.0019e+08	2.91294e+08	2.83211e+08	3.05649e+08	2.91799e+08	4.3028e+08	3.6132e+08	3.77788e+08
Q14444	14-3-3 protein theta	YWHAQ	26	22	22	84.5	0	323.31	403	0.0074406	0.00485506	0.999852	0.00469825	0.786843	1.00023	1.27119	28.1407	27.8551	28.0855	27.6747	27.8449	27.9822	27.5585	27.7391	27.5174	27.7498	27.5512	27.4131	27.9869	27.9596	28.0327	27.8799	28.0985	27.6344	2.95934e+08	2.42784e+08	2.84825e+08	2.14247e+08	2.41074e+08	2.65144e+08	1.97667e+08	2.24027e+08	1.92116e+08	2.25695e+08	1.9667e+08	1.78717e+08	2.66009e+08	2.61023e+08	2.74589e+08
[truncated: 12 more columns]

## Sheet: Temporal proteomic profile
Protein identification									two way ANOVA adjusted p-value (Benjamini-Hochberg)			Tukey's post hoc test pvalue treatment*time				Ratio RA/EtOH based on LFQ intensities				log2 LFQ intensity
Uniprot Accession	Protein names	Gene names	Peptide	Razor + unique peptides	Unique peptides	Sequence coverage [%]	Posterior Error probability	MS/MS count (sum)	Treatment	Time	Treatment*time	1h RA vs 1h EtOH	3h RA vs 3h EtOH	8h RA vs 8h EtOH	R:48-ct:48	1h	3h	8h	48h	0h EtOH_1	0h EtOH_2	0h EtOH_3	0h EtOH_4	0h EtOH_5	1h EtOH_1	1h EtOH_2	1h EtOH_3	1h EtOH_4	1h EtOH_5	1h RA_1	1h RA_2	1h RA_3	1h RA_4	1h RA_5	3h EtOH_1	3h EtOH_2	3h EtOH_3	3h EtOH_4	3h EtOH_5	3h RA_1	3h RA_2	3h RA_3	3h RA_4	3h RA_5	8h EtOH_1	8h EtOH_2	8h EtOH_3	8h EtOH_4	8h EtOH_5
P35611-2;E7EV99;A2A3N8;E7ENY0;P35611;P35611-3;Q86XM2;H0Y9H2;D6RF25;D6RJE2;D6RAH3;H0YFD8;H0YG19	Alpha-adducin	ADD1	13	13	12	33.1	1.7931e-86	162	0.00012294	2.93314e-06	0.00265974	0.625988	0.369613	1	1.92876e-07	1.12979	1.15827	1.00755	1.63651	22.9292	22.9651	22.88	23.3131	22.953	22.7007	23.0085	23.0198	22.7556	22.5974	22.8785	23.1492	23.1027	22.979	22.8811	22.8084	22.8062	23.0374	23.2103	22.8237	23.18	23.1243	23.1627	23.0438	23.2721	22.6922	22.8637	22.9408	22.8708	23.1922
A6NKG5	Retrotransposon-like protein 1	RTL1	53	53	53	53.8	0	928	6.38319e-11	6.04456e-05	3.02883e-14	1	0.999996	0.045984	0	1.00619	0.978835	0.849144	0.37035	26.0649	25.9719	26.0904	25.9015	25.8819	25.8822	25.9268	26.0938	25.8803	25.7781	26.0982	25.8051	25.9118	25.8164	25.9724	25.9914	26.0822	25.6453	25.9177	26.0127	25.9157	25.9476	25.8172	25.7761	26.0593	26.1284	26.2717	26.1557	26.1842	26.1478
B4DDF4;Q99439;B4DUT8;Q99439-2;K7ES69;H3BVI6	Calponin-2	CNN2	6	5	5	33.9	1.2015e-51	23	0.0291529	0.124839	0.0362599	0.999974	0.999589	0.886812	0.00023376	1.17397	0.833583	1.40645	3.79147	NaN	20.6122	20.3881	20.7892	20.6331	20.4614	20.3845	20.3117	20.3455	20.3812	20.3295	20.8771	19.8193	20.5888	21.1024	20.3347	20.4068	20.5579	21.2556	20.7573	20.3042	20.534	20.6826	20.2278	20.405	20.1352	19.4985	19.9883	19.8687	20.472
B5AK60;P08183;P21439-3;P21439-2;P21439	Multidrug resistance protein 1	ABCB1	18	18	18	21.1	5.5511e-182	170	1.52319e-06	1.73073e-10	7.08111e-06	0.469528	1	0.999935	3.26929e-10	1.19218	0.998185	1.04891	2.20525	22.312	22.3875	22.3432	21.7653	22.2311	21.9659	22.1313	22.0099	22.2976	22.4237	22.607	22.0849	22.4567	22.4244	22.5229	22.415	22.201	22.0796	22.6456	22.2902	22.3509	22.4089	22.1317	22.4821	22.2867	22.6331	22.5225	22.5483	22.7875	22.8134
O95757;E7ES43;E9PDE8;D6RJ96	Heat shock 70 kDa protein 4L	HSPA4L	25	22	22	42.2	3.0507e-210	164	0.0480991	0.0027953	0.0133185	0.768094	0.971864	1	0.000130785	0.910963	1.06836	0.983905	0.742971	22.4886	22.628	22.6173	22.6508	22.6016	22.4454	22.5345	22.3883	22.4993	22.686	22.5127	22.4072	22.2314	22.4956	22.225	22.5169	22.5632	22.4829	22.5603	22.6261	22.5532	22.5948	22.7677	22.774	22.5205	22.7274	22.5632	22.4586	22.6316	22.8069
F5H7D6;H0YNT2;Q04726-2;F8W964;Q04726-3;F8W8S3;Q6PI57;Q04726-5;Q04726-4;Q04726;H0YKT5;H0YKN8;H0YL70;H0YNI7;H0YLI3;H0YKH0;H0YLW9;H3BUH5;H0YKH5	Transducin-like enhancer protein 3	TLE3	10	10	6	22.9	8.1001e-52	39	4.19101e-09	0.000358204	0.000123919	0.985338	0.190796	0.000303206	1.93511e-10	1.12938	1.40576	1.77809	3.13666	20.407	20.7694	20.2797	20.6684	20.2956	20.5982	20.538	20.4661	20.38	20.6153	20.6171	20.7446	20.8778	20.5022	20.7191	20.6881	20.4547	20.2955	20.1652	20.1158	21.4767	20.5474	20.5029	21.0188	20.4098	20.7211	20.6267	20.596	20.6672	19.8853
F5H896;Q12929;I3L0K5;I3L237;I3L2D4	Epidermal growth factor receptor kinase substrate 8	ZNF711;EPS8;URI1	24	24	23	24.3	1.959e-264	360	0.00860814	0.000394454	0.0242326	0.914274	1	0.999618	2.94146e-05	0.926737	0.997398	0.966374	0.729403	24.0304	24.2671	24.2391	24.3934	24.1791	24.176	24.2738	24.0578	24.0408	24.3898	23.9318	24.1818	24.0131	24.1457	24.1323	24.0937	24.2482	23.9933	24.3102	24.0846	24.1818	24.2116	24.0786	24.1505	24.1081	24.4623	24.1978	24.2869	24.2312	24.3875
P62158;H0Y7A7;E7ETZ0;E7EMB3;U3KRG3;M0QZ52;Q96HY3;F8WBR5;G3V479;G3V361;G3V226	Calmodulin	CALM1;CALM2;CALM3	7	7	7	55.7	1.2719e-177	156	0.026116	1.37746e-06	0.197714	0.999956	1	0.0211746	0.152683	0.969389	1.00522	1.44104	1.34758	23.6957	23.5354	23.3092	23.5753	23.7549	23.9026	23.6474	23.8154	23.6837	23.8899	23.9226	23.9921	23.7017	23.8704	23.0714	23.4411	23.3565	23.5689	23.9555	23.8179	23.5337	23.5076	23.7507	23.8215	23.6277	23.8405	23.6147	23.2895	23.6576	22.8399
K7EIG1	Clustered mitochondria protein homolog	CLUH	10	10	1	11.9	7.8549e-23	26	0.0463268	1.64958e-06	0.000801749	1	1	0.999857	1.96143e-06	1.00173	0.970179	1.11219	0.37813	20.088	19.9247	19.7022	19.9909	19.8154	19.8619	19.8487	20.2807	19.8769	19.6053	20.3526	19.6552	19.3659	19.8843	20.1102	20.2789	20.1936	19.2788	19.8757	19.9727	20.3432	19.8503	19.8745	19.8155	19.586	20.0194	19.9315	20.0774	20.0207	20.0449
O14744;G3V5W5;O14744-2;B4DX49;B4DV00;A8MTP3;G3V580;G3V2L6;H0YJX6;G3V2X6;C9JSX3;H0YJ77;G3V5L5;G3V5T6;G3V507;G3V2F5;H0YJD3	Protein arginine N-methyltransferase 5;Protein arginine N-methyltransferase 5, N-terminally processed	PRMT5	15	15	15	41	3.9838e-132	214	0.00677401	0.0860199	0.311511	1	0.993695	0.104457	0.0144636	0.998189	0.928594	0.794089	0.738141	22.9485	22.8219	23.1145	22.9912	22.8079	22.6751	22.6953	22.3799	22.7416	22.7043	22.6245	22.7728	22.329	22.7107	22.7324	22.6829	22.5292	23.0387	22.622	22.9449	22.4742	22.6441	22.9346	22.761	22.4826	22.9754	22.9038	22.9766	23.1318	23.244
O14813;H0YGU5;H0YAD2;Q96IS3;G3V2N3;P54821-2;O15266-2;P54821;Q99811;A6NNA5;C9JW76;O15266;O60902-2;Q5XKR4;Q15699;O60902;O95076;Q9Y2V3;O60902-3;Q8N693;A6NJT0;A6NLF3	Paired mesoderm homeobox protein 2A	PHOX2A	8	8	5	43.3	1.1783e-49	153	1.52179e-06	0.0397841	0.00623724	1	0.148733	1.91577e-05	2.57715e-05	0.977222	1.24298	1.61258	1.58842	23.038	22.6793	22.9701	23.2082	22.8855	23.2246	22.9966	22.6871	23.1823	23.0158	23.1415	23.0933	23.1004	22.9141	22.7069	22.8133	22.9378	23.2162	23.1272	22.6506	23.243	23.0937	23.3844	23.1513	23.4785	22.5981	22.6823	22.5992	22.8505	22.7269
O15018-2	-	-	17	12	12	6.4	8.2594e-112	35	0.00613284	0.0154926	0.0374834	0.315664	0.999976	0.934171	8.11143e-05	0.690399	1.07759	0.795084	0.407019	20.9857	20.9892	20.8592	20.3177	20.4371	20.9012	21.219	21.0321	20.5548	21.036	21.061	20.2612	20.6336	NaN	20.3222	20.9897	20.6854	20.2782	20.6199	20.4466	20.9993	20.8063	20.5337	20.5275	20.7375	21.2363	21.0966	21.3183	20.7887	20.7937
O15240	Neurosecretory protein VGF;Neuroendocrine regulatory peptide-1;Neuroendocrine regulatory peptide-2;Antimicrobial peptide VGF[554-577]	VGF	42	42	42	70.7	0	926	4.05862e-07	4.28768e-15	3.42633e-12	0.999928	1	0.858296	0	1.05515	1.01047	1.15948	4.73761	27.1834	27.0926	26.9263	27.3566	27.2025	27.4082	27.2346	27.0591	27.0884	27.219	27.1907	27.4188	27.2875	27.4968	26.9726	27.2606	27.0614	27.3291	27.2331	27.0422	26.7892	26.8136	27.3719	27.4383	27.4547	25.8626	25.5327	25.7123	25.6311	26.0433
O15394;B7Z841;H9KV31	Neural cell adhesion molecule 2	NCAM2	7	7	7	12.1	1.5955e-27	18	0.00614766	1.88394e-05	0.00212923	0.996773	0.858081	0.7797	1.71391e-06	0.789938	1.33189	1.47257	4.81614	NaN	NaN	NaN	NaN	NaN	NaN	NaN	NaN	NaN	NaN	NaN	NaN	NaN	NaN	NaN	NaN	NaN	NaN	NaN	NaN	NaN	NaN	NaN	NaN	NaN	NaN	NaN	NaN	NaN	NaN
O43174-2;O43174	Cytochrome P450 26A1	CYP26A1	11	11	11	34.3	4.6003e-54	33	1.52179e-06	1.13216e-08	9.6426e-06	0.997273	0.884029	0.901017	1.28187e-10	1.12984	1.48242	1.25378	16.1165	NaN	NaN	NaN	NaN	NaN	NaN	NaN	NaN	NaN	NaN	NaN	NaN	NaN	NaN	NaN	NaN	NaN	NaN	NaN	NaN	NaN	NaN	NaN	NaN	NaN	NaN	NaN	NaN	NaN	NaN
O43815;O43815-2	Striatin	STRN	8	8	8	17.2	9.1722e-47	53	0.00860814	0.304085	0.248969	1	0.975112	0.585592	0.00273642	0.980564	1.12329	1.22513	1.54276	20.8241	21.0838	21.1831	21.0491	20.5336	21.2621	21.1141	20.8841	20.8964	21.5417	21.3013	21.2603	20.8939	21.0971	21.075	21.237	21.1488	20.7147	21.2229	21.0299	21.2123	21.4213	20.9649	21.345	21.2689	20.9953	20.7599	20.8818	21.0294	21.3343
O75369-2;O75369-9;O75369;O75369-8;O75369-6;O75369-3;E7EN95;O75369-7;O75369-5;O75369-4;H7C5L4;Q8WXT3	Filamin-B	FLNB	97	89	87	57.1	0	843	9.96091e-09	7.69807e-11	3.42633e-12	1	0.999999	0.995654	0	1.00537	1.02593	1.06795	3.34025	24.9457	24.8974	24.8154	24.406	24.6876	24.545	24.5663	24.7679	24.506	24.8661	24.8994	24.5947	24.5999	24.5762	24.6283	24.8152	24.6603	24.6614	24.7404	24.5698	24.9239	24.4835	24.8081	24.7231	24.6681	25.2431	24.9579	24.9598	24.9931	25.1711
O95201;B4E3F7;Q9NR56-3;Q9NR56-4;H7C4T5;Q9NR56-7;Q9NR56-6;Q5VZF2-3;Q5VZF2-2;Q9NR56-2;Q5VZF2;Q9NR56-5;Q9NUK0-2;B1AKI6;Q9NUK0	Zinc finger protein 205	ZNF205	18	18	16	11.7	9.9315e-82	221	0.0263235	0.0224857	0.054215	1	0.985653	0.999601	0.000656513	0.98863	0.945532	1.03648	0.778426	22.8091	23.2721	23.2061	22.8572	23.1255	22.9146	22.8524	22.8287	22.8504	22.9004	22.8263	23.038	22.7157	22.8579	22.8083	22.9167	23.0402	22.712	22.8957	22.7864	22.6636	22.8066	22.8107	22.7911	22.8881	22.8529	22.9552	22.9707	22.9423	22.9128
O95336;M0R261;M0R1L2;M0R0U3	6-phosphogluconolactonase	PGLS	13	13	13	73.3	8.4087e-98	210	0.0106842	0.180101	0.693249	0.994901	0.0304923	0.616771	0.824239	1.06675	1.24699	1.13082	1.10782	23.6183	23.5374	23.6091	23.4731	23.6969	23.6917	23.5281	23.4467	23.4554	23.5827	23.5844	23.3538	23.5593	23.6734	23.9484	23.4775	23.4405	23.4583	23.8384	23.7924	23.9235	23.7252	24.1372	23.9098	23.9283	23.738	23.3604	23.5337	23.5498	23.6606
O95573;F5GWH2;H7BYZ7;H7C260;F5H062	Long-chain-fatty-acid--CoA ligase 3	ACSL3	16	16	15	34.2	1.01e-106	138	0.00205084	1.77443e-08	0.218208	0.79705	0.985991	1	0.00109366	1.13518	1.07472	1.01736	1.43051	21.6312	21.821	21.6499	21.7496	21.6193	21.6529	21.6771	21.5456	21.6997	21.7311	21.775	21.9867	21.7329	21.9089	21.8094	21.8938	21.9601	21.4377	22.1035	21.7155	22.0377	21.932	21.6386	22.0277	22.0433	21.727	22.2192	21.809	22.1813	22.0299
P05556;P05556-2;P05556-5;P05556-4;P05556-3;E7EQW5;C9JPK5;Q5T3E6;E9PLR6;E7EUI6;E7ERX5;C9JJP8;Q5T3E5;E9PQJ2;H7C4N8	Integrin beta-1	ITGB1	19	19	19	37.2	1.6283e-177	230	0.0494475	0.330842	0.00788153	0.999937	0.999989	1	1.24578e-05	1.03656	1.02722	1.00481	1.55757	23.9108	23.7319	23.8648	24.2132	23.869	24.0289	23.8319	24.0912	23.5746	23.9191	24.1204	23.7409	23.9332	23.7913	24.1289	24.0659	24.1451	23.7271	23.931	23.7657	24.0435	23.8041	24.0757	24.0499	23.8814	23.7288	23.8678	23.8553	23.945	23.7264
P07858;E9PKQ7;E9PNL5;E9PHZ5;E9PLY3;E9PQM1;E9PSG5;R4GMQ5;E9PR54;E9PJ67;E9PS78	Cathepsin B;Cathepsin B light chain;Cathepsin B heavy chain	CTSB	11	11	9	41.9	9.937e-242	212	5.59472e-10	1.16894e-10	2.54473e-16	0.633792	0.968275	0.189271	0	0.890742	0.928989	1.16831	3.60018	23.9439	23.9703	24.0153	23.7397	23.8524	23.9904	23.9616	23.7497	24.2035	24.1891	23.911	23.9982	23.668	23.9122	23.7956	23.7531	24.1869	24.0037	23.8206	23.8151	23.8946	23.762	23.7587	23.9138	23.7551	23.6722	23.7145	23.3669	23.5469	23.7905
P07949-2;P07949;C9JYL6	Proto-oncogene tyrosine-protein kinase receptor Ret;Soluble RET kinase fragment;Extracellular cell-membrane anchored RET cadherin 120 kDa fragment	RET	13	13	13	19	3.8954e-129	79	3.54913e-22	2.93448e-22	4.98874e-18	0.999903	0.00655965	0	0	0.928891	1.62568	15.0171	24.5386	17.6897	17.7301	18.2932	NaN	17.958	17.6921	17.4053	17.8505	17.2931	17.5114	17.3522	17.3697	17.6542	17.5231	NaN	17.6157	NaN	18.1655	17.7715	17.8284	18.2693	18.3631	18.4593	18.6484	18.4767	17.9048	17.8521	18.1885	17.7896	18.001
P08107;P08107-2;E7EP94	Heat shock 70 kDa protein 1A/1B	HSPA1A	36	33	19	63.5	0	870	0.00279419	1.21426e-12	4.45641e-05	0.999992	1	0.987003	2.26608e-08	1.01615	1.00671	0.959013	0.720546	27.0135	27.1483	27.1576	27.2119	27.0433	27.1058	27.0712	26.9677	27.1289	26.9411	26.9858	27.1376	27.0624	27.1417	27.0052	27.2587	27.4407	27.3265	27.1734	27.2109	27.2598	27.1714	27.3096	27.375	27.3493	27.2599	27.0834	26.9892	27.1355	27.1654
P09455;H0YAK8	Retinol-binding protein 1	RBP1	13	13	3	80	1.4096e-196	366	0.0307632	1.67786e-06	0.00147359	0.913645	1	0.863016	1.21221e-05	0.838253	1.00399	1.26161	2.1637	24.081	24.535	24.3264	23.7765	24.3272	24.2061	24.3556	24.4946	24.4091	24.1747	24.0677	24.35	24.2037	23.9475	23.7507	24.2643	24.2942	24.095	23.8489	24.044	23.9026	24.6512	23.8135	23.9062	24.1732	24.5796	24.9175	24.8143	24.6509	24.5742
P09529;B4DFN3;K7ERC3;K7ERY9;C9K0L6;K7EN65	Inhibin beta B chain	INHBB	16	16	16	27	9.5589e-112	129	0.00731215	4.41952e-07	1.66011e-05	0.992413	0.995246	1	9.18544e-09	0.917247	1.09943	1.0271	2.20863	22.2341	22.6189	22.8997	22.4514	22.5923	22.5653	22.4161	22.3242	22.4965	22.2162	22.3735	22.1304	22.4167	22.3863	22.0801	22.4277	22.1055	22.3716	22.1554	22.4319	22.8574	22.3263	22.2663	22.548	22.0859	22.7682	22.4313	22.6356	22.8842	22.7573
P10645;G5E966	Chromogranin-A;Vasostatin-1;Vasostatin-2;EA-92;ES-43;Pancreastatin;SS-18;WA-8;WE-14;LF-19;AL-11;GV-19;GR-44;ER-37	CHGA;AP1S3	10	10	10	37.9	1.3218e-136	160	6.14817e-06	2.057e-07	1.75813e-06	0.429619	0.999992	0.99896	1.36131e-10	0.822627	0.973631	1.07454	0.373963	23.6991	23.8556	23.839	23.7503	23.8491	23.8842	23.7494	23.7506	23.8193	23.8438	23.2274	23.8631	23.4099	23.8679	23.0977	23.6798	23.3769	23.6442	23.2718	23.4059	23.229	23.862	23.3262	23.5988	23.075	23.6748	23.5304	23.465	23.3067	23.6897
P11142;E9PKE3;E9PNE6;P11142-2;A8K7Q2;E9PN89;E9PS65;E9PLF4;E9PQQ4;E9PQK7;E9PK54;E9PPY6;E9PM13;E9PN25;E9PI65	Heat shock cognate 71 kDa protein	HSPA8	49	49	37	83.3	0	2399	0.0299611	1.05424e-08	8.05002e-05	0.991105	0.457337	0.540569	2.08392e-06	1.04225	1.09062	0.916517	0.758022	29.6795	29.7347	29.7482	29.6002	29.6262	29.6305	29.6546	29.5929	29.5941	29.6504	29.609	29.7895	29.6794	29.5827	29.7507	29.6944	29.7892	29.5153	29.4753	29.5042	29.7425	29.7276	29.6577	29.7652	29.7358	29.6327	29.7758	29.4401	29.7063	29.4783
P13521;C9JDT0;C9JQI2	Secretogranin-2;Secretoneurin	SCG2	12	12	12	30.8	2.4306e-87	79	0.000428415	2.21437e-05	1.7944e-06	0.999235	0.999107	0.99663	5.90306e-11	1.20586	1.16485	1.30476	10.2735	21.3061	21.2942	21.6114	21.4997	22.1631	21.438	21.5487	21.2729	21.6962	21.2527	21.7	22.0016	21.5435	22.0491	21.1263	21.4692	20.6058	21.6272	21.1009	20.0856	20.7934	20.556	21.4965	21.8629	21.416	20.2964	19.8641	19.918	20.0683	20.4761
P20618	Proteasome subunit beta type-1	PSMB1	12	12	12	58.5	5.7089e-129	253	0.00860814	0.0353742	0.608872	0.812178	0.920267	0.986485	0.0168871	1.11272	1.089	1.0705	1.28373	23.9332	23.8179	23.9194	24.072	24.0674	23.9453	24.0187	23.9997	24.1358	23.851	24.0075	24.1737	24.0047	24.165	24.3556	23.7661	23.9748	23.8475	24.2465	24.1261	23.8794	24.1485	24.2423	24.0825	24.2465	23.8332	23.89	24.0501	24.0206	23.8955
P23921;E9PD78;E9PL69;F5H861;E9PP77;H0YCY7	Ribonucleoside-diphosphate reductase large subunit;Ribonucleoside-diphosphate reductase	RRM1	26	26	26	46.2	7.4666e-292	285	0.0448595	1.00514e-06	0.00140966	0.997379	0.99722	0.996643	2.06885e-06	0.94943	1.05453	0.94749	0.667087	23.2507	23.577	23.4375	23.3704	23.4	23.3909	23.3305	23.163	23.5584	23.4244	23.2968	23.3972	23.1475	23.3644	23.303	23.5652	23.4564	23.5043	23.453	23.4039	23.4726	23.4831	23.7185	23.6731	23.3966	23.908	23.4843	23.6042	23.6572	23.9392
P26196	Probable ATP-dependent RNA helicase DDX6	DDX6	16	16	16	51.6	2.254e-213	261	0.0106842	0.00645927	0.334684	1	0.320851	0.0132624	0.999968	1.00321	1.14887	1.26119	1.02701	23.6453	23.7893	23.4603	23.6999	23.5299	23.819	23.8188	23.5009	23.7976	24.1365	23.8372	23.835	23.7566	23.8335	23.9003	23.6474	23.8756	23.7271	24.1147	23.6616	24.0815	24.0436	24.0147	23.91	24.0266	23.5642	23.6619	23.6941	23.6465	23.6338
P29373;Q5SYZ4	Cellular retinoic acid-binding protein 2	CRABP2	9	8	8	62.3	1.6167e-173	68	0.000126091	1.35518e-08	1.79079e-06	0.999998	0.999976	0.77064	3.15682e-10	0.862798	0.669975	1.76523	128.272	15.1047	NaN	NaN	16.5935	16.5523	NaN	NaN	NaN	15.9417	16.4425	16.4385	16.177	NaN	NaN	16.4147	16.171	NaN	NaN	NaN	15.7878	17.4272	17.4228	NaN	16.4798	16.7422	15.9027	NaN	16.8931	15.9497	NaN
P36871;P36871-2;P36871-3	Phosphoglucomutase-1	PGM1	25	25	25	57.5	9.5648e-242	373	0.00151979	0.00214682	0.000106413	0.999999	0.999531	0.840136	1.9445e-08	0.986231	1.02729	1.07183	1.43394	24.2211	24.1541	24.1692	24.4578	24.2094	24.1891	24.2484	24.0959	24.2799	24.3124	24.1479	24.2182	24.0947	24.1966	24.3639	24.1619	24.2226	24.0033	24.0366	24.2758	24.2782	24.226	24.1459	24.1249	24.1321	24.3578	24.3005	24.242	24.1704	24.2583
P47755;F8W9N7;C9JUG7;B4DG50;F8WED3	F-actin-capping protein subunit alpha-2	CAPZA2	14	14	12	70.3	2.8806e-269	241	0.044893	0.0464635	0.258905	0.999997	0.999998	0.81047	0.0139862	0.972755	1.01355	1.1163	1.30412	23.2966	23.3623	23.4754	23.3133	23.3286	23.6075	23.5847	23.2256	23.6149	23.473	23.4631	23.5009	23.3546	23.6286	23.3785	23.4768	23.4952	23.1606	23.859	23.3907	23.4957	23.3988	23.6968	23.4117	23.5456	23.595	23.437	23.4433	23.3801	23.769
P56730	Neurotrypsin	PRSS12	13	13	13	21.9	1.1736e-83	47	1.12819e-06	2.32891e-11	3.42633e-12	0.999995	0.112507	0.901508	0	1.0542	0.635988	1.2542	10.7677	19.2909	18.812	19.5597	18.1212	19.2934	19.2132	18.7984	19.237	19.1098	19.3903	19.0917	19.1536	19.2606	19.3095	19.3621	19.483	19.4677	19.5629	19.6382	19.3525	18.7181	18.5967	18.9387	18.7084	19.2088	17.893	18.9856	19.0667	18.8989	18.9877
P62993;P62993-2;J3KT38;J3QRL5	Growth factor receptor-bound protein 2	GRB2	6	6	6	38.7	5.6884e-88	96	0.00491898	2.92496e-12	1.61081e-06	0.819643	0.968002	0.969386	1.39019e-09	0.892456	1.08001	1.08484	0.533382	22.1898	22.1607	22.0642	22.0983	22.3242	22.5575	22.2793	22.0693	22.3294	22.5454	22.3843	22.2279	22.1645	22.1688	22.0503	22.2736	21.9929	22.1389	22.3649	21.9177	22.4365	22.209	22.0312	22.3064	22.2782	22.3237	22.2926	22.2066	22.22	22.1987
Q04656-5;Q04656;Q04656-2;Q04656-3;Q04656-4;E7EQQ2;F5H562;P35670-2;P35670-3;E7ET55;F5H748;P35670-4;P35670	Copper-transporting ATPase 1	ATP7A	8	8	8	8.4	7.026e-41	25	0.000229394	1.80608e-08	3.02318e-08	0.976429	1	0.999999	5.00244e-12	0.834695	1.01195	1.04968	7.27857	18.7953	19.197	18.8849	NaN	19.0813	NaN	18.7862	19.0615	18.7381	19.2632	19.2868	NaN	18.9102	18.7308	NaN	NaN	18.7747	NaN	NaN	18.5514	NaN	18.7128	NaN	18.2702	18.1731	19.3418	19.1133	18.8263	19.1396	19.3645
Q12860-2;Q12860;Q12860-3;H0YIJ1	Contactin-1	CNTN1	12	12	12	18.1	2.8632e-54	79	0.0307632	0.00288553	0.0069516	0.991678	1	1	1.02085e-05	0.917285	0.998982	0.973079	0.570703	21.7643	21.6889	22.122	21.7846	22.0819	21.6496	21.921	22.0468	21.8326	21.7567	21.995	21.6553	21.6102	21.8067	21.4963	21.9452	21.7127	21.777	21.9048	21.3646	21.8547	21.9196	21.7978	21.6224	21.5373	21.9868	21.74	22.1994	22.2923	22.4423
Q13009;M0R247;M0QZW2	T-lymphoma invasion and metastasis-inducing protein 1	TIAM1;HNRNPUL1	14	10	10	11.1	2.6095e-192	162	0.0210334	0.243913	0.255214	0.997098	1	0.305959	0.00574949	1.05717	0.995822	1.2081	1.37676	23.318	23.4481	23.0879	23.7341	23.498	23.641	23.8215	23.423	23.3045	23.3092	23.5412	23.7563	23.5244	23.5695	23.5685	23.4122	23.6929	23.3853	23.7291	23.6959	23.775	23.5224	23.2963	23.5277	23.7504	23.0554	23.2946	23.3736	23.209	23.3479
Q14195-2;D6RF19;H0YB87;J3QRF7	-	-	35	35	7	51.4	0	880	0.000574997	1.52387e-06	1.79079e-06	0.787369	0.860115	0.9933	6.09958e-10	0.915538	1.08055	1.05215	1.66034	26.2792	26.526	26.3981	26.3968	26.225	26.3861	26.4684	26.3745	26.3863	26.4903	26.2177	26.3845	26.2999	26.3151	26.2502	26.2846	26.5298	26.1586	26.3351	26.1221	26.417	26.5549	26.3748	26.3634	26.3034	26.4313	26.4944	26.2511	26.278	26.1454
Q14894;I3L325;H9KVC2;I3L3Y1;I3NI53;I3L2W5;I3L3J9	Thiomorpholine-carboxylate dehydrogenase	CRYM	3	3	3	1.3	2.8225e-13	13	0.00192728	0.00398926	0.0123182	0.999709	0.599907	0.999978	4.19512e-06	1.1491	1.71115	1.10127	5.47655	NaN	NaN	NaN	NaN	NaN	NaN	NaN	NaN	NaN	NaN	NaN	NaN	NaN	NaN	NaN	NaN	NaN	NaN	NaN	NaN	NaN	NaN	NaN	NaN	NaN	NaN	NaN	NaN	NaN	NaN
Q15019;Q15019-2;B5MCX3;C9J938;C9JB25;C9IZU3;C9J2Q4;C9JQJ4;C9JZI2;C9IY94;H7C310;H7C2Y0;C9JFT1;F8WB65;C9JT15;C9JSE7;B5MD47;H7C1T1	Septin-2	SEPT2	15	14	14	63.4	1.8673e-264	359	0.0410603	0.017375	0.418563	0.988971	0.638818	0.999775	0.00681435	1.0579	1.13186	1.03847	1.31587	25.2607	24.9645	25.2476	24.9276	25.2009	25.2658	25.0484	24.8297	25.1374	24.6234	25.2123	25.0607	25.0062	25.0998	25.0101	25.0194	24.832	24.979	25.3469	24.9623	25.2258	24.9974	25.2747	25.331	25.2352	25.1185	24.7192	24.9859	25.0868	24.9541
Q15113	Procollagen C-endopeptidase enhancer 1	PCOLCE	10	10	10	31	1.3285e-70	93	0.0307632	0.000341255	0.201097	1	0.196154	0.982774	0.00277899	0.982413	1.22519	1.0764	1.38029	21.3553	21.5968	21.4579	21.5848	21.5491	21.697	21.5849	21.4223	21.6309	21.7107	21.5038	21.6952	21.4511	21.694	21.5752	21.388	21.5011	21.4392	21.7647	21.3989	21.6841	21.6394	22.143	21.7153	21.7492	21.5428	21.1624	21.1791	21.2486	21.6184
Q15149-7;Q15149-8;Q15149-9;Q15149-5;Q15149-4;Q15149-6;Q15149-3;Q15149-2;Q15149;E9PMV1;H0YDN1;E9PIA2;E9PKG0;E9PQ28	Plectin	PLEC	88	88	85	27.2	0	460	0.0340168	7.10092e-08	0.235209	1	0.999415	0.916425	0.00457897	1.02012	0.95205	0.911956	0.753423	24.8621	24.607	24.7519	24.4345	24.5819	24.5848	24.3955	24.5995	24.6182	24.613	24.7657	24.514	24.5505	24.4529	24.6618	24.621	24.3696	24.2528	24.5732	24.338	24.3783	24.2772	24.3872	24.4324	24.3556	24.9164	24.6707	24.7872	24.7445	25.0839
Q6P2Q9;I3L0J9;I3L3Z8;I3L1T8	Pre-mRNA-processing-splicing factor 8	PRPF8	58	58	58	34.1	0	509	0.0103523	0.000623347	0.430971	0.961623	0.995157	0.343687	0.00427728	0.934298	0.94666	0.862967	0.770638	24.1473	24.0367	24.2574	23.691	23.9554	24.0036	23.8771	24.0134	23.9554	23.9483	24.099	23.6243	23.9939	23.8862	23.6475	23.9681	23.9342	24.1159	24.011	23.9885	24.0316	23.7703	23.9279	23.8864	23.9983	24.4679	24.3279	24.1732	24.2814	24.4015
Q70J99;Q70J99-3;K7EQ37;Q70J99-2;K7EN81;K7EIH3;K7EN29;K7EM66;K7EMK8	Protein unc-13 homolog D	UNC13D	20	20	20	28.1	1.8854e-85	104	0.0202266	0.176538	0.235209	1	0.966518	0.811663	0.00135125	1.00986	1.08462	1.12614	1.40154	21.4652	21.3211	21.2432	21.447	20.8727	21.0729	21.1971	21.3375	21.1799	21.3391	21.4305	21.2031	21.1826	21.3448	21.0194	21.353	21.3723	21.4864	20.9562	21.1667	21.5197	21.4774	21.266	21.2963	21.4028	21.2521	21.4448	21.4774	21.3401	21.0309
Q8IV48;E5RIV7	3-5 exoribonuclease 1	ERI1	4	4	4	14.6	8.4089e-13	17	7.7317e-05	7.80489e-07	2.17895e-05	1	0.999043	0.991424	2.53247e-09	0.902269	1.14037	1.24275	8.08278	18.0712	NaN	19.3123	NaN	NaN	NaN	18.0946	19.1243	NaN	NaN	NaN	NaN	NaN	NaN	NaN	NaN	NaN	NaN	NaN	NaN	NaN	19.2034	NaN	18.4073	NaN	NaN	18.5824	NaN	NaN	NaN
Q8IZJ1-2;Q8IZJ1	Netrin receptor UNC5B	UNC5B	4	4	4	7.5	1.2427e-16	16	0.0249335	0.000720391	0.514881	0.999999	0.995818	0.419043	0.0418773	1.12021	1.29096	1.60405	1.96887	NaN	NaN	NaN	NaN	NaN	NaN	NaN	NaN	NaN	NaN	NaN	NaN	NaN	NaN	NaN	NaN	NaN	NaN	NaN	NaN	NaN	NaN	NaN	NaN	NaN	NaN	NaN	NaN	NaN	NaN
Q92786;C9JU29	Prospero homeobox protein 1	PROX1	6	6	6	11.4	1.0757e-31	19	0.0249335	0.00979864	0.235209	0.0859743	1	0.999521	0.00604443	0.593812	0.994425	0.876194	0.428927	19.6325	19.3542	19.5896	19.6245	19.4359	19.6487	19.5462	19.2437	19.5544	19.4168	NaN	19.3807	18.9695	NaN	19.0383	19.5225	19.9032	19.9777	NaN	19.5261	NaN	19.6801	19.9455	19.6899	19.6853	20.0189	19.7181	19.6739	20.32	20.1597
Q9BZF1-3;Q9BZF1-2;Q9BZF1;F8VUA7;F8VQX7;F8VZ43;F5GZ42;B4DVB0;Q9H0X9-2;Q9H0X9	Oxysterol-binding protein-related protein 8;Oxysterol-binding protein	OSBPL8	12	12	12	22.1	1.8872e-69	48	0.0249335	4.99973e-05	0.530816	0.99598	0.948655	0.753971	0.010762	1.12732	1.21116	1.32532	1.83403	20.1308	20.3925	20.2319	20.6083	19.9324	20.7479	20.2183	19.4675	20.1401	19.8568	20.7951	20.1628	19.7686	20.2219	20.4588	20.1317	20.4378	19.6324	20.0688	19.7887	20.3422	19.9897	20.645	20.4065	20.1015	19.5945	19.1379	19.8848	20.3091	19.8273
Q9H0S4-2;Q9H0S4;F5H1N9	Probable ATP-dependent RNA helicase DDX47	DDX47	6	6	6	21.4	1.4505e-20	30	0.00680869	0.000433064	0.514881	0.562037	0.999376	0.876484	0.0101307	0.801262	0.907622	0.858924	0.640815	20.1182	20.1658	20.0974	19.5162	20.3428	19.96	20.1451	20.1111	20.3272	20.3391	19.7813	19.9213	19.9717	19.9722	19.645	19.7638	20.0105	20.7321	20.1426	20.2206	20.1856	20.0587	19.8605	20.083	20.1454	19.9795	20.1373	19.6506	19.9117	19.8465
Q9H4A4;A6NKB8;C9JMZ3;H7C2T3	Aminopeptidase B	RNPEP	26	26	26	59.7	5.6017e-191	290	0.00151979	6.18865e-05	0.000132282	0.999997	0.989574	0.979766	2.8788e-08	0.983494	1.04351	1.0489	1.42373	23.6342	23.5554	23.6682	23.7492	23.5818	23.7014	23.7405	23.6239	23.4736	23.6875	23.5684	23.6921	23.5297	23.6796	23.645	23.5992	23.638	23.6664	23.6103	23.4425	23.7643	23.5866	23.6161	23.6847	23.615	23.67	23.4519	23.6446	23.5018	23.6089
Q9H8H0;Q9H8H0-2;J3QLQ6;J3QR28	Nucleolar protein 11	NOL11	7	7	7	14.7	1.7658e-51	58	0.00400068	0.00125752	0.0922358	0.999995	1	0.485777	0.00036852	0.973699	1.01435	0.841939	0.664594	21.0751	21.1968	21.2542	21.2219	21.3008	21.0821	21.2071	20.9623	20.7694	20.9119	20.9813	21.2626	20.7498	20.6975	21.0155	20.9282	21.2495	20.9749	21.0988	21.0682	21.1459	20.6334	20.9486	21.5483	21.0117	21.092	21.2603	21.0267	21.1471	21.3767
Q9NPH2;Q9NPH2-3;U3KQ80;J3KRH4;J3QRY0;J3QRH1;M0QYR5;J3QLD7;J3QKW9	Inositol-3-phosphate synthase 1	ISYNA1	13	13	2	38.7	1.0613e-118	235	0.0448595	4.73873e-05	0.00079578	0.999469	1	1	8.75247e-07	1.07457	0.990328	1.00468	1.87319	23.4331	23.3699	23.5362	23.5241	23.4784	23.3715	23.3129	23.3423	23.2549	22.8947	23.1908	23.2604	23.1995	23.1168	23.8453	23.1533	23.4215	23.4087	23.3354	23.68	23.1887	23.3099	23.2372	23.2099	23.8983	23.1595	23.3691	23.3254	23.3031	23.4271
Q9NQW7-3;Q9NQW7;G8JLB2;Q5T6H7;Q9NQW7-2;Q5T6H2;Q5T6H3	Xaa-Pro aminopeptidase 1	XPNPEP1	16	16	16	42.5	6.2065e-216	266	0.0141741	0.000197004	0.594186	0.748346	0.989386	0.919694	0.0143422	1.14419	1.09486	1.11072	1.33436	23.1243	22.9583	23.1184	23.0017	22.9173	23.0488	22.6377	22.8496	22.9198	22.931	22.8101	23.169	23.0301	23.1228	23.2225	22.7166	22.9089	23.0834	22.816	23.0285	22.4627	23.0439	23.1575	23.2087	23.2351	22.7552	22.8494	22.9561	23.1694	23.1245
Q9NR63;Q9NR63-3;Q9NR63-2;E7ER08;E5RHN4;E5RHM2	Cytochrome P450 26B1	CYP26B1	9	9	9	26.2	2.8575e-68	33	0.0026113	6.32942e-07	1.01618e-07	1	0.999072	1	2.94635e-11	0.876411	0.86489	0.94805	10.7708	NaN	NaN	NaN	NaN	NaN	NaN	NaN	NaN	NaN	NaN	NaN	NaN	NaN	NaN	NaN	NaN	NaN	NaN	NaN	NaN	NaN	NaN	NaN	NaN	NaN	NaN	NaN	NaN	NaN	NaN
[truncated: 78 more columns]
